# Supplementary material for: Application of interval type-2 fuzzy logic and type-1 fuzzy logic-based approaches to social networks for spam detection with combined feature capabilities
Source: PeerJ Comput Sci. 2023 Apr 21;9:e1316. doi: 10.7717/peerj-cs.1316 (PMC10280623; doi:10.7717/peerj-cs.1316)
Supplement: Supplemental Information 4 — Labeled data used in learning are included. The dataset is labeled and displayed according to the Crowdsourcing method as spam and not spam. [file peerj-cs-09-1316-s004.xlsx]

## Sheet: Sayfa1
SCA	SITW	UL	UGE	UDPI	RTWT	USC	UFC	ULC	UFRC	UFLC	UCA	CLASS
TRUE	YES	NO	FALSE	TRUE	TRUE	700-799	1000-1999	0-9	500-599	800-899	2015-2017	FALSE
FALSE	YES	YES	TRUE	FALSE	TRUE	20000-29999	20000-29999	700-799	200-299	30000-39999	2006-2008	FALSE
FALSE	YES	NO	FALSE	FALSE	FALSE	9000-9999	20-29	0-9	200-299	100-199	2009-2011	TRUE
FALSE	YES	YES	FALSE	FALSE	FALSE	1000-1999	0-9	0-9	20-29	10-19	2009-2011	TRUE
FALSE	YES	NO	FALSE	TRUE	FALSE	2000-2999	10-19	0-9	20-29	20-29	2012-2014	TRUE
FALSE	YES	NO	FALSE	TRUE	FALSE	2000-2999	0-9	0-9	0-9	0-9	2015-2017	TRUE
FALSE	YES	NO	FALSE	TRUE	FALSE	1000-1999	10-19	0-9	0-9	0-9	2012-2014	TRUE
FALSE	YES	NO	FALSE	TRUE	FALSE	3000-3999	30-39	0-9	40-49	20-29	2012-2014	TRUE
FALSE	YES	NO	FALSE	TRUE	FALSE	2000-2999	30-39	0-9	200-299	200-299	2015-2017	TRUE
FALSE	YES	NO	FALSE	TRUE	FALSE	2000-2999	30-39	0-9	0-9	10-19	2012-2014	TRUE
FALSE	YES	NO	FALSE	TRUE	FALSE	1000-1999	20-29	0-9	30-39	20-29	2012-2014	TRUE
FALSE	YES	NO	FALSE	TRUE	FALSE	3000-3999	40-49	0-9	0-9	20-29	2009-2011	TRUE
FALSE	YES	NO	FALSE	TRUE	FALSE	1000-1999	10-19	0-9	0-9	20-29	2012-2014	TRUE
FALSE	YES	NO	FALSE	TRUE	FALSE	2000-2999	0-9	0-9	0-9	10-19	2009-2011	TRUE
FALSE	YES	NO	FALSE	TRUE	FALSE	2000-2999	0-9	0-9	0-9	10-19	2009-2011	TRUE
FALSE	NO	NO	FALSE	TRUE	FALSE	30000-39999	900-999	30-39	1000-1999	1000-1999	2012-2014	FALSE
FALSE	YES	NO	FALSE	TRUE	FALSE	2000-2999	10-19	0-9	100-199	100-199	2012-2014	TRUE
FALSE	YES	YES	FALSE	FALSE	FALSE	2000-2999	10-19	0-9	100-199	70-79	2012-2014	TRUE
TRUE	NO	NO	FALSE	TRUE	FALSE	100000-1999999	0-9	80-89	400-499	10000-19999	2015-2017	FALSE
FALSE	YES	NO	FALSE	TRUE	FALSE	3000-3999	0-9	0-9	0-9	20-29	2009-2011	TRUE
FALSE	NO	NO	FALSE	TRUE	FALSE	30000-39999	900-999	30-39	1000-1999	1000-1999	2012-2014	FALSE
TRUE	NO	NO	FALSE	TRUE	FALSE	100000-1999999	0-9	80-89	400-499	10000-19999	2015-2017	FALSE
FALSE	YES	NO	FALSE	TRUE	TRUE	200-299	100-199	0-9	500-599	20-29	2015-2017	FALSE
FALSE	YES	NO	TRUE	TRUE	TRUE	30000-39999	10000-19999	0-9	500-599	1000-1999	2012-2014	FALSE
FALSE	YES	YES	TRUE	TRUE	TRUE	20000-29999	2000-2999	80-89	3000-3999	2000-2999	2012-2014	FALSE
FALSE	YES	YES	FALSE	TRUE	FALSE	2000-2999	0-9	0-9	20-29	10-19	2009-2011	TRUE
FALSE	YES	NO	FALSE	TRUE	FALSE	2000-2999	0-9	0-9	10-19	10-19	2009-2011	TRUE
FALSE	YES	NO	TRUE	FALSE	TRUE	5000-5999	6000-6999	0-9	400-499	900-999	2012-2014	FALSE
FALSE	YES	YES	TRUE	FALSE	FALSE	1000-1999	30-39	0-9	0-9	20-29	2012-2014	TRUE
FALSE	YES	YES	FALSE	TRUE	FALSE	20000-29999	0-9	0-9	2000-2999	1000-1999	2015-2017	TRUE
FALSE	YES	YES	FALSE	TRUE	FALSE	1000-1999	0-9	0-9	20-29	10-19	2009-2011	TRUE
FALSE	YES	NO	TRUE	TRUE	FALSE	1000-1999	0-9	0-9	2000-2999	1000-1999	2015-2017	TRUE
FALSE	YES	YES	FALSE	TRUE	TRUE	0-99	20-29	0-9	80-89	0-9	2012-2014	FALSE
FALSE	YES	NO	FALSE	FALSE	FALSE	100000-1999999	0-9	0-9	200-299	1000-1999	2009-2011	FALSE
FALSE	YES	NO	TRUE	FALSE	TRUE	10000-19999	20000-29999	0-9	300-399	400-499	2015-2017	FALSE
TRUE	YES	YES	FALSE	TRUE	FALSE	4000-4999	0-9	0-9	40-49	10-19	2015-2017	FALSE
FALSE	YES	NO	FALSE	TRUE	FALSE	2000-2999	0-9	0-9	0-9	20-29	2012-2014	FALSE
FALSE	YES	NO	FALSE	TRUE	TRUE	2000-2999	0-9	0-9	4000-4999	800-899	2015-2017	TRUE
TRUE	YES	NO	FALSE	TRUE	FALSE	1000-1999	0-9	0-9	20-29	20-29	2015-2017	FALSE
FALSE	YES	YES	FALSE	TRUE	TRUE	200-299	100-199	0-9	700-799	100-199	2015-2017	TRUE
TRUE	YES	NO	FALSE	TRUE	FALSE	1000-1999	0-9	0-9	10-19	0-9	2015-2017	FALSE
TRUE	YES	NO	FALSE	TRUE	FALSE	3000-3999	0-9	0-9	0-9	10-19	2012-2014	FALSE
TRUE	YES	NO	FALSE	TRUE	FALSE	2000-2999	0-9	0-9	0-9	10-19	2009-2011	FALSE
TRUE	YES	NO	FALSE	TRUE	FALSE	2000-2999	0-9	0-9	0-9	10-19	2009-2011	FALSE
FALSE	YES	NO	FALSE	TRUE	TRUE	3000-3999	3000-3999	0-9	1000-1999	200-299	2015-2017	TRUE
TRUE	YES	YES	TRUE	FALSE	FALSE	2000-2999	0-9	0-9	0-9	20-29	2012-2014	FALSE
FALSE	YES	YES	FALSE	TRUE	TRUE	7000-7999	10000-19999	10-19	200-299	500-599	2015-2017	TRUE
TRUE	YES	NO	FALSE	TRUE	FALSE	1000-1999	0-9	0-9	30-39	10-19	2012-2014	FALSE
TRUE	YES	YES	FALSE	TRUE	FALSE	4000-4999	0-9	0-9	2000-2999	300-399	2009-2011	FALSE
TRUE	YES	NO	FALSE	TRUE	FALSE	2000-2999	0-9	0-9	0-9	10-19	2009-2011	FALSE
FALSE	YES	NO	FALSE	TRUE	TRUE	90000-99999	70000-79999	100-199	400-499	1000-1999	2009-2011	TRUE
TRUE	YES	NO	FALSE	TRUE	FALSE	3000-3999	0-9	0-9	0-9	10-19	2009-2011	FALSE
TRUE	YES	NO	FALSE	TRUE	FALSE	1000-1999	0-9	0-9	30-39	10-19	2012-2014	FALSE
TRUE	YES	NO	FALSE	TRUE	FALSE	4000-4999	50-59	0-9	1000-1999	300-399	2009-2011	FALSE
TRUE	YES	NO	FALSE	TRUE	FALSE	1000-1999	0-9	0-9	0-9	10-19	2012-2014	FALSE
TRUE	YES	NO	FALSE	TRUE	FALSE	2000-2999	0-9	0-9	0-9	10-19	2012-2014	FALSE
FALSE	YES	NO	FALSE	TRUE	TRUE	2000-2999	0-9	0-9	4000-4999	800-899	2015-2017	TRUE
TRUE	YES	NO	FALSE	FALSE	FALSE	1000-1999	0-9	0-9	0-9	10-19	2012-2014	FALSE
FALSE	YES	NO	FALSE	TRUE	TRUE	3000-3999	3000-3999	0-9	1000-1999	200-299	2015-2017	TRUE
TRUE	YES	YES	FALSE	TRUE	FALSE	1000-1999	0-9	0-9	10-19	10-19	2009-2011	FALSE
FALSE	YES	YES	TRUE	FALSE	TRUE	10000-19999	2000-2999	10-19	400-499	800-899	2009-2011	FALSE
TRUE	YES	YES	TRUE	FALSE	FALSE	20000-29999	70-79	0-9	400-499	500-599	2009-2011	FALSE
FALSE	YES	YES	TRUE	FALSE	TRUE	20000-29999	10000-19999	0-9	200-299	400-499	2009-2011	FALSE
TRUE	YES	NO	FALSE	TRUE	FALSE	1000-1999	0-9	0-9	0-9	10-19	2012-2014	FALSE
TRUE	YES	YES	FALSE	TRUE	FALSE	2000-2999	0-9	0-9	0-9	10-19	2009-2011	FALSE
FALSE	YES	YES	FALSE	TRUE	TRUE	8000-8999	20000-29999	10-19	1000-1999	200-299	2015-2017	TRUE
TRUE	YES	NO	FALSE	TRUE	FALSE	2000-2999	0-9	0-9	0-9	10-19	2009-2011	FALSE
TRUE	YES	NO	FALSE	TRUE	FALSE	1000-1999	0-9	0-9	0-9	10-19	2012-2014	FALSE
TRUE	YES	NO	FALSE	TRUE	FALSE	2000-2999	0-9	0-9	40-49	50-59	2012-2014	FALSE
FALSE	YES	NO	FALSE	TRUE	TRUE	1000-1999	9000-9999	0-9	500-599	100-199	2015-2017	TRUE
TRUE	YES	NO	FALSE	TRUE	FALSE	1000-1999	0-9	0-9	10-19	20-29	2009-2011	FALSE
TRUE	YES	NO	FALSE	TRUE	FALSE	2000-2999	0-9	0-9	0-9	20-29	2009-2011	FALSE
TRUE	YES	NO	FALSE	TRUE	FALSE	2000-2999	0-9	0-9	0-9	10-19	2012-2014	FALSE
TRUE	YES	NO	FALSE	TRUE	FALSE	3000-3999	0-9	0-9	0-9	20-29	2012-2014	FALSE
TRUE	YES	NO	FALSE	TRUE	FALSE	1000-1999	0-9	0-9	20-29	20-29	2015-2017	FALSE
FALSE	YES	NO	TRUE	FALSE	FALSE	10000-19999	20000-29999	100-199	700-799	20000-29999	2009-2011	FALSE
TRUE	YES	YES	FALSE	FALSE	FALSE	2000-2999	0-9	0-9	20-29	60-69	2009-2011	FALSE
TRUE	YES	NO	FALSE	TRUE	FALSE	1000-1999	0-9	0-9	0-9	20-29	2009-2011	FALSE
TRUE	YES	NO	FALSE	TRUE	FALSE	1000-1999	0-9	0-9	0-9	0-9	2012-2014	FALSE
TRUE	YES	YES	FALSE	FALSE	FALSE	1000-1999	70-79	0-9	500-599	100-199	2009-2011	FALSE
TRUE	YES	NO	FALSE	TRUE	FALSE	1000-1999	0-9	0-9	0-9	0-9	2009-2011	FALSE
TRUE	YES	YES	FALSE	TRUE	FALSE	1000-1999	0-9	0-9	50-59	10-19	2015-2017	FALSE
TRUE	YES	NO	FALSE	TRUE	FALSE	2000-2999	0-9	0-9	10-19	20-29	2012-2014	FALSE
FALSE	YES	NO	FALSE	TRUE	FALSE	2000-2999	6000-6999	600-699	100-199	100000-1999999	2015-2017	TRUE
TRUE	NO	NO	FALSE	TRUE	FALSE	9000-9999	0-9	0-9	0-9	0-9	2015-2017	FALSE
TRUE	YES	YES	FALSE	FALSE	FALSE	2000-2999	0-9	0-9	500-599	10-19	2009-2011	FALSE
TRUE	YES	NO	FALSE	TRUE	FALSE	2000-2999	0-9	0-9	10-19	10-19	2009-2011	FALSE
TRUE	YES	NO	FALSE	TRUE	FALSE	2000-2999	0-9	0-9	30-39	30-39	2012-2014	FALSE
FALSE	YES	NO	TRUE	TRUE	FALSE	30000-39999	10000-19999	0-9	500-599	1000-1999	2012-2014	FALSE
TRUE	YES	YES	FALSE	FALSE	FALSE	4000-4999	0-9	0-9	100-199	50-59	2012-2014	FALSE
TRUE	NO	NO	FALSE	TRUE	FALSE	9000-9999	0-9	0-9	0-9	0-9	2015-2017	FALSE
FALSE	YES	NO	FALSE	TRUE	FALSE	1000-1999	0-9	0-9	20-29	10-19	2012-2014	TRUE
FALSE	YES	NO	FALSE	TRUE	FALSE	2000-2999	0-9	0-9	100-199	0-9	2009-2011	TRUE
FALSE	YES	YES	FALSE	TRUE	FALSE	2000-2999	0-9	0-9	0-9	20-29	2012-2014	TRUE
FALSE	YES	NO	FALSE	TRUE	FALSE	3000-3999	0-9	0-9	0-9	40-49	2009-2011	TRUE
FALSE	YES	NO	FALSE	TRUE	FALSE	1000-1999	0-9	0-9	0-9	10-19	2012-2014	TRUE
FALSE	YES	YES	FALSE	TRUE	TRUE	3000-3999	4000-4999	0-9	200-299	20-29	2015-2017	TRUE
FALSE	NO	NO	FALSE	TRUE	FALSE	9000-9999	0-9	0-9	0-9	0-9	2015-2017	TRUE
FALSE	YES	NO	FALSE	TRUE	TRUE	2000-2999	10000-19999	0-9	1000-1999	100-199	2015-2017	TRUE
FALSE	YES	YES	FALSE	FALSE	FALSE	20000-29999	6000-6999	0-9	600-699	20-29	2009-2011	FALSE
FALSE	YES	NO	TRUE	FALSE	FALSE	30000-39999	10000-19999	0-9	100-199	200-299	2012-2014	TRUE
FALSE	YES	YES	FALSE	FALSE	TRUE	3000-3999	200-299	0-9	100-199	70-79	2009-2011	FALSE
FALSE	YES	NO	TRUE	FALSE	FALSE	10000-19999	500-599	0-9	300-399	100-199	2009-2011	TRUE
TRUE	YES	NO	FALSE	TRUE	TRUE	600-699	7000-7999	0-9	4000-4999	500-599	2012-2014	FALSE
FALSE	YES	YES	TRUE	TRUE	FALSE	5000-5999	200-299	0-9	50-59	100-199	2009-2011	TRUE
FALSE	YES	YES	TRUE	FALSE	FALSE	2000-2999	0-9	0-9	100-199	80-89	2009-2011	TRUE
FALSE	YES	NO	FALSE	TRUE	FALSE	1000-1999	0-9	0-9	10-19	10-19	2012-2014	TRUE
FALSE	YES	YES	FALSE	TRUE	FALSE	4000-4999	0-9	0-9	4000-4999	400-499	2015-2017	TRUE
FALSE	YES	NO	FALSE	TRUE	FALSE	1000-1999	0-9	0-9	0-9	20-29	2012-2014	TRUE
FALSE	YES	NO	FALSE	TRUE	FALSE	1000-1999	0-9	0-9	0-9	10-19	2009-2011	TRUE
FALSE	NO	NO	FALSE	TRUE	FALSE	9000-9999	0-9	0-9	0-9	0-9	2015-2017	TRUE
TRUE	YES	NO	FALSE	TRUE	TRUE	3000-3999	3000-3999	0-9	1000-1999	200-299	2015-2017	FALSE
FALSE	YES	NO	FALSE	FALSE	FALSE	1000-1999	20-29	0-9	200-299	100-199	2009-2011	TRUE
FALSE	YES	NO	FALSE	TRUE	FALSE	2000-2999	0-9	0-9	0-9	10-19	2009-2011	TRUE
FALSE	YES	YES	FALSE	TRUE	FALSE	1000-1999	0-9	0-9	0-9	10-19	2015-2017	TRUE
FALSE	YES	NO	FALSE	TRUE	FALSE	2000-2999	0-9	0-9	0-9	0-9	2009-2011	TRUE
TRUE	YES	NO	FALSE	TRUE	TRUE	90000-99999	70000-79999	100-199	400-499	1000-1999	2009-2011	FALSE
FALSE	YES	NO	FALSE	TRUE	FALSE	2000-2999	0-9	0-9	0-9	10-19	2009-2011	TRUE
FALSE	YES	NO	FALSE	TRUE	FALSE	2000-2999	0-9	0-9	0-9	20-29	2009-2011	TRUE
FALSE	NO	NO	FALSE	TRUE	FALSE	9000-9999	0-9	0-9	20-29	0-9	2015-2017	TRUE
FALSE	YES	YES	FALSE	TRUE	FALSE	1000-1999	0-9	0-9	30-39	30-39	2012-2014	TRUE
FALSE	YES	YES	FALSE	FALSE	FALSE	6000-6999	20000-29999	0-9	700-799	100-199	2009-2011	FALSE
FALSE	YES	NO	FALSE	TRUE	FALSE	3000-3999	0-9	0-9	10-19	30-39	2012-2014	TRUE
FALSE	YES	YES	FALSE	FALSE	TRUE	20000-29999	20000-29999	10-19	200-299	300-399	2015-2017	FALSE
FALSE	NO	NO	FALSE	TRUE	FALSE	9000-9999	0-9	0-9	0-9	0-9	2015-2017	TRUE
FALSE	YES	NO	FALSE	FALSE	FALSE	1000-1999	10-19	0-9	0-9	10-19	2012-2014	TRUE
FALSE	YES	NO	FALSE	TRUE	FALSE	1000-1999	0-9	0-9	0-9	10-19	2009-2011	TRUE
FALSE	YES	YES	TRUE	FALSE	FALSE	1000-1999	3000-3999	0-9	100-199	100-199	2009-2011	FALSE
FALSE	NO	NO	FALSE	TRUE	FALSE	9000-9999	0-9	0-9	20-29	0-9	2015-2017	TRUE
FALSE	YES	NO	FALSE	TRUE	FALSE	4000-4999	0-9	0-9	0-9	30-39	2012-2014	TRUE
FALSE	YES	NO	FALSE	TRUE	FALSE	2000-2999	0-9	0-9	0-9	10-19	2009-2011	TRUE
TRUE	YES	YES	TRUE	TRUE	TRUE	10000-19999	9000-9999	0-9	200-299	200-299	2012-2014	FALSE
FALSE	YES	YES	FALSE	TRUE	FALSE	2000-2999	0-9	0-9	0-9	10-19	2009-2011	TRUE
FALSE	NO	NO	FALSE	TRUE	FALSE	9000-9999	0-9	0-9	0-9	0-9	2015-2017	TRUE
FALSE	YES	NO	FALSE	TRUE	FALSE	4000-4999	0-9	0-9	0-9	30-39	2009-2011	TRUE
FALSE	YES	NO	FALSE	TRUE	FALSE	2000-2999	0-9	0-9	10-19	0-9	2009-2011	TRUE
FALSE	YES	NO	FALSE	TRUE	FALSE	2000-2999	0-9	0-9	0-9	40-49	2009-2011	TRUE
TRUE	NO	NO	FALSE	TRUE	FALSE	10000-19999	20000-29999	50-59	200-299	6000-6999	2015-2017	FALSE
FALSE	YES	NO	FALSE	TRUE	FALSE	3000-3999	0-9	0-9	70-79	10-19	2012-2014	TRUE
FALSE	YES	NO	FALSE	TRUE	FALSE	2000-2999	0-9	0-9	0-9	10-19	2009-2011	TRUE
TRUE	NO	NO	FALSE	TRUE	FALSE	100000-1999999	0-9	80-89	400-499	10000-19999	2015-2017	FALSE
FALSE	YES	NO	FALSE	TRUE	FALSE	1000-1999	0-9	0-9	10-19	20-29	2012-2014	TRUE
FALSE	YES	NO	FALSE	TRUE	FALSE	1000-1999	0-9	0-9	0-9	40-49	2015-2017	TRUE
FALSE	YES	NO	FALSE	FALSE	FALSE	3000-3999	20-29	0-9	20-29	40-49	2012-2014	TRUE
TRUE	NO	NO	FALSE	TRUE	FALSE	100000-1999999	0-9	80-89	400-499	10000-19999	2015-2017	FALSE
FALSE	YES	NO	FALSE	TRUE	FALSE	2000-2999	0-9	0-9	0-9	10-19	2009-2011	TRUE
TRUE	NO	NO	FALSE	TRUE	FALSE	10000-19999	0-9	20-29	90-99	100-199	2015-2017	FALSE
FALSE	YES	NO	FALSE	TRUE	FALSE	2000-2999	0-9	0-9	0-9	20-29	2009-2011	TRUE
FALSE	YES	YES	TRUE	FALSE	TRUE	30000-39999	10000-19999	0-9	400-499	400-499	2009-2011	FALSE
FALSE	YES	YES	FALSE	TRUE	FALSE	1000-1999	0-9	0-9	0-9	10-19	2009-2011	TRUE
FALSE	YES	NO	FALSE	TRUE	FALSE	3000-3999	0-9	0-9	0-9	20-29	2012-2014	TRUE
FALSE	YES	YES	TRUE	TRUE	FALSE	1000-1999	0-9	0-9	40-49	10-19	2009-2011	TRUE
FALSE	YES	NO	FALSE	TRUE	FALSE	2000-2999	0-9	0-9	10-19	10-19	2012-2014	TRUE
FALSE	YES	YES	FALSE	TRUE	FALSE	2000-2999	0-9	0-9	0-9	20-29	2012-2014	TRUE
TRUE	NO	NO	FALSE	TRUE	FALSE	100000-1999999	0-9	100-199	300-399	30000-39999	2015-2017	FALSE
FALSE	YES	NO	FALSE	TRUE	FALSE	1000-1999	0-9	0-9	0-9	0-9	2012-2014	TRUE
FALSE	YES	YES	TRUE	FALSE	TRUE	100000-1999999	3000-3999	30-39	1000-1999	1000-1999	2009-2011	FALSE
FALSE	YES	YES	FALSE	FALSE	FALSE	2000-2999	0-9	0-9	50-59	50-59	2009-2011	TRUE
FALSE	YES	YES	TRUE	TRUE	TRUE	1000-1999	40-49	0-9	80-89	70-79	2009-2011	FALSE
TRUE	NO	NO	FALSE	TRUE	FALSE	100000-1999999	0-9	100-199	300-399	30000-39999	2015-2017	FALSE
TRUE	NO	NO	FALSE	TRUE	FALSE	100000-1999999	10-19	40-49	800-899	7000-7999	2015-2017	FALSE
TRUE	NO	NO	FALSE	FALSE	FALSE	70000-79999	1000-1999	900-999	2000-2999	100000-1999999	2012-2014	FALSE
TRUE	NO	NO	FALSE	TRUE	FALSE	100000-1999999	10-19	40-49	800-899	7000-7999	2015-2017	FALSE
FALSE	YES	NO	FALSE	TRUE	FALSE	2000-2999	0-9	0-9	100-199	20-29	2009-2011	TRUE
FALSE	YES	NO	FALSE	TRUE	FALSE	3000-3999	0-9	0-9	10-19	30-39	2012-2014	TRUE
TRUE	NO	NO	FALSE	TRUE	FALSE	100000-1999999	10-19	40-49	800-899	7000-7999	2015-2017	FALSE
TRUE	YES	NO	FALSE	TRUE	TRUE	4000-4999	3000-3999	0-9	800-899	100-199	2015-2017	FALSE
FALSE	YES	NO	FALSE	TRUE	FALSE	1000-1999	0-9	0-9	30-39	30-39	2012-2014	TRUE
FALSE	YES	NO	FALSE	TRUE	FALSE	1000-1999	0-9	0-9	0-9	10-19	2012-2014	TRUE
FALSE	YES	NO	FALSE	TRUE	FALSE	1000-1999	0-9	0-9	10-19	0-9	2012-2014	TRUE
TRUE	YES	YES	FALSE	TRUE	TRUE	1000-1999	200-299	0-9	3000-3999	200-299	2015-2017	FALSE
FALSE	YES	NO	FALSE	TRUE	FALSE	2000-2999	0-9	0-9	0-9	10-19	2012-2014	TRUE
FALSE	YES	NO	FALSE	FALSE	FALSE	2000-2999	0-9	0-9	0-9	10-19	2012-2014	TRUE
TRUE	NO	NO	FALSE	FALSE	FALSE	90000-99999	0-9	400-499	900-999	70000-79999	2012-2014	FALSE
FALSE	YES	YES	FALSE	FALSE	FALSE	3000-3999	0-9	0-9	100-199	400-499	2009-2011	TRUE
FALSE	YES	NO	FALSE	TRUE	FALSE	2000-2999	0-9	0-9	0-9	20-29	2009-2011	TRUE
FALSE	YES	NO	FALSE	FALSE	FALSE	3000-3999	20-29	0-9	200-299	100-199	2012-2014	TRUE
FALSE	YES	NO	FALSE	TRUE	FALSE	1000-1999	0-9	0-9	0-9	0-9	2009-2011	TRUE
FALSE	YES	NO	TRUE	TRUE	FALSE	2000-2999	0-9	0-9	0-9	0-9	2012-2014	TRUE
FALSE	YES	YES	FALSE	TRUE	FALSE	300-399	0-9	0-9	0-9	0-9	2015-2017	TRUE
FALSE	YES	YES	FALSE	FALSE	TRUE	0-99	100-199	0-9	50-59	10-19	2012-2014	FALSE
FALSE	YES	NO	FALSE	TRUE	FALSE	1000-1999	0-9	0-9	10-19	10-19	2015-2017	TRUE
FALSE	YES	NO	FALSE	TRUE	FALSE	1000-1999	0-9	0-9	0-9	20-29	2009-2011	TRUE
FALSE	YES	NO	FALSE	TRUE	FALSE	2000-2999	0-9	0-9	100-199	60-69	2012-2014	TRUE
FALSE	YES	YES	TRUE	FALSE	FALSE	2000-2999	0-9	0-9	10-19	20-29	2009-2011	TRUE
FALSE	YES	NO	FALSE	TRUE	FALSE	2000-2999	0-9	0-9	0-9	20-29	2009-2011	TRUE
TRUE	YES	NO	FALSE	TRUE	TRUE	2000-2999	0-9	0-9	4000-4999	800-899	2015-2017	FALSE
FALSE	YES	YES	FALSE	FALSE	FALSE	10000-19999	100-199	0-9	800-899	600-699	2012-2014	TRUE
FALSE	YES	NO	FALSE	TRUE	FALSE	2000-2999	0-9	0-9	0-9	20-29	2009-2011	TRUE
FALSE	YES	NO	FALSE	TRUE	FALSE	1000-1999	0-9	0-9	20-29	20-29	2012-2014	TRUE
TRUE	YES	NO	FALSE	FALSE	TRUE	2000-2999	2000-2999	0-9	100-199	600-699	2015-2017	FALSE
FALSE	YES	NO	FALSE	TRUE	FALSE	2000-2999	0-9	0-9	0-9	20-29	2009-2011	TRUE
TRUE	YES	NO	FALSE	TRUE	TRUE	0-99	0-9	0-9	90-99	40-49	2015-2017	FALSE
FALSE	YES	NO	FALSE	TRUE	FALSE	1000-1999	0-9	0-9	80-89	0-9	2015-2017	TRUE
FALSE	YES	NO	FALSE	TRUE	FALSE	1000-1999	0-9	0-9	0-9	0-9	2009-2011	TRUE
FALSE	YES	NO	FALSE	TRUE	FALSE	3000-3999	10-19	0-9	10-19	30-39	2009-2011	TRUE
FALSE	YES	YES	FALSE	TRUE	FALSE	2000-2999	50-59	0-9	90-99	70-79	2015-2017	TRUE
FALSE	YES	YES	TRUE	FALSE	FALSE	1000-1999	0-9	0-9	20-29	20-29	2012-2014	TRUE
FALSE	YES	YES	FALSE	TRUE	FALSE	2000-2999	0-9	0-9	20-29	20-29	2012-2014	TRUE
FALSE	YES	NO	FALSE	TRUE	FALSE	3000-3999	0-9	0-9	0-9	10-19	2012-2014	TRUE
FALSE	YES	NO	FALSE	TRUE	FALSE	2000-2999	0-9	0-9	20-29	10-19	2012-2014	TRUE
FALSE	YES	NO	FALSE	FALSE	FALSE	1000-1999	60-69	0-9	100-199	30-39	2012-2014	TRUE
FALSE	NO	YES	FALSE	FALSE	FALSE	4000-4999	0-9	100-199	10000-99999	10000-19999	2012-2014	TRUE
FALSE	YES	NO	FALSE	TRUE	FALSE	3000-3999	0-9	0-9	60-69	20-29	2015-2017	TRUE
TRUE	YES	YES	FALSE	TRUE	TRUE	800-899	0-9	0-9	400-499	20-29	2015-2017	FALSE
FALSE	YES	NO	FALSE	TRUE	FALSE	2000-2999	0-9	0-9	0-9	10-19	2012-2014	TRUE
FALSE	YES	NO	FALSE	TRUE	FALSE	3000-3999	3000-3999	0-9	500-599	80-89	2009-2011	FALSE
FALSE	YES	NO	FALSE	TRUE	FALSE	2000-2999	0-9	0-9	0-9	20-29	2012-2014	TRUE
FALSE	YES	YES	FALSE	FALSE	FALSE	1000-1999	10-19	0-9	20-29	30-39	2012-2014	TRUE
FALSE	YES	NO	FALSE	TRUE	FALSE	2000-2999	0-9	0-9	0-9	20-29	2009-2011	TRUE
FALSE	YES	NO	FALSE	TRUE	FALSE	1000-1999	0-9	0-9	0-9	0-9	2012-2014	TRUE
FALSE	YES	NO	FALSE	TRUE	FALSE	1000-1999	0-9	0-9	0-9	10-19	2012-2014	TRUE
FALSE	YES	YES	FALSE	FALSE	FALSE	1000-1999	0-9	0-9	0-9	10-19	2009-2011	TRUE
FALSE	YES	NO	TRUE	FALSE	TRUE	30000-39999	20000-29999	0-9	700-799	1000-1999	2012-2014	FALSE
FALSE	YES	NO	FALSE	TRUE	FALSE	1000-1999	0-9	0-9	0-9	10-19	2012-2014	TRUE
FALSE	YES	NO	TRUE	FALSE	FALSE	2000-2999	0-9	0-9	0-9	10-19	2009-2011	TRUE
FALSE	YES	NO	FALSE	TRUE	FALSE	2000-2999	0-9	0-9	10-19	10-19	2012-2014	TRUE
FALSE	YES	NO	FALSE	TRUE	FALSE	1000-1999	0-9	0-9	0-9	10-19	2009-2011	TRUE
FALSE	YES	NO	FALSE	TRUE	FALSE	1000-1999	0-9	0-9	0-9	0-9	2015-2017	TRUE
FALSE	YES	YES	FALSE	TRUE	FALSE	900-999	2000-2999	0-9	300-399	100-199	2015-2017	FALSE
TRUE	NO	NO	FALSE	FALSE	FALSE	8000-8999	1000-1999	10-19	1000-1999	6000-6999	2012-2014	FALSE
FALSE	YES	NO	FALSE	FALSE	FALSE	2000-2999	0-9	0-9	20-29	20-29	2009-2011	TRUE
FALSE	YES	NO	FALSE	TRUE	FALSE	2000-2999	60-69	0-9	100-199	60-69	2009-2011	TRUE
FALSE	YES	NO	FALSE	TRUE	FALSE	1000-1999	0-9	0-9	10-19	20-29	2009-2011	TRUE
FALSE	YES	NO	FALSE	FALSE	FALSE	2000-2999	0-9	0-9	0-9	10-19	2009-2011	TRUE
FALSE	YES	NO	FALSE	TRUE	FALSE	1000-1999	0-9	0-9	0-9	20-29	2012-2014	TRUE
FALSE	YES	NO	TRUE	TRUE	FALSE	2000-2999	3000-3999	0-9	10-19	10-19	2012-2014	TRUE
FALSE	YES	NO	FALSE	TRUE	FALSE	2000-2999	0-9	0-9	0-9	10-19	2012-2014	TRUE
FALSE	YES	NO	FALSE	TRUE	FALSE	1000-1999	0-9	0-9	20-29	20-29	2009-2011	TRUE
TRUE	NO	NO	FALSE	TRUE	FALSE	100000-1999999	10-19	100-199	700-799	20000-29999	2015-2017	FALSE
TRUE	YES	YES	FALSE	TRUE	TRUE	30000-39999	10000-19999	0-9	5000-5999	400-499	2015-2017	FALSE
FALSE	YES	YES	TRUE	FALSE	TRUE	20000-29999	10000-19999	10-19	400-499	200-299	2012-2014	FALSE
FALSE	YES	YES	FALSE	TRUE	FALSE	2000-2999	0-9	0-9	0-9	10-19	2009-2011	TRUE
FALSE	YES	YES	FALSE	FALSE	FALSE	1000-1999	0-9	0-9	0-9	10-19	2009-2011	TRUE
FALSE	YES	NO	FALSE	TRUE	FALSE	3000-3999	0-9	0-9	20-29	30-39	2009-2011	TRUE
FALSE	YES	NO	TRUE	FALSE	FALSE	8000-8999	500-599	10-19	1000-1999	400-499	2009-2011	TRUE
TRUE	YES	YES	FALSE	FALSE	TRUE	200-299	300-399	0-9	200-299	40-49	2015-2017	FALSE
FALSE	YES	NO	FALSE	TRUE	FALSE	2000-2999	0-9	0-9	20-29	20-29	2012-2014	TRUE
FALSE	YES	NO	FALSE	TRUE	FALSE	1000-1999	0-9	0-9	40-49	20-29	2012-2014	TRUE
FALSE	YES	NO	FALSE	TRUE	FALSE	1000-1999	0-9	0-9	0-9	0-9	2009-2011	TRUE
FALSE	YES	NO	FALSE	TRUE	FALSE	1000-1999	0-9	0-9	0-9	0-9	2012-2014	TRUE
TRUE	YES	NO	FALSE	TRUE	TRUE	700-799	2000-2999	0-9	800-899	200-299	2015-2017	FALSE
FALSE	YES	YES	FALSE	TRUE	TRUE	2000-2999	1000-1999	0-9	100-199	100-199	2015-2017	FALSE
FALSE	YES	NO	FALSE	TRUE	FALSE	3000-3999	0-9	0-9	50-59	40-49	2012-2014	TRUE
TRUE	NO	NO	FALSE	TRUE	FALSE	100000-1999999	0-9	100-199	300-399	30000-39999	2015-2017	FALSE
FALSE	YES	NO	FALSE	FALSE	FALSE	1000-1999	40-49	0-9	80-89	30-39	2012-2014	TRUE
TRUE	YES	NO	FALSE	TRUE	TRUE	2000-2999	50-59	10-19	1000-1999	900-999	2015-2017	FALSE
FALSE	YES	NO	FALSE	TRUE	FALSE	1000-1999	0-9	0-9	10-19	10-19	2012-2014	TRUE
FALSE	YES	NO	FALSE	TRUE	FALSE	2000-2999	0-9	0-9	0-9	30-39	2012-2014	TRUE
TRUE	NO	NO	FALSE	TRUE	FALSE	100000-1999999	0-9	100-199	300-399	30000-39999	2015-2017	FALSE
FALSE	YES	YES	TRUE	TRUE	FALSE	1000-1999	0-9	0-9	10-19	20-29	2009-2011	TRUE
TRUE	YES	YES	FALSE	TRUE	TRUE	100-199	30-39	0-9	300-399	90-99	2015-2017	FALSE
FALSE	YES	YES	TRUE	FALSE	FALSE	3000-3999	0-9	0-9	100-199	60-69	2009-2011	TRUE
FALSE	YES	NO	FALSE	TRUE	FALSE	2000-2999	0-9	0-9	0-9	10-19	2012-2014	TRUE
FALSE	YES	NO	FALSE	TRUE	FALSE	1000-1999	0-9	0-9	0-9	10-19	2012-2014	TRUE
FALSE	YES	NO	FALSE	FALSE	FALSE	1000-1999	0-9	0-9	0-9	10-19	2009-2011	TRUE
TRUE	NO	NO	FALSE	TRUE	FALSE	4000-4999	0-9	0-9	0-9	1000-1999	2015-2017	FALSE
TRUE	YES	NO	FALSE	TRUE	TRUE	900-999	300-399	0-9	90-99	50-59	2015-2017	FALSE
FALSE	YES	NO	FALSE	TRUE	FALSE	1000-1999	0-9	0-9	0-9	10-19	2009-2011	TRUE
FALSE	YES	YES	TRUE	TRUE	FALSE	3000-3999	0-9	0-9	0-9	30-39	2009-2011	TRUE
FALSE	YES	NO	FALSE	TRUE	FALSE	2000-2999	0-9	0-9	0-9	30-39	2009-2011	TRUE
FALSE	YES	NO	FALSE	TRUE	FALSE	1000-1999	0-9	0-9	80-89	10-19	2012-2014	TRUE
TRUE	NO	NO	FALSE	FALSE	FALSE	7000-7999	0-9	0-9	0-9	2000-2999	2015-2017	FALSE
FALSE	YES	YES	FALSE	TRUE	FALSE	2000-2999	0-9	0-9	10-19	20-29	2012-2014	TRUE
FALSE	YES	NO	FALSE	TRUE	FALSE	2000-2999	0-9	0-9	10-19	10-19	2012-2014	FALSE
FALSE	YES	YES	TRUE	FALSE	TRUE	100000-1999999	500-599	10-19	3000-3999	4000-4999	2009-2011	FALSE
FALSE	YES	NO	FALSE	TRUE	FALSE	4000-4999	0-9	0-9	0-9	30-39	2012-2014	TRUE
TRUE	YES	NO	FALSE	TRUE	TRUE	2000-2999	0-9	0-9	4000-4999	800-899	2015-2017	FALSE
FALSE	YES	YES	TRUE	TRUE	FALSE	20000-29999	1000-1999	10-19	2000-2999	900-999	2012-2014	FALSE
FALSE	YES	NO	FALSE	TRUE	FALSE	1000-1999	0-9	0-9	10-19	0-9	2015-2017	TRUE
FALSE	YES	NO	FALSE	TRUE	FALSE	4000-4999	0-9	0-9	0-9	30-39	2009-2011	TRUE
FALSE	YES	YES	TRUE	FALSE	FALSE	10000-19999	10000-19999	0-9	300-399	200-299	2009-2011	TRUE
FALSE	YES	NO	FALSE	TRUE	FALSE	1000-1999	0-9	0-9	10-19	10-19	2009-2011	TRUE
FALSE	NO	YES	FALSE	TRUE	FALSE	10000-19999	10000-19999	20-29	200-299	300-399	2009-2011	FALSE
FALSE	YES	NO	FALSE	TRUE	FALSE	2000-2999	0-9	0-9	0-9	0-9	2009-2011	TRUE
FALSE	YES	NO	FALSE	TRUE	FALSE	2000-2999	0-9	0-9	20-29	20-29	2012-2014	TRUE
TRUE	NO	NO	FALSE	TRUE	FALSE	6000-6999	0-9	0-9	0-9	600-699	2015-2017	FALSE
FALSE	YES	NO	FALSE	TRUE	FALSE	3000-3999	0-9	0-9	0-9	20-29	2009-2011	TRUE
FALSE	YES	NO	FALSE	TRUE	FALSE	2000-2999	0-9	0-9	0-9	10-19	2009-2011	TRUE
FALSE	YES	YES	TRUE	TRUE	FALSE	1000-1999	0-9	0-9	60-69	30-39	2012-2014	TRUE
TRUE	YES	NO	FALSE	TRUE	TRUE	700-799	1000-1999	0-9	500-599	800-899	2015-2017	FALSE
FALSE	YES	YES	TRUE	FALSE	TRUE	20000-29999	20000-29999	700-799	200-299	30000-39999	2006-2008	FALSE
FALSE	YES	NO	FALSE	FALSE	FALSE	9000-9999	20-29	0-9	200-299	100-199	2009-2011	TRUE
FALSE	YES	YES	FALSE	FALSE	FALSE	1000-1999	0-9	0-9	20-29	10-19	2009-2011	TRUE
FALSE	YES	NO	FALSE	TRUE	FALSE	2000-2999	10-19	0-9	20-29	20-29	2012-2014	TRUE
FALSE	YES	NO	FALSE	TRUE	FALSE	2000-2999	0-9	0-9	0-9	0-9	2015-2017	TRUE
FALSE	YES	NO	FALSE	TRUE	FALSE	1000-1999	10-19	0-9	0-9	0-9	2012-2014	TRUE
FALSE	YES	NO	FALSE	TRUE	FALSE	3000-3999	30-39	0-9	40-49	20-29	2012-2014	TRUE
FALSE	YES	NO	FALSE	TRUE	FALSE	2000-2999	30-39	0-9	200-299	200-299	2015-2017	TRUE
FALSE	YES	NO	FALSE	TRUE	FALSE	2000-2999	30-39	0-9	0-9	10-19	2012-2014	TRUE
FALSE	YES	NO	FALSE	TRUE	FALSE	1000-1999	20-29	0-9	30-39	20-29	2012-2014	TRUE
FALSE	YES	NO	FALSE	TRUE	FALSE	3000-3999	40-49	0-9	0-9	20-29	2009-2011	TRUE
FALSE	YES	NO	FALSE	TRUE	FALSE	1000-1999	10-19	0-9	0-9	20-29	2012-2014	TRUE
FALSE	YES	NO	FALSE	TRUE	FALSE	2000-2999	0-9	0-9	0-9	10-19	2009-2011	TRUE
FALSE	YES	NO	FALSE	TRUE	FALSE	2000-2999	0-9	0-9	0-9	10-19	2009-2011	TRUE
FALSE	NO	NO	FALSE	TRUE	FALSE	30000-39999	900-999	30-39	1000-1999	1000-1999	2012-2014	FALSE
FALSE	YES	NO	FALSE	TRUE	FALSE	2000-2999	10-19	0-9	100-199	100-199	2012-2014	TRUE
FALSE	YES	YES	FALSE	FALSE	FALSE	2000-2999	10-19	0-9	100-199	70-79	2012-2014	TRUE
TRUE	NO	NO	FALSE	TRUE	FALSE	100000-1999999	0-9	80-89	400-499	10000-19999	2015-2017	FALSE
FALSE	YES	NO	FALSE	TRUE	FALSE	3000-3999	0-9	0-9	0-9	20-29	2009-2011	TRUE
FALSE	NO	NO	FALSE	TRUE	FALSE	30000-39999	900-999	30-39	1000-1999	1000-1999	2012-2014	FALSE
TRUE	NO	NO	FALSE	TRUE	FALSE	100000-1999999	0-9	80-89	400-499	10000-19999	2015-2017	FALSE
FALSE	YES	NO	FALSE	TRUE	TRUE	200-299	100-199	0-9	500-599	20-29	2015-2017	FALSE
FALSE	YES	NO	TRUE	TRUE	TRUE	30000-39999	10000-19999	0-9	500-599	1000-1999	2012-2014	FALSE
FALSE	YES	YES	TRUE	TRUE	TRUE	20000-29999	2000-2999	80-89	3000-3999	2000-2999	2012-2014	FALSE
FALSE	YES	YES	FALSE	TRUE	FALSE	2000-2999	0-9	0-9	20-29	10-19	2009-2011	TRUE
FALSE	YES	NO	FALSE	TRUE	FALSE	2000-2999	0-9	0-9	10-19	10-19	2009-2011	TRUE
FALSE	YES	NO	TRUE	FALSE	TRUE	5000-5999	6000-6999	0-9	400-499	900-999	2012-2014	FALSE
FALSE	YES	YES	TRUE	FALSE	FALSE	1000-1999	30-39	0-9	0-9	20-29	2012-2014	TRUE
FALSE	YES	YES	FALSE	TRUE	FALSE	20000-29999	0-9	0-9	2000-2999	1000-1999	2015-2017	TRUE
FALSE	YES	YES	FALSE	TRUE	FALSE	1000-1999	0-9	0-9	20-29	10-19	2009-2011	TRUE
FALSE	YES	NO	TRUE	TRUE	FALSE	1000-1999	0-9	0-9	2000-2999	1000-1999	2015-2017	TRUE
FALSE	YES	YES	FALSE	TRUE	TRUE	0-99	20-29	0-9	80-89	0-9	2012-2014	FALSE
FALSE	YES	NO	FALSE	FALSE	FALSE	100000-1999999	0-9	0-9	200-299	1000-1999	2009-2011	FALSE
FALSE	YES	NO	TRUE	FALSE	TRUE	10000-19999	20000-29999	0-9	300-399	400-499	2015-2017	FALSE
TRUE	YES	YES	FALSE	TRUE	FALSE	4000-4999	0-9	0-9	40-49	10-19	2015-2017	FALSE
FALSE	YES	NO	FALSE	TRUE	FALSE	2000-2999	0-9	0-9	0-9	20-29	2012-2014	FALSE
FALSE	YES	NO	FALSE	TRUE	TRUE	2000-2999	0-9	0-9	4000-4999	800-899	2015-2017	TRUE
TRUE	YES	NO	FALSE	TRUE	FALSE	1000-1999	0-9	0-9	20-29	20-29	2015-2017	FALSE
FALSE	YES	YES	FALSE	TRUE	TRUE	200-299	100-199	0-9	700-799	100-199	2015-2017	TRUE
TRUE	YES	NO	FALSE	TRUE	FALSE	1000-1999	0-9	0-9	10-19	0-9	2015-2017	FALSE
TRUE	YES	NO	FALSE	TRUE	FALSE	3000-3999	0-9	0-9	0-9	10-19	2012-2014	FALSE
TRUE	YES	NO	FALSE	TRUE	FALSE	2000-2999	0-9	0-9	0-9	10-19	2009-2011	FALSE
TRUE	YES	NO	FALSE	TRUE	FALSE	2000-2999	0-9	0-9	0-9	10-19	2009-2011	FALSE
FALSE	YES	NO	FALSE	TRUE	TRUE	3000-3999	3000-3999	0-9	1000-1999	200-299	2015-2017	TRUE
TRUE	YES	YES	TRUE	FALSE	FALSE	2000-2999	0-9	0-9	0-9	20-29	2012-2014	FALSE
FALSE	YES	YES	FALSE	TRUE	TRUE	7000-7999	10000-19999	10-19	200-299	500-599	2015-2017	TRUE
TRUE	YES	NO	FALSE	TRUE	FALSE	1000-1999	0-9	0-9	30-39	10-19	2012-2014	FALSE
TRUE	YES	YES	FALSE	TRUE	FALSE	4000-4999	0-9	0-9	2000-2999	300-399	2009-2011	FALSE
TRUE	YES	NO	FALSE	TRUE	FALSE	2000-2999	0-9	0-9	0-9	10-19	2009-2011	FALSE
FALSE	YES	NO	FALSE	TRUE	TRUE	90000-99999	70000-79999	100-199	400-499	1000-1999	2009-2011	TRUE
TRUE	YES	NO	FALSE	TRUE	FALSE	3000-3999	0-9	0-9	0-9	10-19	2009-2011	FALSE
TRUE	YES	NO	FALSE	TRUE	FALSE	1000-1999	0-9	0-9	30-39	10-19	2012-2014	FALSE
TRUE	YES	NO	FALSE	TRUE	FALSE	4000-4999	50-59	0-9	1000-1999	300-399	2009-2011	FALSE
TRUE	YES	NO	FALSE	TRUE	FALSE	1000-1999	0-9	0-9	0-9	10-19	2012-2014	FALSE
TRUE	YES	NO	FALSE	TRUE	FALSE	2000-2999	0-9	0-9	0-9	10-19	2012-2014	FALSE
FALSE	YES	NO	FALSE	TRUE	TRUE	2000-2999	0-9	0-9	4000-4999	800-899	2015-2017	TRUE
TRUE	YES	NO	FALSE	FALSE	FALSE	1000-1999	0-9	0-9	0-9	10-19	2012-2014	FALSE
FALSE	YES	NO	FALSE	TRUE	TRUE	3000-3999	3000-3999	0-9	1000-1999	200-299	2015-2017	TRUE
TRUE	YES	YES	FALSE	TRUE	FALSE	1000-1999	0-9	0-9	10-19	10-19	2009-2011	FALSE
FALSE	YES	YES	TRUE	FALSE	TRUE	10000-19999	2000-2999	10-19	400-499	800-899	2009-2011	FALSE
TRUE	YES	YES	TRUE	FALSE	FALSE	20000-29999	70-79	0-9	400-499	500-599	2009-2011	FALSE
FALSE	YES	YES	TRUE	FALSE	TRUE	20000-29999	10000-19999	0-9	200-299	400-499	2009-2011	FALSE
TRUE	YES	NO	FALSE	TRUE	FALSE	1000-1999	0-9	0-9	0-9	10-19	2012-2014	FALSE
TRUE	YES	YES	FALSE	TRUE	FALSE	2000-2999	0-9	0-9	0-9	10-19	2009-2011	FALSE
FALSE	YES	YES	FALSE	TRUE	TRUE	8000-8999	20000-29999	10-19	1000-1999	200-299	2015-2017	TRUE
TRUE	YES	NO	FALSE	TRUE	FALSE	2000-2999	0-9	0-9	0-9	10-19	2009-2011	FALSE
TRUE	YES	NO	FALSE	TRUE	FALSE	1000-1999	0-9	0-9	0-9	10-19	2012-2014	FALSE
TRUE	YES	NO	FALSE	TRUE	FALSE	2000-2999	0-9	0-9	40-49	50-59	2012-2014	FALSE
FALSE	YES	NO	FALSE	TRUE	TRUE	1000-1999	9000-9999	0-9	500-599	100-199	2015-2017	TRUE
TRUE	YES	NO	FALSE	TRUE	FALSE	1000-1999	0-9	0-9	10-19	20-29	2009-2011	FALSE
TRUE	YES	NO	FALSE	TRUE	FALSE	2000-2999	0-9	0-9	0-9	20-29	2009-2011	FALSE
TRUE	YES	NO	FALSE	TRUE	FALSE	2000-2999	0-9	0-9	0-9	10-19	2012-2014	FALSE
TRUE	YES	NO	FALSE	TRUE	FALSE	3000-3999	0-9	0-9	0-9	20-29	2012-2014	FALSE
TRUE	YES	NO	FALSE	TRUE	FALSE	1000-1999	0-9	0-9	20-29	20-29	2015-2017	FALSE
FALSE	YES	NO	TRUE	FALSE	FALSE	10000-19999	20000-29999	100-199	700-799	20000-29999	2009-2011	FALSE
TRUE	YES	YES	FALSE	FALSE	FALSE	2000-2999	0-9	0-9	20-29	60-69	2009-2011	FALSE
TRUE	YES	NO	FALSE	TRUE	FALSE	1000-1999	0-9	0-9	0-9	20-29	2009-2011	FALSE
TRUE	YES	NO	FALSE	TRUE	FALSE	1000-1999	0-9	0-9	0-9	0-9	2012-2014	FALSE
TRUE	YES	YES	FALSE	FALSE	FALSE	1000-1999	70-79	0-9	500-599	100-199	2009-2011	FALSE
TRUE	YES	NO	FALSE	TRUE	FALSE	1000-1999	0-9	0-9	0-9	0-9	2009-2011	FALSE
TRUE	YES	YES	FALSE	TRUE	FALSE	1000-1999	0-9	0-9	50-59	10-19	2015-2017	FALSE
TRUE	YES	NO	FALSE	TRUE	FALSE	2000-2999	0-9	0-9	10-19	20-29	2012-2014	FALSE
FALSE	YES	NO	FALSE	TRUE	FALSE	2000-2999	6000-6999	600-699	100-199	100000-1999999	2015-2017	TRUE
TRUE	NO	NO	FALSE	TRUE	FALSE	9000-9999	0-9	0-9	0-9	0-9	2015-2017	FALSE
TRUE	YES	YES	FALSE	FALSE	FALSE	2000-2999	0-9	0-9	500-599	10-19	2009-2011	FALSE
TRUE	YES	NO	FALSE	TRUE	FALSE	2000-2999	0-9	0-9	10-19	10-19	2009-2011	FALSE
TRUE	YES	NO	FALSE	TRUE	FALSE	2000-2999	0-9	0-9	30-39	30-39	2012-2014	FALSE
FALSE	YES	NO	TRUE	TRUE	FALSE	30000-39999	10000-19999	0-9	500-599	1000-1999	2012-2014	FALSE
TRUE	YES	YES	FALSE	FALSE	FALSE	4000-4999	0-9	0-9	100-199	50-59	2012-2014	FALSE
TRUE	NO	NO	FALSE	TRUE	FALSE	9000-9999	0-9	0-9	0-9	0-9	2015-2017	FALSE
FALSE	YES	NO	FALSE	TRUE	FALSE	1000-1999	0-9	0-9	20-29	10-19	2012-2014	TRUE
FALSE	YES	NO	FALSE	TRUE	FALSE	2000-2999	0-9	0-9	100-199	0-9	2009-2011	TRUE
FALSE	YES	YES	FALSE	TRUE	FALSE	2000-2999	0-9	0-9	0-9	20-29	2012-2014	TRUE
FALSE	YES	NO	FALSE	TRUE	FALSE	3000-3999	0-9	0-9	0-9	40-49	2009-2011	TRUE
FALSE	YES	NO	FALSE	TRUE	FALSE	1000-1999	0-9	0-9	0-9	10-19	2012-2014	TRUE
FALSE	YES	YES	FALSE	TRUE	TRUE	3000-3999	4000-4999	0-9	200-299	20-29	2015-2017	TRUE
FALSE	NO	NO	FALSE	TRUE	FALSE	9000-9999	0-9	0-9	0-9	0-9	2015-2017	TRUE
FALSE	YES	NO	FALSE	TRUE	TRUE	2000-2999	10000-19999	0-9	1000-1999	100-199	2015-2017	TRUE
FALSE	YES	YES	FALSE	FALSE	FALSE	20000-29999	6000-6999	0-9	600-699	20-29	2009-2011	FALSE
FALSE	YES	NO	TRUE	FALSE	FALSE	30000-39999	10000-19999	0-9	100-199	200-299	2012-2014	TRUE
FALSE	YES	YES	FALSE	FALSE	TRUE	3000-3999	200-299	0-9	100-199	70-79	2009-2011	FALSE
FALSE	YES	NO	TRUE	FALSE	FALSE	10000-19999	500-599	0-9	300-399	100-199	2009-2011	TRUE
TRUE	YES	NO	FALSE	TRUE	TRUE	600-699	7000-7999	0-9	4000-4999	500-599	2012-2014	FALSE
FALSE	YES	YES	TRUE	TRUE	FALSE	5000-5999	200-299	0-9	50-59	100-199	2009-2011	TRUE
FALSE	YES	YES	TRUE	FALSE	FALSE	2000-2999	0-9	0-9	100-199	80-89	2009-2011	TRUE
FALSE	YES	NO	FALSE	TRUE	FALSE	1000-1999	0-9	0-9	10-19	10-19	2012-2014	TRUE
FALSE	YES	YES	FALSE	TRUE	FALSE	4000-4999	0-9	0-9	4000-4999	400-499	2015-2017	TRUE
FALSE	YES	NO	FALSE	TRUE	FALSE	1000-1999	0-9	0-9	0-9	20-29	2012-2014	TRUE
FALSE	YES	NO	FALSE	TRUE	FALSE	1000-1999	0-9	0-9	0-9	10-19	2009-2011	TRUE
FALSE	NO	NO	FALSE	TRUE	FALSE	9000-9999	0-9	0-9	0-9	0-9	2015-2017	TRUE
TRUE	YES	NO	FALSE	TRUE	TRUE	3000-3999	3000-3999	0-9	1000-1999	200-299	2015-2017	FALSE
FALSE	YES	NO	FALSE	FALSE	FALSE	1000-1999	20-29	0-9	200-299	100-199	2009-2011	TRUE
FALSE	YES	NO	FALSE	TRUE	FALSE	2000-2999	0-9	0-9	0-9	10-19	2009-2011	TRUE
FALSE	YES	YES	FALSE	TRUE	FALSE	1000-1999	0-9	0-9	0-9	10-19	2015-2017	TRUE
FALSE	YES	NO	FALSE	TRUE	FALSE	2000-2999	0-9	0-9	0-9	0-9	2009-2011	TRUE
TRUE	YES	NO	FALSE	TRUE	TRUE	90000-99999	70000-79999	100-199	400-499	1000-1999	2009-2011	FALSE
FALSE	YES	NO	FALSE	TRUE	FALSE	2000-2999	0-9	0-9	0-9	10-19	2009-2011	TRUE
FALSE	YES	NO	FALSE	TRUE	FALSE	2000-2999	0-9	0-9	0-9	20-29	2009-2011	TRUE
FALSE	NO	NO	FALSE	TRUE	FALSE	9000-9999	0-9	0-9	20-29	0-9	2015-2017	TRUE
FALSE	YES	YES	FALSE	TRUE	FALSE	1000-1999	0-9	0-9	30-39	30-39	2012-2014	TRUE
FALSE	YES	YES	FALSE	FALSE	FALSE	6000-6999	20000-29999	0-9	700-799	100-199	2009-2011	FALSE
FALSE	YES	NO	FALSE	TRUE	FALSE	3000-3999	0-9	0-9	10-19	30-39	2012-2014	TRUE
FALSE	YES	YES	FALSE	FALSE	TRUE	20000-29999	20000-29999	10-19	200-299	300-399	2015-2017	FALSE
FALSE	NO	NO	FALSE	TRUE	FALSE	9000-9999	0-9	0-9	0-9	0-9	2015-2017	TRUE
FALSE	YES	NO	FALSE	FALSE	FALSE	1000-1999	10-19	0-9	0-9	10-19	2012-2014	TRUE
FALSE	YES	NO	FALSE	TRUE	FALSE	1000-1999	0-9	0-9	0-9	10-19	2009-2011	TRUE
FALSE	YES	YES	TRUE	FALSE	FALSE	1000-1999	3000-3999	0-9	100-199	100-199	2009-2011	FALSE
FALSE	NO	NO	FALSE	TRUE	FALSE	9000-9999	0-9	0-9	20-29	0-9	2015-2017	TRUE
FALSE	YES	NO	FALSE	TRUE	FALSE	4000-4999	0-9	0-9	0-9	30-39	2012-2014	TRUE
FALSE	YES	NO	FALSE	TRUE	FALSE	2000-2999	0-9	0-9	0-9	10-19	2009-2011	TRUE
TRUE	YES	YES	TRUE	TRUE	TRUE	10000-19999	9000-9999	0-9	200-299	200-299	2012-2014	FALSE
FALSE	YES	YES	FALSE	TRUE	FALSE	2000-2999	0-9	0-9	0-9	10-19	2009-2011	TRUE
FALSE	NO	NO	FALSE	TRUE	FALSE	9000-9999	0-9	0-9	0-9	0-9	2015-2017	TRUE
FALSE	YES	NO	FALSE	TRUE	FALSE	4000-4999	0-9	0-9	0-9	30-39	2009-2011	TRUE
FALSE	YES	NO	FALSE	TRUE	FALSE	2000-2999	0-9	0-9	10-19	0-9	2009-2011	TRUE
FALSE	YES	NO	FALSE	TRUE	FALSE	2000-2999	0-9	0-9	0-9	40-49	2009-2011	TRUE
TRUE	NO	NO	FALSE	TRUE	FALSE	10000-19999	20000-29999	50-59	200-299	6000-6999	2015-2017	FALSE
FALSE	YES	NO	FALSE	TRUE	FALSE	3000-3999	0-9	0-9	70-79	10-19	2012-2014	TRUE
FALSE	YES	NO	FALSE	TRUE	FALSE	2000-2999	0-9	0-9	0-9	10-19	2009-2011	TRUE
TRUE	NO	NO	FALSE	TRUE	FALSE	100000-1999999	0-9	80-89	400-499	10000-19999	2015-2017	FALSE
FALSE	YES	NO	FALSE	TRUE	FALSE	1000-1999	0-9	0-9	10-19	20-29	2012-2014	TRUE
FALSE	YES	NO	FALSE	TRUE	FALSE	1000-1999	0-9	0-9	0-9	40-49	2015-2017	TRUE
FALSE	YES	NO	FALSE	FALSE	FALSE	3000-3999	20-29	0-9	20-29	40-49	2012-2014	TRUE
TRUE	NO	NO	FALSE	TRUE	FALSE	100000-1999999	0-9	80-89	400-499	10000-19999	2015-2017	FALSE
FALSE	YES	NO	FALSE	TRUE	FALSE	2000-2999	0-9	0-9	0-9	10-19	2009-2011	TRUE
TRUE	NO	NO	FALSE	TRUE	FALSE	10000-19999	0-9	20-29	90-99	100-199	2015-2017	FALSE
FALSE	YES	NO	FALSE	TRUE	FALSE	2000-2999	0-9	0-9	0-9	20-29	2009-2011	TRUE
FALSE	YES	YES	TRUE	FALSE	TRUE	30000-39999	10000-19999	0-9	400-499	400-499	2009-2011	FALSE
FALSE	YES	YES	FALSE	TRUE	FALSE	1000-1999	0-9	0-9	0-9	10-19	2009-2011	TRUE
FALSE	YES	NO	FALSE	TRUE	FALSE	3000-3999	0-9	0-9	0-9	20-29	2012-2014	TRUE
FALSE	YES	YES	TRUE	TRUE	FALSE	1000-1999	0-9	0-9	40-49	10-19	2009-2011	TRUE
FALSE	YES	NO	FALSE	TRUE	FALSE	2000-2999	0-9	0-9	10-19	10-19	2012-2014	TRUE
FALSE	YES	YES	FALSE	TRUE	FALSE	2000-2999	0-9	0-9	0-9	20-29	2012-2014	TRUE
TRUE	NO	NO	FALSE	TRUE	FALSE	100000-1999999	0-9	100-199	300-399	30000-39999	2015-2017	FALSE
FALSE	YES	NO	FALSE	TRUE	FALSE	1000-1999	0-9	0-9	0-9	0-9	2012-2014	TRUE
FALSE	YES	YES	TRUE	FALSE	TRUE	100000-1999999	3000-3999	30-39	1000-1999	1000-1999	2009-2011	FALSE
FALSE	YES	YES	FALSE	FALSE	FALSE	2000-2999	0-9	0-9	50-59	50-59	2009-2011	TRUE
FALSE	YES	YES	TRUE	TRUE	TRUE	1000-1999	40-49	0-9	80-89	70-79	2009-2011	FALSE
TRUE	NO	NO	FALSE	TRUE	FALSE	100000-1999999	0-9	100-199	300-399	30000-39999	2015-2017	FALSE
TRUE	NO	NO	FALSE	TRUE	FALSE	100000-1999999	10-19	40-49	800-899	7000-7999	2015-2017	FALSE
TRUE	NO	NO	FALSE	FALSE	FALSE	70000-79999	1000-1999	900-999	2000-2999	100000-1999999	2012-2014	FALSE
TRUE	NO	NO	FALSE	TRUE	FALSE	100000-1999999	10-19	40-49	800-899	7000-7999	2015-2017	FALSE
FALSE	YES	NO	FALSE	TRUE	FALSE	2000-2999	0-9	0-9	100-199	20-29	2009-2011	TRUE
FALSE	YES	NO	FALSE	TRUE	FALSE	3000-3999	0-9	0-9	10-19	30-39	2012-2014	TRUE
TRUE	NO	NO	FALSE	TRUE	FALSE	100000-1999999	10-19	40-49	800-899	7000-7999	2015-2017	FALSE
TRUE	YES	NO	FALSE	TRUE	TRUE	4000-4999	3000-3999	0-9	800-899	100-199	2015-2017	FALSE
FALSE	YES	NO	FALSE	TRUE	FALSE	1000-1999	0-9	0-9	30-39	30-39	2012-2014	TRUE
FALSE	YES	NO	FALSE	TRUE	FALSE	1000-1999	0-9	0-9	0-9	10-19	2012-2014	TRUE
FALSE	YES	NO	FALSE	TRUE	FALSE	1000-1999	0-9	0-9	10-19	0-9	2012-2014	TRUE
TRUE	YES	YES	FALSE	TRUE	TRUE	1000-1999	200-299	0-9	3000-3999	200-299	2015-2017	FALSE
FALSE	YES	NO	FALSE	TRUE	FALSE	2000-2999	0-9	0-9	0-9	10-19	2012-2014	TRUE
FALSE	YES	NO	FALSE	FALSE	FALSE	2000-2999	0-9	0-9	0-9	10-19	2012-2014	TRUE
TRUE	NO	NO	FALSE	FALSE	FALSE	90000-99999	0-9	400-499	900-999	70000-79999	2012-2014	FALSE
FALSE	YES	YES	FALSE	FALSE	FALSE	3000-3999	0-9	0-9	100-199	400-499	2009-2011	TRUE
FALSE	YES	NO	FALSE	TRUE	FALSE	2000-2999	0-9	0-9	0-9	20-29	2009-2011	TRUE
FALSE	YES	NO	FALSE	FALSE	FALSE	3000-3999	20-29	0-9	200-299	100-199	2012-2014	TRUE
FALSE	YES	NO	FALSE	TRUE	FALSE	1000-1999	0-9	0-9	0-9	0-9	2009-2011	TRUE
FALSE	YES	NO	TRUE	TRUE	FALSE	2000-2999	0-9	0-9	0-9	0-9	2012-2014	TRUE
FALSE	YES	YES	FALSE	TRUE	FALSE	300-399	0-9	0-9	0-9	0-9	2015-2017	TRUE
FALSE	YES	YES	FALSE	FALSE	TRUE	0-99	100-199	0-9	50-59	10-19	2012-2014	FALSE
FALSE	YES	NO	FALSE	TRUE	FALSE	1000-1999	0-9	0-9	10-19	10-19	2015-2017	TRUE
FALSE	YES	NO	FALSE	TRUE	FALSE	1000-1999	0-9	0-9	0-9	20-29	2009-2011	TRUE
FALSE	YES	NO	FALSE	TRUE	FALSE	2000-2999	0-9	0-9	100-199	60-69	2012-2014	TRUE
FALSE	YES	YES	TRUE	FALSE	FALSE	2000-2999	0-9	0-9	10-19	20-29	2009-2011	TRUE
FALSE	YES	NO	FALSE	TRUE	FALSE	2000-2999	0-9	0-9	0-9	20-29	2009-2011	TRUE
TRUE	YES	NO	FALSE	TRUE	TRUE	2000-2999	0-9	0-9	4000-4999	800-899	2015-2017	FALSE
FALSE	YES	YES	FALSE	FALSE	FALSE	10000-19999	100-199	0-9	800-899	600-699	2012-2014	TRUE
FALSE	YES	NO	FALSE	TRUE	FALSE	2000-2999	0-9	0-9	0-9	20-29	2009-2011	TRUE
FALSE	YES	NO	FALSE	TRUE	FALSE	1000-1999	0-9	0-9	20-29	20-29	2012-2014	TRUE
TRUE	YES	NO	FALSE	FALSE	TRUE	2000-2999	2000-2999	0-9	100-199	600-699	2015-2017	FALSE
FALSE	YES	NO	FALSE	TRUE	FALSE	2000-2999	0-9	0-9	0-9	20-29	2009-2011	TRUE
TRUE	YES	NO	FALSE	TRUE	TRUE	0-99	0-9	0-9	90-99	40-49	2015-2017	FALSE
FALSE	YES	NO	FALSE	TRUE	FALSE	1000-1999	0-9	0-9	80-89	0-9	2015-2017	TRUE
FALSE	YES	NO	FALSE	TRUE	FALSE	1000-1999	0-9	0-9	0-9	0-9	2009-2011	TRUE
FALSE	YES	NO	FALSE	TRUE	FALSE	3000-3999	10-19	0-9	10-19	30-39	2009-2011	TRUE
FALSE	YES	YES	FALSE	TRUE	FALSE	2000-2999	50-59	0-9	90-99	70-79	2015-2017	TRUE
FALSE	YES	YES	TRUE	FALSE	FALSE	1000-1999	0-9	0-9	20-29	20-29	2012-2014	TRUE
FALSE	YES	YES	FALSE	TRUE	FALSE	2000-2999	0-9	0-9	20-29	20-29	2012-2014	TRUE
FALSE	YES	NO	FALSE	TRUE	FALSE	3000-3999	0-9	0-9	0-9	10-19	2012-2014	TRUE
FALSE	YES	NO	FALSE	TRUE	FALSE	2000-2999	0-9	0-9	20-29	10-19	2012-2014	TRUE
FALSE	YES	NO	FALSE	FALSE	FALSE	1000-1999	60-69	0-9	100-199	30-39	2012-2014	TRUE
FALSE	NO	YES	FALSE	FALSE	FALSE	4000-4999	0-9	100-199	10000-99999	10000-19999	2012-2014	TRUE
FALSE	YES	NO	FALSE	TRUE	FALSE	3000-3999	0-9	0-9	60-69	20-29	2015-2017	TRUE
TRUE	YES	YES	FALSE	TRUE	TRUE	800-899	0-9	0-9	400-499	20-29	2015-2017	FALSE
FALSE	YES	NO	FALSE	TRUE	FALSE	2000-2999	0-9	0-9	0-9	10-19	2012-2014	TRUE
FALSE	YES	NO	FALSE	TRUE	FALSE	3000-3999	3000-3999	0-9	500-599	80-89	2009-2011	FALSE
FALSE	YES	NO	FALSE	TRUE	FALSE	2000-2999	0-9	0-9	0-9	20-29	2012-2014	TRUE
FALSE	YES	YES	FALSE	FALSE	FALSE	1000-1999	10-19	0-9	20-29	30-39	2012-2014	TRUE
FALSE	YES	NO	FALSE	TRUE	FALSE	2000-2999	0-9	0-9	0-9	20-29	2009-2011	TRUE
FALSE	YES	NO	FALSE	TRUE	FALSE	1000-1999	0-9	0-9	0-9	0-9	2012-2014	TRUE
FALSE	YES	NO	FALSE	TRUE	FALSE	1000-1999	0-9	0-9	0-9	10-19	2012-2014	TRUE
FALSE	YES	YES	FALSE	FALSE	FALSE	1000-1999	0-9	0-9	0-9	10-19	2009-2011	TRUE
FALSE	YES	NO	TRUE	FALSE	TRUE	30000-39999	20000-29999	0-9	700-799	1000-1999	2012-2014	FALSE
FALSE	YES	NO	FALSE	TRUE	FALSE	1000-1999	0-9	0-9	0-9	10-19	2012-2014	TRUE
FALSE	YES	NO	TRUE	FALSE	FALSE	2000-2999	0-9	0-9	0-9	10-19	2009-2011	TRUE
FALSE	YES	NO	FALSE	TRUE	FALSE	2000-2999	0-9	0-9	10-19	10-19	2012-2014	TRUE
FALSE	YES	NO	FALSE	TRUE	FALSE	1000-1999	0-9	0-9	0-9	10-19	2009-2011	TRUE
FALSE	YES	NO	FALSE	TRUE	FALSE	1000-1999	0-9	0-9	0-9	0-9	2015-2017	TRUE
FALSE	YES	YES	FALSE	TRUE	FALSE	900-999	2000-2999	0-9	300-399	100-199	2015-2017	FALSE
TRUE	NO	NO	FALSE	FALSE	FALSE	8000-8999	1000-1999	10-19	1000-1999	6000-6999	2012-2014	FALSE
FALSE	YES	NO	FALSE	FALSE	FALSE	2000-2999	0-9	0-9	20-29	20-29	2009-2011	TRUE
FALSE	YES	NO	FALSE	TRUE	FALSE	2000-2999	60-69	0-9	100-199	60-69	2009-2011	TRUE
FALSE	YES	NO	FALSE	TRUE	FALSE	1000-1999	0-9	0-9	10-19	20-29	2009-2011	TRUE
FALSE	YES	NO	FALSE	FALSE	FALSE	2000-2999	0-9	0-9	0-9	10-19	2009-2011	TRUE
FALSE	YES	NO	FALSE	TRUE	FALSE	1000-1999	0-9	0-9	0-9	20-29	2012-2014	TRUE
FALSE	YES	NO	TRUE	TRUE	FALSE	2000-2999	3000-3999	0-9	10-19	10-19	2012-2014	TRUE
FALSE	YES	NO	FALSE	TRUE	FALSE	2000-2999	0-9	0-9	0-9	10-19	2012-2014	TRUE
FALSE	YES	NO	FALSE	TRUE	FALSE	1000-1999	0-9	0-9	20-29	20-29	2009-2011	TRUE
TRUE	NO	NO	FALSE	TRUE	FALSE	100000-1999999	10-19	100-199	700-799	20000-29999	2015-2017	FALSE
TRUE	YES	YES	FALSE	TRUE	TRUE	30000-39999	10000-19999	0-9	5000-5999	400-499	2015-2017	FALSE
FALSE	YES	YES	TRUE	FALSE	TRUE	20000-29999	10000-19999	10-19	400-499	200-299	2012-2014	FALSE
FALSE	YES	YES	FALSE	TRUE	FALSE	2000-2999	0-9	0-9	0-9	10-19	2009-2011	TRUE
FALSE	YES	YES	FALSE	FALSE	FALSE	1000-1999	0-9	0-9	0-9	10-19	2009-2011	TRUE
FALSE	YES	NO	FALSE	TRUE	FALSE	3000-3999	0-9	0-9	20-29	30-39	2009-2011	TRUE
FALSE	YES	NO	TRUE	FALSE	FALSE	8000-8999	500-599	10-19	1000-1999	400-499	2009-2011	TRUE
TRUE	YES	YES	FALSE	FALSE	TRUE	200-299	300-399	0-9	200-299	40-49	2015-2017	FALSE
FALSE	YES	NO	FALSE	TRUE	FALSE	2000-2999	0-9	0-9	20-29	20-29	2012-2014	TRUE
FALSE	YES	NO	FALSE	TRUE	FALSE	1000-1999	0-9	0-9	40-49	20-29	2012-2014	TRUE
FALSE	YES	NO	FALSE	TRUE	FALSE	1000-1999	0-9	0-9	0-9	0-9	2009-2011	TRUE
FALSE	YES	NO	FALSE	TRUE	FALSE	1000-1999	0-9	0-9	0-9	0-9	2012-2014	TRUE
TRUE	YES	NO	FALSE	TRUE	TRUE	700-799	2000-2999	0-9	800-899	200-299	2015-2017	FALSE
FALSE	YES	YES	FALSE	TRUE	TRUE	2000-2999	1000-1999	0-9	100-199	100-199	2015-2017	FALSE
FALSE	YES	NO	FALSE	TRUE	FALSE	3000-3999	0-9	0-9	50-59	40-49	2012-2014	TRUE
TRUE	NO	NO	FALSE	TRUE	FALSE	100000-1999999	0-9	100-199	300-399	30000-39999	2015-2017	FALSE
FALSE	YES	NO	FALSE	FALSE	FALSE	1000-1999	40-49	0-9	80-89	30-39	2012-2014	TRUE
TRUE	YES	NO	FALSE	TRUE	TRUE	2000-2999	50-59	10-19	1000-1999	900-999	2015-2017	FALSE
FALSE	YES	NO	FALSE	TRUE	FALSE	1000-1999	0-9	0-9	10-19	10-19	2012-2014	TRUE
FALSE	YES	NO	FALSE	TRUE	FALSE	2000-2999	0-9	0-9	0-9	30-39	2012-2014	TRUE
TRUE	NO	NO	FALSE	TRUE	FALSE	100000-1999999	0-9	100-199	300-399	30000-39999	2015-2017	FALSE
FALSE	YES	YES	TRUE	TRUE	FALSE	1000-1999	0-9	0-9	10-19	20-29	2009-2011	TRUE
TRUE	YES	YES	FALSE	TRUE	TRUE	100-199	30-39	0-9	300-399	90-99	2015-2017	FALSE
FALSE	YES	YES	TRUE	FALSE	FALSE	3000-3999	0-9	0-9	100-199	60-69	2009-2011	TRUE
FALSE	YES	NO	FALSE	TRUE	FALSE	2000-2999	0-9	0-9	0-9	10-19	2012-2014	TRUE
FALSE	YES	NO	FALSE	TRUE	FALSE	1000-1999	0-9	0-9	0-9	10-19	2012-2014	TRUE
FALSE	YES	NO	FALSE	FALSE	FALSE	1000-1999	0-9	0-9	0-9	10-19	2009-2011	TRUE
TRUE	NO	NO	FALSE	TRUE	FALSE	4000-4999	0-9	0-9	0-9	1000-1999	2015-2017	FALSE
TRUE	YES	NO	FALSE	TRUE	TRUE	900-999	300-399	0-9	90-99	50-59	2015-2017	FALSE
FALSE	YES	NO	FALSE	TRUE	FALSE	1000-1999	0-9	0-9	0-9	10-19	2009-2011	TRUE
FALSE	YES	YES	TRUE	TRUE	FALSE	3000-3999	0-9	0-9	0-9	30-39	2009-2011	TRUE
FALSE	YES	NO	FALSE	TRUE	FALSE	2000-2999	0-9	0-9	0-9	30-39	2009-2011	TRUE
FALSE	YES	NO	FALSE	TRUE	FALSE	1000-1999	0-9	0-9	80-89	10-19	2012-2014	TRUE
TRUE	NO	NO	FALSE	FALSE	FALSE	7000-7999	0-9	0-9	0-9	2000-2999	2015-2017	FALSE
FALSE	YES	YES	FALSE	TRUE	FALSE	2000-2999	0-9	0-9	10-19	20-29	2012-2014	TRUE
FALSE	YES	NO	FALSE	TRUE	FALSE	2000-2999	0-9	0-9	10-19	10-19	2012-2014	FALSE
FALSE	YES	YES	TRUE	FALSE	TRUE	100000-1999999	500-599	10-19	3000-3999	4000-4999	2009-2011	FALSE
FALSE	YES	NO	FALSE	TRUE	FALSE	4000-4999	0-9	0-9	0-9	30-39	2012-2014	TRUE
TRUE	YES	NO	FALSE	TRUE	TRUE	2000-2999	0-9	0-9	4000-4999	800-899	2015-2017	FALSE
FALSE	YES	YES	TRUE	TRUE	FALSE	20000-29999	1000-1999	10-19	2000-2999	900-999	2012-2014	FALSE
FALSE	YES	NO	FALSE	TRUE	FALSE	1000-1999	0-9	0-9	10-19	0-9	2015-2017	TRUE
FALSE	YES	NO	FALSE	TRUE	FALSE	4000-4999	0-9	0-9	0-9	30-39	2009-2011	TRUE
FALSE	YES	YES	TRUE	FALSE	FALSE	10000-19999	10000-19999	0-9	300-399	200-299	2009-2011	TRUE
FALSE	YES	NO	FALSE	TRUE	FALSE	1000-1999	0-9	0-9	10-19	10-19	2009-2011	TRUE
FALSE	NO	YES	FALSE	TRUE	FALSE	10000-19999	10000-19999	20-29	200-299	300-399	2009-2011	FALSE
FALSE	YES	NO	FALSE	TRUE	FALSE	2000-2999	0-9	0-9	0-9	0-9	2009-2011	TRUE
FALSE	YES	NO	FALSE	TRUE	FALSE	2000-2999	0-9	0-9	20-29	20-29	2012-2014	TRUE
TRUE	NO	NO	FALSE	TRUE	FALSE	6000-6999	0-9	0-9	0-9	600-699	2015-2017	FALSE
FALSE	YES	NO	FALSE	TRUE	FALSE	3000-3999	0-9	0-9	0-9	20-29	2009-2011	TRUE
FALSE	YES	NO	FALSE	TRUE	FALSE	2000-2999	0-9	0-9	0-9	10-19	2009-2011	TRUE
FALSE	YES	YES	TRUE	TRUE	FALSE	1000-1999	0-9	0-9	60-69	30-39	2012-2014	TRUE
TRUE	YES	NO	FALSE	TRUE	TRUE	700-799	1000-1999	0-9	500-599	800-899	2015-2017	FALSE
FALSE	YES	YES	TRUE	FALSE	TRUE	20000-29999	20000-29999	700-799	200-299	30000-39999	2006-2008	FALSE
FALSE	YES	NO	FALSE	FALSE	FALSE	9000-9999	20-29	0-9	200-299	100-199	2009-2011	TRUE
FALSE	YES	YES	FALSE	FALSE	FALSE	1000-1999	0-9	0-9	20-29	10-19	2009-2011	TRUE
FALSE	YES	NO	FALSE	TRUE	FALSE	2000-2999	10-19	0-9	20-29	20-29	2012-2014	TRUE
FALSE	YES	NO	FALSE	TRUE	FALSE	2000-2999	0-9	0-9	0-9	0-9	2015-2017	TRUE
FALSE	YES	NO	FALSE	TRUE	FALSE	1000-1999	10-19	0-9	0-9	0-9	2012-2014	TRUE
FALSE	YES	NO	FALSE	TRUE	FALSE	3000-3999	30-39	0-9	40-49	20-29	2012-2014	TRUE
FALSE	YES	NO	FALSE	TRUE	FALSE	2000-2999	30-39	0-9	200-299	200-299	2015-2017	TRUE
FALSE	YES	NO	FALSE	TRUE	FALSE	2000-2999	30-39	0-9	0-9	10-19	2012-2014	TRUE
FALSE	YES	NO	FALSE	TRUE	FALSE	1000-1999	20-29	0-9	30-39	20-29	2012-2014	TRUE
FALSE	YES	NO	FALSE	TRUE	FALSE	3000-3999	40-49	0-9	0-9	20-29	2009-2011	TRUE
FALSE	YES	NO	FALSE	TRUE	FALSE	1000-1999	10-19	0-9	0-9	20-29	2012-2014	TRUE
FALSE	YES	NO	FALSE	TRUE	FALSE	2000-2999	0-9	0-9	0-9	10-19	2009-2011	TRUE
FALSE	YES	NO	FALSE	TRUE	FALSE	2000-2999	0-9	0-9	0-9	10-19	2009-2011	TRUE
FALSE	NO	NO	FALSE	TRUE	FALSE	30000-39999	900-999	30-39	1000-1999	1000-1999	2012-2014	FALSE
FALSE	YES	NO	FALSE	TRUE	FALSE	2000-2999	10-19	0-9	100-199	100-199	2012-2014	TRUE
FALSE	YES	YES	FALSE	FALSE	FALSE	2000-2999	10-19	0-9	100-199	70-79	2012-2014	TRUE
TRUE	NO	NO	FALSE	TRUE	FALSE	100000-1999999	0-9	80-89	400-499	10000-19999	2015-2017	FALSE
FALSE	YES	NO	FALSE	TRUE	FALSE	3000-3999	0-9	0-9	0-9	20-29	2009-2011	TRUE
FALSE	NO	NO	FALSE	TRUE	FALSE	30000-39999	900-999	30-39	1000-1999	1000-1999	2012-2014	FALSE
TRUE	NO	NO	FALSE	TRUE	FALSE	100000-1999999	0-9	80-89	400-499	10000-19999	2015-2017	FALSE
FALSE	YES	NO	FALSE	TRUE	TRUE	200-299	100-199	0-9	500-599	20-29	2015-2017	FALSE
FALSE	YES	NO	TRUE	TRUE	TRUE	30000-39999	10000-19999	0-9	500-599	1000-1999	2012-2014	FALSE
FALSE	YES	YES	TRUE	TRUE	TRUE	20000-29999	2000-2999	80-89	3000-3999	2000-2999	2012-2014	FALSE
FALSE	YES	YES	FALSE	TRUE	FALSE	2000-2999	0-9	0-9	20-29	10-19	2009-2011	TRUE
FALSE	YES	NO	FALSE	TRUE	FALSE	2000-2999	0-9	0-9	10-19	10-19	2009-2011	TRUE
FALSE	YES	NO	TRUE	FALSE	TRUE	5000-5999	6000-6999	0-9	400-499	900-999	2012-2014	FALSE
FALSE	YES	YES	TRUE	FALSE	FALSE	1000-1999	30-39	0-9	0-9	20-29	2012-2014	TRUE
FALSE	YES	YES	FALSE	TRUE	FALSE	20000-29999	0-9	0-9	2000-2999	1000-1999	2015-2017	TRUE
FALSE	YES	YES	FALSE	TRUE	FALSE	1000-1999	0-9	0-9	20-29	10-19	2009-2011	TRUE
FALSE	YES	NO	TRUE	TRUE	FALSE	1000-1999	0-9	0-9	2000-2999	1000-1999	2015-2017	TRUE
FALSE	YES	YES	FALSE	TRUE	TRUE	0-99	20-29	0-9	80-89	0-9	2012-2014	FALSE
FALSE	YES	NO	FALSE	FALSE	FALSE	100000-1999999	0-9	0-9	200-299	1000-1999	2009-2011	FALSE
FALSE	YES	NO	TRUE	FALSE	TRUE	10000-19999	20000-29999	0-9	300-399	400-499	2015-2017	FALSE
TRUE	YES	YES	FALSE	TRUE	FALSE	4000-4999	0-9	0-9	40-49	10-19	2015-2017	FALSE
FALSE	YES	NO	FALSE	TRUE	FALSE	2000-2999	0-9	0-9	0-9	20-29	2012-2014	FALSE
FALSE	YES	NO	FALSE	TRUE	TRUE	2000-2999	0-9	0-9	4000-4999	800-899	2015-2017	TRUE
TRUE	YES	NO	FALSE	TRUE	FALSE	1000-1999	0-9	0-9	20-29	20-29	2015-2017	FALSE
FALSE	YES	YES	FALSE	TRUE	TRUE	200-299	100-199	0-9	700-799	100-199	2015-2017	TRUE
TRUE	YES	NO	FALSE	TRUE	FALSE	1000-1999	0-9	0-9	10-19	0-9	2015-2017	FALSE
TRUE	YES	NO	FALSE	TRUE	FALSE	3000-3999	0-9	0-9	0-9	10-19	2012-2014	FALSE
TRUE	YES	NO	FALSE	TRUE	FALSE	2000-2999	0-9	0-9	0-9	10-19	2009-2011	FALSE
TRUE	YES	NO	FALSE	TRUE	FALSE	2000-2999	0-9	0-9	0-9	10-19	2009-2011	FALSE
FALSE	YES	NO	FALSE	TRUE	TRUE	3000-3999	3000-3999	0-9	1000-1999	200-299	2015-2017	TRUE
TRUE	YES	YES	TRUE	FALSE	FALSE	2000-2999	0-9	0-9	0-9	20-29	2012-2014	FALSE
FALSE	YES	YES	FALSE	TRUE	TRUE	7000-7999	10000-19999	10-19	200-299	500-599	2015-2017	TRUE
TRUE	YES	NO	FALSE	TRUE	FALSE	1000-1999	0-9	0-9	30-39	10-19	2012-2014	FALSE
TRUE	YES	YES	FALSE	TRUE	FALSE	4000-4999	0-9	0-9	2000-2999	300-399	2009-2011	FALSE
TRUE	YES	NO	FALSE	TRUE	FALSE	2000-2999	0-9	0-9	0-9	10-19	2009-2011	FALSE
FALSE	YES	NO	FALSE	TRUE	TRUE	90000-99999	70000-79999	100-199	400-499	1000-1999	2009-2011	TRUE
TRUE	YES	NO	FALSE	TRUE	FALSE	3000-3999	0-9	0-9	0-9	10-19	2009-2011	FALSE
TRUE	YES	NO	FALSE	TRUE	FALSE	1000-1999	0-9	0-9	30-39	10-19	2012-2014	FALSE
TRUE	YES	NO	FALSE	TRUE	FALSE	4000-4999	50-59	0-9	1000-1999	300-399	2009-2011	FALSE
TRUE	YES	NO	FALSE	TRUE	FALSE	1000-1999	0-9	0-9	0-9	10-19	2012-2014	FALSE
TRUE	YES	NO	FALSE	TRUE	FALSE	2000-2999	0-9	0-9	0-9	10-19	2012-2014	FALSE
FALSE	YES	NO	FALSE	TRUE	TRUE	2000-2999	0-9	0-9	4000-4999	800-899	2015-2017	TRUE
TRUE	YES	NO	FALSE	FALSE	FALSE	1000-1999	0-9	0-9	0-9	10-19	2012-2014	FALSE
FALSE	YES	NO	FALSE	TRUE	TRUE	3000-3999	3000-3999	0-9	1000-1999	200-299	2015-2017	TRUE
TRUE	YES	YES	FALSE	TRUE	FALSE	1000-1999	0-9	0-9	10-19	10-19	2009-2011	FALSE
FALSE	YES	YES	TRUE	FALSE	TRUE	10000-19999	2000-2999	10-19	400-499	800-899	2009-2011	FALSE
TRUE	YES	YES	TRUE	FALSE	FALSE	20000-29999	70-79	0-9	400-499	500-599	2009-2011	FALSE
FALSE	YES	YES	TRUE	FALSE	TRUE	20000-29999	10000-19999	0-9	200-299	400-499	2009-2011	FALSE
TRUE	YES	NO	FALSE	TRUE	FALSE	1000-1999	0-9	0-9	0-9	10-19	2012-2014	FALSE
TRUE	YES	YES	FALSE	TRUE	FALSE	2000-2999	0-9	0-9	0-9	10-19	2009-2011	FALSE
FALSE	YES	YES	FALSE	TRUE	TRUE	8000-8999	20000-29999	10-19	1000-1999	200-299	2015-2017	TRUE
TRUE	YES	NO	FALSE	TRUE	FALSE	2000-2999	0-9	0-9	0-9	10-19	2009-2011	FALSE
TRUE	YES	NO	FALSE	TRUE	FALSE	1000-1999	0-9	0-9	0-9	10-19	2012-2014	FALSE
TRUE	YES	NO	FALSE	TRUE	FALSE	2000-2999	0-9	0-9	40-49	50-59	2012-2014	FALSE
FALSE	YES	NO	FALSE	TRUE	TRUE	1000-1999	9000-9999	0-9	500-599	100-199	2015-2017	TRUE
TRUE	YES	NO	FALSE	TRUE	FALSE	1000-1999	0-9	0-9	10-19	20-29	2009-2011	FALSE
TRUE	YES	NO	FALSE	TRUE	FALSE	2000-2999	0-9	0-9	0-9	20-29	2009-2011	FALSE
TRUE	YES	NO	FALSE	TRUE	FALSE	2000-2999	0-9	0-9	0-9	10-19	2012-2014	FALSE
TRUE	YES	NO	FALSE	TRUE	FALSE	3000-3999	0-9	0-9	0-9	20-29	2012-2014	FALSE
TRUE	YES	NO	FALSE	TRUE	FALSE	1000-1999	0-9	0-9	20-29	20-29	2015-2017	FALSE
FALSE	YES	NO	TRUE	FALSE	FALSE	10000-19999	20000-29999	100-199	700-799	20000-29999	2009-2011	FALSE
TRUE	YES	YES	FALSE	FALSE	FALSE	2000-2999	0-9	0-9	20-29	60-69	2009-2011	FALSE
TRUE	YES	NO	FALSE	TRUE	FALSE	1000-1999	0-9	0-9	0-9	20-29	2009-2011	FALSE
TRUE	YES	NO	FALSE	TRUE	FALSE	1000-1999	0-9	0-9	0-9	0-9	2012-2014	FALSE
TRUE	YES	YES	FALSE	FALSE	FALSE	1000-1999	70-79	0-9	500-599	100-199	2009-2011	FALSE
TRUE	YES	NO	FALSE	TRUE	FALSE	1000-1999	0-9	0-9	0-9	0-9	2009-2011	FALSE
TRUE	YES	YES	FALSE	TRUE	FALSE	1000-1999	0-9	0-9	50-59	10-19	2015-2017	FALSE
TRUE	YES	NO	FALSE	TRUE	FALSE	2000-2999	0-9	0-9	10-19	20-29	2012-2014	FALSE
FALSE	YES	NO	FALSE	TRUE	FALSE	2000-2999	6000-6999	600-699	100-199	100000-1999999	2015-2017	TRUE
TRUE	NO	NO	FALSE	TRUE	FALSE	9000-9999	0-9	0-9	0-9	0-9	2015-2017	FALSE
TRUE	YES	YES	FALSE	FALSE	FALSE	2000-2999	0-9	0-9	500-599	10-19	2009-2011	FALSE
TRUE	YES	NO	FALSE	TRUE	FALSE	2000-2999	0-9	0-9	10-19	10-19	2009-2011	FALSE
TRUE	YES	NO	FALSE	TRUE	FALSE	2000-2999	0-9	0-9	30-39	30-39	2012-2014	FALSE
FALSE	YES	NO	TRUE	TRUE	FALSE	30000-39999	10000-19999	0-9	500-599	1000-1999	2012-2014	FALSE
TRUE	YES	YES	FALSE	FALSE	FALSE	4000-4999	0-9	0-9	100-199	50-59	2012-2014	FALSE
TRUE	NO	NO	FALSE	TRUE	FALSE	9000-9999	0-9	0-9	0-9	0-9	2015-2017	FALSE
FALSE	YES	NO	FALSE	TRUE	FALSE	1000-1999	0-9	0-9	20-29	10-19	2012-2014	TRUE
FALSE	YES	NO	FALSE	TRUE	FALSE	2000-2999	0-9	0-9	100-199	0-9	2009-2011	TRUE
FALSE	YES	YES	FALSE	TRUE	FALSE	2000-2999	0-9	0-9	0-9	20-29	2012-2014	TRUE
FALSE	YES	NO	FALSE	TRUE	FALSE	3000-3999	0-9	0-9	0-9	40-49	2009-2011	TRUE
FALSE	YES	NO	FALSE	TRUE	FALSE	1000-1999	0-9	0-9	0-9	10-19	2012-2014	TRUE
FALSE	YES	YES	FALSE	TRUE	TRUE	3000-3999	4000-4999	0-9	200-299	20-29	2015-2017	TRUE
FALSE	NO	NO	FALSE	TRUE	FALSE	9000-9999	0-9	0-9	0-9	0-9	2015-2017	TRUE
FALSE	YES	NO	FALSE	TRUE	TRUE	2000-2999	10000-19999	0-9	1000-1999	100-199	2015-2017	TRUE
FALSE	YES	YES	FALSE	FALSE	FALSE	20000-29999	6000-6999	0-9	600-699	20-29	2009-2011	FALSE
FALSE	YES	NO	TRUE	FALSE	FALSE	30000-39999	10000-19999	0-9	100-199	200-299	2012-2014	TRUE
FALSE	YES	YES	FALSE	FALSE	TRUE	3000-3999	200-299	0-9	100-199	70-79	2009-2011	TRUE
FALSE	YES	NO	TRUE	FALSE	FALSE	10000-19999	500-599	0-9	300-399	100-199	2009-2011	TRUE
TRUE	YES	NO	FALSE	TRUE	TRUE	600-699	7000-7999	0-9	4000-4999	500-599	2012-2014	FALSE
FALSE	YES	YES	TRUE	TRUE	FALSE	5000-5999	200-299	0-9	50-59	100-199	2009-2011	TRUE
FALSE	YES	YES	TRUE	FALSE	FALSE	2000-2999	0-9	0-9	100-199	80-89	2009-2011	TRUE
FALSE	YES	NO	FALSE	TRUE	FALSE	1000-1999	0-9	0-9	10-19	10-19	2012-2014	TRUE
FALSE	YES	YES	FALSE	TRUE	FALSE	4000-4999	0-9	0-9	4000-4999	400-499	2015-2017	TRUE
FALSE	YES	NO	FALSE	TRUE	FALSE	1000-1999	0-9	0-9	0-9	20-29	2012-2014	TRUE
FALSE	YES	NO	FALSE	TRUE	FALSE	1000-1999	0-9	0-9	0-9	10-19	2009-2011	TRUE
FALSE	NO	NO	FALSE	TRUE	FALSE	9000-9999	0-9	0-9	0-9	0-9	2015-2017	TRUE
TRUE	YES	NO	FALSE	TRUE	TRUE	3000-3999	3000-3999	0-9	1000-1999	200-299	2015-2017	FALSE
FALSE	YES	NO	FALSE	FALSE	FALSE	1000-1999	20-29	0-9	200-299	100-199	2009-2011	TRUE
FALSE	YES	NO	FALSE	TRUE	FALSE	2000-2999	0-9	0-9	0-9	10-19	2009-2011	TRUE
FALSE	YES	YES	FALSE	TRUE	FALSE	1000-1999	0-9	0-9	0-9	10-19	2015-2017	TRUE
FALSE	YES	NO	FALSE	TRUE	FALSE	2000-2999	0-9	0-9	0-9	0-9	2009-2011	TRUE
TRUE	YES	NO	FALSE	TRUE	TRUE	90000-99999	70000-79999	100-199	400-499	1000-1999	2009-2011	FALSE
FALSE	YES	NO	FALSE	TRUE	FALSE	2000-2999	0-9	0-9	0-9	10-19	2009-2011	TRUE
FALSE	YES	NO	FALSE	TRUE	FALSE	2000-2999	0-9	0-9	0-9	20-29	2009-2011	TRUE
FALSE	NO	NO	FALSE	TRUE	FALSE	9000-9999	0-9	0-9	20-29	0-9	2015-2017	TRUE
FALSE	YES	YES	FALSE	TRUE	FALSE	1000-1999	0-9	0-9	30-39	30-39	2012-2014	TRUE
FALSE	YES	YES	FALSE	FALSE	FALSE	6000-6999	20000-29999	0-9	700-799	100-199	2009-2011	FALSE
FALSE	YES	NO	FALSE	TRUE	FALSE	3000-3999	0-9	0-9	10-19	30-39	2012-2014	TRUE
FALSE	YES	YES	FALSE	FALSE	TRUE	20000-29999	20000-29999	10-19	200-299	300-399	2015-2017	FALSE
FALSE	NO	NO	FALSE	TRUE	FALSE	9000-9999	0-9	0-9	0-9	0-9	2015-2017	TRUE
FALSE	YES	NO	FALSE	FALSE	FALSE	1000-1999	10-19	0-9	0-9	10-19	2012-2014	TRUE
FALSE	YES	NO	FALSE	TRUE	FALSE	1000-1999	0-9	0-9	0-9	10-19	2009-2011	TRUE
FALSE	YES	YES	TRUE	FALSE	FALSE	1000-1999	3000-3999	0-9	100-199	100-199	2009-2011	FALSE
FALSE	NO	NO	FALSE	TRUE	FALSE	9000-9999	0-9	0-9	20-29	0-9	2015-2017	TRUE
FALSE	YES	NO	FALSE	TRUE	FALSE	4000-4999	0-9	0-9	0-9	30-39	2012-2014	TRUE
FALSE	YES	NO	FALSE	TRUE	FALSE	2000-2999	0-9	0-9	0-9	10-19	2009-2011	TRUE
TRUE	YES	YES	TRUE	TRUE	TRUE	10000-19999	9000-9999	0-9	200-299	200-299	2012-2014	FALSE
FALSE	YES	YES	FALSE	TRUE	FALSE	2000-2999	0-9	0-9	0-9	10-19	2009-2011	TRUE
FALSE	NO	NO	FALSE	TRUE	FALSE	9000-9999	0-9	0-9	0-9	0-9	2015-2017	TRUE
FALSE	YES	NO	FALSE	TRUE	FALSE	4000-4999	0-9	0-9	0-9	30-39	2009-2011	TRUE
FALSE	YES	NO	FALSE	TRUE	FALSE	2000-2999	0-9	0-9	10-19	0-9	2009-2011	TRUE
FALSE	YES	NO	FALSE	TRUE	FALSE	2000-2999	0-9	0-9	0-9	40-49	2009-2011	TRUE
TRUE	NO	NO	FALSE	TRUE	FALSE	10000-19999	20000-29999	50-59	200-299	6000-6999	2015-2017	FALSE
FALSE	YES	NO	FALSE	TRUE	FALSE	3000-3999	0-9	0-9	70-79	10-19	2012-2014	TRUE
FALSE	YES	NO	FALSE	TRUE	FALSE	2000-2999	0-9	0-9	0-9	10-19	2009-2011	TRUE
TRUE	NO	NO	FALSE	TRUE	FALSE	100000-1999999	0-9	80-89	400-499	10000-19999	2015-2017	FALSE
FALSE	YES	NO	FALSE	TRUE	FALSE	1000-1999	0-9	0-9	10-19	20-29	2012-2014	TRUE
FALSE	YES	NO	FALSE	TRUE	FALSE	1000-1999	0-9	0-9	0-9	40-49	2015-2017	TRUE
FALSE	YES	NO	FALSE	FALSE	FALSE	3000-3999	20-29	0-9	20-29	40-49	2012-2014	TRUE
TRUE	NO	NO	FALSE	TRUE	FALSE	100000-1999999	0-9	80-89	400-499	10000-19999	2015-2017	FALSE
FALSE	YES	NO	FALSE	TRUE	FALSE	2000-2999	0-9	0-9	0-9	10-19	2009-2011	TRUE
TRUE	NO	NO	FALSE	TRUE	FALSE	10000-19999	0-9	20-29	90-99	100-199	2015-2017	FALSE
FALSE	YES	NO	FALSE	TRUE	FALSE	2000-2999	0-9	0-9	0-9	20-29	2009-2011	TRUE
FALSE	YES	YES	TRUE	FALSE	TRUE	30000-39999	10000-19999	0-9	400-499	400-499	2009-2011	FALSE
FALSE	YES	YES	FALSE	TRUE	FALSE	1000-1999	0-9	0-9	0-9	10-19	2009-2011	TRUE
FALSE	YES	NO	FALSE	TRUE	FALSE	3000-3999	0-9	0-9	0-9	20-29	2012-2014	TRUE
FALSE	YES	YES	TRUE	TRUE	FALSE	1000-1999	0-9	0-9	40-49	10-19	2009-2011	TRUE
FALSE	YES	NO	FALSE	TRUE	FALSE	2000-2999	0-9	0-9	10-19	10-19	2012-2014	TRUE
FALSE	YES	YES	FALSE	TRUE	FALSE	2000-2999	0-9	0-9	0-9	20-29	2012-2014	TRUE
TRUE	NO	NO	FALSE	TRUE	FALSE	100000-1999999	0-9	100-199	300-399	30000-39999	2015-2017	FALSE
FALSE	YES	NO	FALSE	TRUE	FALSE	1000-1999	0-9	0-9	0-9	0-9	2012-2014	TRUE
FALSE	YES	YES	TRUE	FALSE	TRUE	100000-1999999	3000-3999	30-39	1000-1999	1000-1999	2009-2011	FALSE
FALSE	YES	YES	FALSE	FALSE	FALSE	2000-2999	0-9	0-9	50-59	50-59	2009-2011	TRUE
FALSE	YES	YES	TRUE	TRUE	TRUE	1000-1999	40-49	0-9	80-89	70-79	2009-2011	FALSE
TRUE	NO	NO	FALSE	TRUE	FALSE	100000-1999999	0-9	100-199	300-399	30000-39999	2015-2017	FALSE
TRUE	NO	NO	FALSE	TRUE	FALSE	100000-1999999	10-19	40-49	800-899	7000-7999	2015-2017	FALSE
TRUE	NO	NO	FALSE	FALSE	FALSE	70000-79999	1000-1999	900-999	2000-2999	100000-1999999	2012-2014	FALSE
TRUE	NO	NO	FALSE	TRUE	FALSE	100000-1999999	10-19	40-49	800-899	7000-7999	2015-2017	FALSE
FALSE	YES	NO	FALSE	TRUE	FALSE	2000-2999	0-9	0-9	100-199	20-29	2009-2011	TRUE
FALSE	YES	NO	FALSE	TRUE	FALSE	3000-3999	0-9	0-9	10-19	30-39	2012-2014	TRUE
TRUE	NO	NO	FALSE	TRUE	FALSE	100000-1999999	10-19	40-49	800-899	7000-7999	2015-2017	FALSE
TRUE	YES	NO	FALSE	TRUE	TRUE	4000-4999	3000-3999	0-9	800-899	100-199	2015-2017	FALSE
FALSE	YES	NO	FALSE	TRUE	FALSE	1000-1999	0-9	0-9	30-39	30-39	2012-2014	TRUE
FALSE	YES	NO	FALSE	TRUE	FALSE	1000-1999	0-9	0-9	0-9	10-19	2012-2014	TRUE
FALSE	YES	NO	FALSE	TRUE	FALSE	1000-1999	0-9	0-9	10-19	0-9	2012-2014	TRUE
TRUE	YES	YES	FALSE	TRUE	TRUE	1000-1999	200-299	0-9	3000-3999	200-299	2015-2017	FALSE
FALSE	YES	NO	FALSE	TRUE	FALSE	2000-2999	0-9	0-9	0-9	10-19	2012-2014	TRUE
FALSE	YES	NO	FALSE	FALSE	FALSE	2000-2999	0-9	0-9	0-9	10-19	2012-2014	TRUE
TRUE	NO	NO	FALSE	FALSE	FALSE	90000-99999	0-9	400-499	900-999	70000-79999	2012-2014	FALSE
FALSE	YES	YES	FALSE	FALSE	FALSE	3000-3999	0-9	0-9	100-199	400-499	2009-2011	TRUE
FALSE	YES	NO	FALSE	TRUE	FALSE	2000-2999	0-9	0-9	0-9	20-29	2009-2011	TRUE
FALSE	YES	NO	FALSE	FALSE	FALSE	3000-3999	20-29	0-9	200-299	100-199	2012-2014	TRUE
FALSE	YES	NO	FALSE	TRUE	FALSE	1000-1999	0-9	0-9	0-9	0-9	2009-2011	TRUE
FALSE	YES	NO	TRUE	TRUE	FALSE	2000-2999	0-9	0-9	0-9	0-9	2012-2014	TRUE
FALSE	YES	YES	FALSE	TRUE	FALSE	300-399	0-9	0-9	0-9	0-9	2015-2017	TRUE
FALSE	YES	YES	FALSE	FALSE	TRUE	0-99	100-199	0-9	50-59	10-19	2012-2014	FALSE
FALSE	YES	NO	FALSE	TRUE	FALSE	1000-1999	0-9	0-9	10-19	10-19	2015-2017	TRUE
FALSE	YES	NO	FALSE	TRUE	FALSE	1000-1999	0-9	0-9	0-9	20-29	2009-2011	TRUE
FALSE	YES	NO	FALSE	TRUE	FALSE	2000-2999	0-9	0-9	100-199	60-69	2012-2014	TRUE
FALSE	YES	YES	TRUE	FALSE	FALSE	2000-2999	0-9	0-9	10-19	20-29	2009-2011	TRUE
FALSE	YES	NO	FALSE	TRUE	FALSE	2000-2999	0-9	0-9	0-9	20-29	2009-2011	TRUE
TRUE	YES	NO	FALSE	TRUE	TRUE	2000-2999	0-9	0-9	4000-4999	800-899	2015-2017	FALSE
FALSE	YES	YES	FALSE	FALSE	FALSE	10000-19999	100-199	0-9	800-899	600-699	2012-2014	TRUE
FALSE	YES	NO	FALSE	TRUE	FALSE	2000-2999	0-9	0-9	0-9	20-29	2009-2011	TRUE
FALSE	YES	NO	FALSE	TRUE	FALSE	1000-1999	0-9	0-9	20-29	20-29	2012-2014	TRUE
TRUE	YES	NO	FALSE	FALSE	TRUE	2000-2999	2000-2999	0-9	100-199	600-699	2015-2017	FALSE
FALSE	YES	NO	FALSE	TRUE	FALSE	2000-2999	0-9	0-9	0-9	20-29	2009-2011	TRUE
TRUE	YES	NO	FALSE	TRUE	TRUE	0-99	0-9	0-9	90-99	40-49	2015-2017	FALSE
FALSE	YES	NO	FALSE	TRUE	FALSE	1000-1999	0-9	0-9	80-89	0-9	2015-2017	TRUE
FALSE	YES	NO	FALSE	TRUE	FALSE	1000-1999	0-9	0-9	0-9	0-9	2009-2011	TRUE
FALSE	YES	NO	FALSE	TRUE	FALSE	3000-3999	10-19	0-9	10-19	30-39	2009-2011	TRUE
FALSE	YES	YES	FALSE	TRUE	FALSE	2000-2999	50-59	0-9	90-99	70-79	2015-2017	TRUE
FALSE	YES	YES	TRUE	FALSE	FALSE	1000-1999	0-9	0-9	20-29	20-29	2012-2014	TRUE
FALSE	YES	YES	FALSE	TRUE	FALSE	2000-2999	0-9	0-9	20-29	20-29	2012-2014	TRUE
FALSE	YES	NO	FALSE	TRUE	FALSE	3000-3999	0-9	0-9	0-9	10-19	2012-2014	TRUE
FALSE	YES	NO	FALSE	TRUE	FALSE	2000-2999	0-9	0-9	20-29	10-19	2012-2014	TRUE
FALSE	YES	NO	FALSE	FALSE	FALSE	1000-1999	60-69	0-9	100-199	30-39	2012-2014	TRUE
FALSE	NO	YES	FALSE	FALSE	FALSE	4000-4999	0-9	100-199	10000-99999	10000-19999	2012-2014	TRUE
FALSE	YES	NO	FALSE	TRUE	FALSE	3000-3999	0-9	0-9	60-69	20-29	2015-2017	TRUE
TRUE	YES	YES	FALSE	TRUE	TRUE	800-899	0-9	0-9	400-499	20-29	2015-2017	FALSE
FALSE	YES	NO	FALSE	TRUE	FALSE	2000-2999	0-9	0-9	0-9	10-19	2012-2014	TRUE
FALSE	YES	NO	FALSE	TRUE	FALSE	3000-3999	3000-3999	0-9	500-599	80-89	2009-2011	FALSE
FALSE	YES	NO	FALSE	TRUE	FALSE	2000-2999	0-9	0-9	0-9	20-29	2012-2014	TRUE
FALSE	YES	YES	FALSE	FALSE	FALSE	1000-1999	10-19	0-9	20-29	30-39	2012-2014	TRUE
FALSE	YES	NO	FALSE	TRUE	FALSE	2000-2999	0-9	0-9	0-9	20-29	2009-2011	TRUE
FALSE	YES	NO	FALSE	TRUE	FALSE	1000-1999	0-9	0-9	0-9	0-9	2012-2014	TRUE
FALSE	YES	NO	FALSE	TRUE	FALSE	1000-1999	0-9	0-9	0-9	10-19	2012-2014	TRUE
FALSE	YES	YES	FALSE	FALSE	FALSE	1000-1999	0-9	0-9	0-9	10-19	2009-2011	TRUE
FALSE	YES	NO	TRUE	FALSE	TRUE	30000-39999	20000-29999	0-9	700-799	1000-1999	2012-2014	FALSE
FALSE	YES	NO	FALSE	TRUE	FALSE	1000-1999	0-9	0-9	0-9	10-19	2012-2014	TRUE
FALSE	YES	NO	TRUE	FALSE	FALSE	2000-2999	0-9	0-9	0-9	10-19	2009-2011	TRUE
FALSE	YES	NO	FALSE	TRUE	FALSE	2000-2999	0-9	0-9	10-19	10-19	2012-2014	TRUE
FALSE	YES	NO	FALSE	TRUE	FALSE	1000-1999	0-9	0-9	0-9	10-19	2009-2011	TRUE
FALSE	YES	NO	FALSE	TRUE	FALSE	1000-1999	0-9	0-9	0-9	0-9	2015-2017	TRUE
FALSE	YES	YES	FALSE	TRUE	FALSE	900-999	2000-2999	0-9	300-399	100-199	2015-2017	FALSE
TRUE	NO	NO	FALSE	FALSE	FALSE	8000-8999	1000-1999	10-19	1000-1999	6000-6999	2012-2014	FALSE
FALSE	YES	NO	FALSE	FALSE	FALSE	2000-2999	0-9	0-9	20-29	20-29	2009-2011	TRUE
FALSE	YES	NO	FALSE	TRUE	FALSE	2000-2999	60-69	0-9	100-199	60-69	2009-2011	TRUE
FALSE	YES	NO	FALSE	TRUE	FALSE	1000-1999	0-9	0-9	10-19	20-29	2009-2011	TRUE
FALSE	YES	NO	FALSE	FALSE	FALSE	2000-2999	0-9	0-9	0-9	10-19	2009-2011	TRUE
FALSE	YES	NO	FALSE	TRUE	FALSE	1000-1999	0-9	0-9	0-9	20-29	2012-2014	TRUE
FALSE	YES	NO	TRUE	TRUE	FALSE	2000-2999	3000-3999	0-9	10-19	10-19	2012-2014	TRUE
FALSE	YES	NO	FALSE	TRUE	FALSE	2000-2999	0-9	0-9	0-9	10-19	2012-2014	TRUE
FALSE	YES	NO	FALSE	TRUE	FALSE	1000-1999	0-9	0-9	20-29	20-29	2009-2011	TRUE
TRUE	NO	NO	FALSE	TRUE	FALSE	100000-1999999	10-19	100-199	700-799	20000-29999	2015-2017	FALSE
TRUE	YES	YES	FALSE	TRUE	TRUE	30000-39999	10000-19999	0-9	5000-5999	400-499	2015-2017	FALSE
FALSE	YES	YES	TRUE	FALSE	TRUE	20000-29999	10000-19999	10-19	400-499	200-299	2012-2014	FALSE
FALSE	YES	YES	FALSE	TRUE	FALSE	2000-2999	0-9	0-9	0-9	10-19	2009-2011	TRUE
FALSE	YES	YES	FALSE	FALSE	FALSE	1000-1999	0-9	0-9	0-9	10-19	2009-2011	TRUE
FALSE	YES	NO	FALSE	TRUE	FALSE	3000-3999	0-9	0-9	20-29	30-39	2009-2011	TRUE
FALSE	YES	NO	TRUE	FALSE	FALSE	8000-8999	500-599	10-19	1000-1999	400-499	2009-2011	TRUE
TRUE	YES	YES	FALSE	FALSE	TRUE	200-299	300-399	0-9	200-299	40-49	2015-2017	FALSE
FALSE	YES	NO	FALSE	TRUE	FALSE	2000-2999	0-9	0-9	20-29	20-29	2012-2014	TRUE
FALSE	YES	NO	FALSE	TRUE	FALSE	1000-1999	0-9	0-9	40-49	20-29	2012-2014	TRUE
FALSE	YES	NO	FALSE	TRUE	FALSE	1000-1999	0-9	0-9	0-9	0-9	2009-2011	TRUE
FALSE	YES	NO	FALSE	TRUE	FALSE	1000-1999	0-9	0-9	0-9	0-9	2012-2014	TRUE
TRUE	YES	NO	FALSE	TRUE	TRUE	700-799	2000-2999	0-9	800-899	200-299	2015-2017	FALSE
FALSE	YES	YES	FALSE	TRUE	TRUE	2000-2999	1000-1999	0-9	100-199	100-199	2015-2017	FALSE
FALSE	YES	NO	FALSE	TRUE	FALSE	3000-3999	0-9	0-9	50-59	40-49	2012-2014	TRUE
TRUE	NO	NO	FALSE	TRUE	FALSE	100000-1999999	0-9	100-199	300-399	30000-39999	2015-2017	FALSE
FALSE	YES	NO	FALSE	FALSE	FALSE	1000-1999	40-49	0-9	80-89	30-39	2012-2014	TRUE
TRUE	YES	NO	FALSE	TRUE	TRUE	2000-2999	50-59	10-19	1000-1999	900-999	2015-2017	FALSE
FALSE	YES	NO	FALSE	TRUE	FALSE	1000-1999	0-9	0-9	10-19	10-19	2012-2014	TRUE
FALSE	YES	NO	FALSE	TRUE	FALSE	2000-2999	0-9	0-9	0-9	30-39	2012-2014	TRUE
TRUE	NO	NO	FALSE	TRUE	FALSE	100000-1999999	0-9	100-199	300-399	30000-39999	2015-2017	FALSE
FALSE	YES	YES	TRUE	TRUE	FALSE	1000-1999	0-9	0-9	10-19	20-29	2009-2011	TRUE
TRUE	YES	YES	FALSE	TRUE	TRUE	100-199	30-39	0-9	300-399	90-99	2015-2017	FALSE
FALSE	YES	YES	TRUE	FALSE	FALSE	3000-3999	0-9	0-9	100-199	60-69	2009-2011	TRUE
FALSE	YES	NO	FALSE	TRUE	FALSE	2000-2999	0-9	0-9	0-9	10-19	2012-2014	TRUE
FALSE	YES	NO	FALSE	TRUE	FALSE	1000-1999	0-9	0-9	0-9	10-19	2012-2014	TRUE
FALSE	YES	NO	FALSE	FALSE	FALSE	1000-1999	0-9	0-9	0-9	10-19	2009-2011	TRUE
TRUE	NO	NO	FALSE	TRUE	FALSE	4000-4999	0-9	0-9	0-9	1000-1999	2015-2017	FALSE
TRUE	YES	NO	FALSE	TRUE	TRUE	900-999	300-399	0-9	90-99	50-59	2015-2017	FALSE
FALSE	YES	NO	FALSE	TRUE	FALSE	1000-1999	0-9	0-9	0-9	10-19	2009-2011	TRUE
FALSE	YES	YES	TRUE	TRUE	FALSE	3000-3999	0-9	0-9	0-9	30-39	2009-2011	TRUE
FALSE	YES	NO	FALSE	TRUE	FALSE	2000-2999	0-9	0-9	0-9	30-39	2009-2011	TRUE
FALSE	YES	NO	FALSE	TRUE	FALSE	1000-1999	0-9	0-9	80-89	10-19	2012-2014	TRUE
TRUE	NO	NO	FALSE	FALSE	FALSE	7000-7999	0-9	0-9	0-9	2000-2999	2015-2017	FALSE
FALSE	YES	YES	FALSE	TRUE	FALSE	2000-2999	0-9	0-9	10-19	20-29	2012-2014	TRUE
FALSE	YES	NO	FALSE	TRUE	FALSE	2000-2999	0-9	0-9	10-19	10-19	2012-2014	FALSE
FALSE	YES	YES	TRUE	FALSE	TRUE	100000-1999999	500-599	10-19	3000-3999	4000-4999	2009-2011	FALSE
FALSE	YES	NO	FALSE	TRUE	FALSE	4000-4999	0-9	0-9	0-9	30-39	2012-2014	TRUE
TRUE	YES	NO	FALSE	TRUE	TRUE	2000-2999	0-9	0-9	4000-4999	800-899	2015-2017	FALSE
FALSE	YES	YES	TRUE	TRUE	FALSE	20000-29999	1000-1999	10-19	2000-2999	900-999	2012-2014	FALSE
FALSE	YES	NO	FALSE	TRUE	FALSE	1000-1999	0-9	0-9	10-19	0-9	2015-2017	TRUE
FALSE	YES	NO	FALSE	TRUE	FALSE	4000-4999	0-9	0-9	0-9	30-39	2009-2011	TRUE
FALSE	YES	YES	TRUE	FALSE	FALSE	10000-19999	10000-19999	0-9	300-399	200-299	2009-2011	TRUE
FALSE	YES	NO	FALSE	TRUE	FALSE	1000-1999	0-9	0-9	10-19	10-19	2009-2011	TRUE
FALSE	NO	YES	FALSE	TRUE	FALSE	10000-19999	10000-19999	20-29	200-299	300-399	2009-2011	FALSE
FALSE	YES	NO	FALSE	TRUE	FALSE	2000-2999	0-9	0-9	0-9	0-9	2009-2011	TRUE
FALSE	YES	NO	FALSE	TRUE	FALSE	2000-2999	0-9	0-9	20-29	20-29	2012-2014	TRUE
TRUE	NO	NO	FALSE	TRUE	FALSE	6000-6999	0-9	0-9	0-9	600-699	2015-2017	FALSE
FALSE	YES	NO	FALSE	TRUE	FALSE	3000-3999	0-9	0-9	0-9	20-29	2009-2011	TRUE
FALSE	YES	NO	FALSE	TRUE	FALSE	2000-2999	0-9	0-9	0-9	10-19	2009-2011	TRUE
FALSE	YES	YES	TRUE	TRUE	FALSE	1000-1999	0-9	0-9	60-69	30-39	2012-2014	TRUE
TRUE	YES	NO	FALSE	TRUE	TRUE	700-799	1000-1999	0-9	500-599	800-899	2015-2017	FALSE
FALSE	YES	YES	TRUE	FALSE	TRUE	20000-29999	20000-29999	700-799	200-299	30000-39999	2006-2008	FALSE
FALSE	YES	NO	FALSE	FALSE	FALSE	9000-9999	20-29	0-9	200-299	100-199	2009-2011	TRUE
FALSE	YES	YES	FALSE	FALSE	FALSE	1000-1999	0-9	0-9	20-29	10-19	2009-2011	TRUE
FALSE	YES	NO	FALSE	TRUE	FALSE	2000-2999	10-19	0-9	20-29	20-29	2012-2014	TRUE
FALSE	YES	NO	FALSE	TRUE	FALSE	2000-2999	0-9	0-9	0-9	0-9	2015-2017	TRUE
FALSE	YES	NO	FALSE	TRUE	FALSE	1000-1999	10-19	0-9	0-9	0-9	2012-2014	TRUE
FALSE	YES	NO	FALSE	TRUE	FALSE	3000-3999	30-39	0-9	40-49	20-29	2012-2014	TRUE
FALSE	YES	NO	FALSE	TRUE	FALSE	2000-2999	30-39	0-9	200-299	200-299	2015-2017	TRUE
FALSE	YES	NO	FALSE	TRUE	FALSE	2000-2999	30-39	0-9	0-9	10-19	2012-2014	TRUE
FALSE	YES	NO	FALSE	TRUE	FALSE	1000-1999	20-29	0-9	30-39	20-29	2012-2014	TRUE
FALSE	YES	NO	FALSE	TRUE	FALSE	3000-3999	40-49	0-9	0-9	20-29	2009-2011	TRUE
FALSE	YES	NO	FALSE	TRUE	FALSE	1000-1999	10-19	0-9	0-9	20-29	2012-2014	TRUE
FALSE	YES	NO	FALSE	TRUE	FALSE	2000-2999	0-9	0-9	0-9	10-19	2009-2011	TRUE
FALSE	YES	NO	FALSE	TRUE	FALSE	2000-2999	0-9	0-9	0-9	10-19	2009-2011	TRUE
FALSE	NO	NO	FALSE	TRUE	FALSE	30000-39999	900-999	30-39	1000-1999	1000-1999	2012-2014	FALSE
FALSE	YES	NO	FALSE	TRUE	FALSE	2000-2999	10-19	0-9	100-199	100-199	2012-2014	TRUE
FALSE	YES	YES	FALSE	FALSE	FALSE	2000-2999	10-19	0-9	100-199	70-79	2012-2014	TRUE
TRUE	NO	NO	FALSE	TRUE	FALSE	100000-1999999	0-9	80-89	400-499	10000-19999	2015-2017	FALSE
FALSE	YES	NO	FALSE	TRUE	FALSE	3000-3999	0-9	0-9	0-9	20-29	2009-2011	TRUE
FALSE	NO	NO	FALSE	TRUE	FALSE	30000-39999	900-999	30-39	1000-1999	1000-1999	2012-2014	FALSE
TRUE	NO	NO	FALSE	TRUE	FALSE	100000-1999999	0-9	80-89	400-499	10000-19999	2015-2017	FALSE
FALSE	YES	NO	FALSE	TRUE	TRUE	200-299	100-199	0-9	500-599	20-29	2015-2017	FALSE
FALSE	YES	NO	TRUE	TRUE	TRUE	30000-39999	10000-19999	0-9	500-599	1000-1999	2012-2014	FALSE
FALSE	YES	YES	TRUE	TRUE	TRUE	20000-29999	2000-2999	80-89	3000-3999	2000-2999	2012-2014	FALSE
FALSE	YES	YES	FALSE	TRUE	FALSE	2000-2999	0-9	0-9	20-29	10-19	2009-2011	TRUE
FALSE	YES	NO	FALSE	TRUE	FALSE	2000-2999	0-9	0-9	10-19	10-19	2009-2011	TRUE
FALSE	YES	NO	TRUE	FALSE	TRUE	5000-5999	6000-6999	0-9	400-499	900-999	2012-2014	FALSE
FALSE	YES	YES	TRUE	FALSE	FALSE	1000-1999	30-39	0-9	0-9	20-29	2012-2014	TRUE
FALSE	YES	YES	FALSE	TRUE	FALSE	20000-29999	0-9	0-9	2000-2999	1000-1999	2015-2017	TRUE
FALSE	YES	YES	FALSE	TRUE	FALSE	1000-1999	0-9	0-9	20-29	10-19	2009-2011	TRUE
FALSE	YES	NO	TRUE	TRUE	FALSE	1000-1999	0-9	0-9	2000-2999	1000-1999	2015-2017	TRUE
FALSE	YES	YES	FALSE	TRUE	TRUE	0-99	20-29	0-9	80-89	0-9	2012-2014	FALSE
FALSE	YES	NO	FALSE	FALSE	FALSE	100000-1999999	0-9	0-9	200-299	1000-1999	2009-2011	FALSE
FALSE	YES	NO	TRUE	FALSE	TRUE	10000-19999	20000-29999	0-9	300-399	400-499	2015-2017	FALSE
TRUE	YES	YES	FALSE	TRUE	FALSE	4000-4999	0-9	0-9	40-49	10-19	2015-2017	FALSE
FALSE	YES	NO	FALSE	TRUE	FALSE	2000-2999	0-9	0-9	0-9	20-29	2012-2014	FALSE
FALSE	YES	NO	FALSE	TRUE	TRUE	2000-2999	0-9	0-9	4000-4999	800-899	2015-2017	TRUE
TRUE	YES	NO	FALSE	TRUE	FALSE	1000-1999	0-9	0-9	20-29	20-29	2015-2017	FALSE
FALSE	YES	YES	FALSE	TRUE	TRUE	200-299	100-199	0-9	700-799	100-199	2015-2017	TRUE
TRUE	YES	NO	FALSE	TRUE	FALSE	1000-1999	0-9	0-9	10-19	0-9	2015-2017	FALSE
TRUE	YES	NO	FALSE	TRUE	FALSE	3000-3999	0-9	0-9	0-9	10-19	2012-2014	FALSE
TRUE	YES	NO	FALSE	TRUE	FALSE	2000-2999	0-9	0-9	0-9	10-19	2009-2011	FALSE
TRUE	YES	NO	FALSE	TRUE	FALSE	2000-2999	0-9	0-9	0-9	10-19	2009-2011	FALSE
FALSE	YES	NO	FALSE	TRUE	TRUE	3000-3999	3000-3999	0-9	1000-1999	200-299	2015-2017	TRUE
TRUE	YES	YES	TRUE	FALSE	FALSE	2000-2999	0-9	0-9	0-9	20-29	2012-2014	FALSE
FALSE	YES	YES	FALSE	TRUE	TRUE	7000-7999	10000-19999	10-19	200-299	500-599	2015-2017	TRUE
TRUE	YES	NO	FALSE	TRUE	FALSE	1000-1999	0-9	0-9	30-39	10-19	2012-2014	FALSE
TRUE	YES	YES	FALSE	TRUE	FALSE	4000-4999	0-9	0-9	2000-2999	300-399	2009-2011	FALSE
TRUE	YES	NO	FALSE	TRUE	FALSE	2000-2999	0-9	0-9	0-9	10-19	2009-2011	FALSE
FALSE	YES	NO	FALSE	TRUE	TRUE	90000-99999	70000-79999	100-199	400-499	1000-1999	2009-2011	TRUE
TRUE	YES	NO	FALSE	TRUE	FALSE	3000-3999	0-9	0-9	0-9	10-19	2009-2011	FALSE
TRUE	YES	NO	FALSE	TRUE	FALSE	1000-1999	0-9	0-9	30-39	10-19	2012-2014	FALSE
TRUE	YES	NO	FALSE	TRUE	FALSE	4000-4999	50-59	0-9	1000-1999	300-399	2009-2011	FALSE
TRUE	YES	NO	FALSE	TRUE	FALSE	1000-1999	0-9	0-9	0-9	10-19	2012-2014	FALSE
TRUE	YES	NO	FALSE	TRUE	FALSE	2000-2999	0-9	0-9	0-9	10-19	2012-2014	FALSE
FALSE	YES	NO	FALSE	TRUE	TRUE	2000-2999	0-9	0-9	4000-4999	800-899	2015-2017	TRUE
TRUE	YES	NO	FALSE	FALSE	FALSE	1000-1999	0-9	0-9	0-9	10-19	2012-2014	FALSE
FALSE	YES	NO	FALSE	TRUE	TRUE	3000-3999	3000-3999	0-9	1000-1999	200-299	2015-2017	TRUE
TRUE	YES	YES	FALSE	TRUE	FALSE	1000-1999	0-9	0-9	10-19	10-19	2009-2011	FALSE
FALSE	YES	YES	TRUE	FALSE	TRUE	10000-19999	2000-2999	10-19	400-499	800-899	2009-2011	FALSE
TRUE	YES	YES	TRUE	FALSE	FALSE	20000-29999	70-79	0-9	400-499	500-599	2009-2011	FALSE
FALSE	YES	YES	TRUE	FALSE	TRUE	20000-29999	10000-19999	0-9	200-299	400-499	2009-2011	FALSE
TRUE	YES	NO	FALSE	TRUE	FALSE	1000-1999	0-9	0-9	0-9	10-19	2012-2014	FALSE
TRUE	YES	YES	FALSE	TRUE	FALSE	2000-2999	0-9	0-9	0-9	10-19	2009-2011	FALSE
FALSE	YES	YES	FALSE	TRUE	TRUE	8000-8999	20000-29999	10-19	1000-1999	200-299	2015-2017	TRUE
TRUE	YES	NO	FALSE	TRUE	FALSE	2000-2999	0-9	0-9	0-9	10-19	2009-2011	FALSE
TRUE	YES	NO	FALSE	TRUE	FALSE	1000-1999	0-9	0-9	0-9	10-19	2012-2014	FALSE
TRUE	YES	NO	FALSE	TRUE	FALSE	2000-2999	0-9	0-9	40-49	50-59	2012-2014	FALSE
FALSE	YES	NO	FALSE	TRUE	TRUE	1000-1999	9000-9999	0-9	500-599	100-199	2015-2017	TRUE
TRUE	YES	NO	FALSE	TRUE	FALSE	1000-1999	0-9	0-9	10-19	20-29	2009-2011	FALSE
TRUE	YES	NO	FALSE	TRUE	FALSE	2000-2999	0-9	0-9	0-9	20-29	2009-2011	FALSE
TRUE	YES	NO	FALSE	TRUE	FALSE	2000-2999	0-9	0-9	0-9	10-19	2012-2014	FALSE
TRUE	YES	NO	FALSE	TRUE	FALSE	3000-3999	0-9	0-9	0-9	20-29	2012-2014	FALSE
TRUE	YES	NO	FALSE	TRUE	FALSE	1000-1999	0-9	0-9	20-29	20-29	2015-2017	FALSE
FALSE	YES	NO	TRUE	FALSE	FALSE	10000-19999	20000-29999	100-199	700-799	20000-29999	2009-2011	FALSE
TRUE	YES	YES	FALSE	FALSE	FALSE	2000-2999	0-9	0-9	20-29	60-69	2009-2011	FALSE
TRUE	YES	NO	FALSE	TRUE	FALSE	1000-1999	0-9	0-9	0-9	20-29	2009-2011	FALSE
TRUE	YES	NO	FALSE	TRUE	FALSE	1000-1999	0-9	0-9	0-9	0-9	2012-2014	FALSE
TRUE	YES	YES	FALSE	FALSE	FALSE	1000-1999	70-79	0-9	500-599	100-199	2009-2011	FALSE
TRUE	YES	NO	FALSE	TRUE	FALSE	1000-1999	0-9	0-9	0-9	0-9	2009-2011	FALSE
TRUE	YES	YES	FALSE	TRUE	FALSE	1000-1999	0-9	0-9	50-59	10-19	2015-2017	FALSE
TRUE	YES	NO	FALSE	TRUE	FALSE	2000-2999	0-9	0-9	10-19	20-29	2012-2014	FALSE
FALSE	YES	NO	FALSE	TRUE	FALSE	2000-2999	6000-6999	600-699	100-199	100000-1999999	2015-2017	TRUE
TRUE	NO	NO	FALSE	TRUE	FALSE	9000-9999	0-9	0-9	0-9	0-9	2015-2017	FALSE
TRUE	YES	YES	FALSE	FALSE	FALSE	2000-2999	0-9	0-9	500-599	10-19	2009-2011	FALSE
TRUE	YES	NO	FALSE	TRUE	FALSE	2000-2999	0-9	0-9	10-19	10-19	2009-2011	FALSE
TRUE	YES	NO	FALSE	TRUE	FALSE	2000-2999	0-9	0-9	30-39	30-39	2012-2014	FALSE
FALSE	YES	NO	TRUE	TRUE	FALSE	30000-39999	10000-19999	0-9	500-599	1000-1999	2012-2014	FALSE
TRUE	YES	YES	FALSE	FALSE	FALSE	4000-4999	0-9	0-9	100-199	50-59	2012-2014	FALSE
TRUE	NO	NO	FALSE	TRUE	FALSE	9000-9999	0-9	0-9	0-9	0-9	2015-2017	FALSE
FALSE	YES	NO	FALSE	TRUE	FALSE	1000-1999	0-9	0-9	20-29	10-19	2012-2014	TRUE
FALSE	YES	NO	FALSE	TRUE	FALSE	2000-2999	0-9	0-9	100-199	0-9	2009-2011	TRUE
FALSE	YES	YES	FALSE	TRUE	FALSE	2000-2999	0-9	0-9	0-9	20-29	2012-2014	TRUE
FALSE	YES	NO	FALSE	TRUE	FALSE	3000-3999	0-9	0-9	0-9	40-49	2009-2011	TRUE
FALSE	YES	NO	FALSE	TRUE	FALSE	1000-1999	0-9	0-9	0-9	10-19	2012-2014	TRUE
FALSE	YES	YES	FALSE	TRUE	TRUE	3000-3999	4000-4999	0-9	200-299	20-29	2015-2017	TRUE
FALSE	NO	NO	FALSE	TRUE	FALSE	9000-9999	0-9	0-9	0-9	0-9	2015-2017	TRUE
FALSE	YES	NO	FALSE	TRUE	TRUE	2000-2999	10000-19999	0-9	1000-1999	100-199	2015-2017	TRUE
FALSE	YES	YES	FALSE	FALSE	FALSE	20000-29999	6000-6999	0-9	600-699	20-29	2009-2011	FALSE
FALSE	YES	NO	TRUE	FALSE	FALSE	30000-39999	10000-19999	0-9	100-199	200-299	2012-2014	TRUE
FALSE	YES	YES	FALSE	FALSE	TRUE	3000-3999	200-299	0-9	100-199	70-79	2009-2011	TRUE
FALSE	YES	NO	TRUE	FALSE	FALSE	10000-19999	500-599	0-9	300-399	100-199	2009-2011	TRUE
TRUE	YES	NO	FALSE	TRUE	TRUE	600-699	7000-7999	0-9	4000-4999	500-599	2012-2014	FALSE
FALSE	YES	YES	TRUE	TRUE	FALSE	5000-5999	200-299	0-9	50-59	100-199	2009-2011	TRUE
FALSE	YES	YES	TRUE	FALSE	FALSE	2000-2999	0-9	0-9	100-199	80-89	2009-2011	TRUE
FALSE	YES	NO	FALSE	TRUE	FALSE	1000-1999	0-9	0-9	10-19	10-19	2012-2014	TRUE
FALSE	YES	YES	FALSE	TRUE	FALSE	4000-4999	0-9	0-9	4000-4999	400-499	2015-2017	TRUE
FALSE	YES	NO	FALSE	TRUE	FALSE	1000-1999	0-9	0-9	0-9	20-29	2012-2014	TRUE
FALSE	YES	NO	FALSE	TRUE	FALSE	1000-1999	0-9	0-9	0-9	10-19	2009-2011	TRUE
FALSE	NO	NO	FALSE	TRUE	FALSE	9000-9999	0-9	0-9	0-9	0-9	2015-2017	TRUE
TRUE	YES	NO	FALSE	TRUE	TRUE	3000-3999	3000-3999	0-9	1000-1999	200-299	2015-2017	FALSE
FALSE	YES	NO	FALSE	FALSE	FALSE	1000-1999	20-29	0-9	200-299	100-199	2009-2011	TRUE
FALSE	YES	NO	FALSE	TRUE	FALSE	2000-2999	0-9	0-9	0-9	10-19	2009-2011	TRUE
FALSE	YES	YES	FALSE	TRUE	FALSE	1000-1999	0-9	0-9	0-9	10-19	2015-2017	TRUE
FALSE	YES	NO	FALSE	TRUE	FALSE	2000-2999	0-9	0-9	0-9	0-9	2009-2011	TRUE
TRUE	YES	NO	FALSE	TRUE	TRUE	90000-99999	70000-79999	100-199	400-499	1000-1999	2009-2011	FALSE
FALSE	YES	NO	FALSE	TRUE	FALSE	2000-2999	0-9	0-9	0-9	10-19	2009-2011	TRUE
FALSE	YES	NO	FALSE	TRUE	FALSE	2000-2999	0-9	0-9	0-9	20-29	2009-2011	TRUE
FALSE	NO	NO	FALSE	TRUE	FALSE	9000-9999	0-9	0-9	20-29	0-9	2015-2017	TRUE
FALSE	YES	YES	FALSE	TRUE	FALSE	1000-1999	0-9	0-9	30-39	30-39	2012-2014	TRUE
FALSE	YES	YES	FALSE	FALSE	FALSE	6000-6999	20000-29999	0-9	700-799	100-199	2009-2011	FALSE
FALSE	YES	NO	FALSE	TRUE	FALSE	3000-3999	0-9	0-9	10-19	30-39	2012-2014	TRUE
FALSE	YES	YES	FALSE	FALSE	TRUE	20000-29999	20000-29999	10-19	200-299	300-399	2015-2017	FALSE
FALSE	NO	NO	FALSE	TRUE	FALSE	9000-9999	0-9	0-9	0-9	0-9	2015-2017	TRUE
FALSE	YES	NO	FALSE	FALSE	FALSE	1000-1999	10-19	0-9	0-9	10-19	2012-2014	TRUE
FALSE	YES	NO	FALSE	TRUE	FALSE	1000-1999	0-9	0-9	0-9	10-19	2009-2011	TRUE
FALSE	YES	YES	TRUE	FALSE	FALSE	1000-1999	3000-3999	0-9	100-199	100-199	2009-2011	FALSE
FALSE	NO	NO	FALSE	TRUE	FALSE	9000-9999	0-9	0-9	20-29	0-9	2015-2017	TRUE
FALSE	YES	NO	FALSE	TRUE	FALSE	4000-4999	0-9	0-9	0-9	30-39	2012-2014	TRUE
FALSE	YES	NO	FALSE	TRUE	FALSE	2000-2999	0-9	0-9	0-9	10-19	2009-2011	TRUE
TRUE	YES	YES	TRUE	TRUE	TRUE	10000-19999	9000-9999	0-9	200-299	200-299	2012-2014	FALSE
FALSE	YES	YES	FALSE	TRUE	FALSE	2000-2999	0-9	0-9	0-9	10-19	2009-2011	TRUE
FALSE	NO	NO	FALSE	TRUE	FALSE	9000-9999	0-9	0-9	0-9	0-9	2015-2017	TRUE
FALSE	YES	NO	FALSE	TRUE	FALSE	4000-4999	0-9	0-9	0-9	30-39	2009-2011	TRUE
FALSE	YES	NO	FALSE	TRUE	FALSE	2000-2999	0-9	0-9	10-19	0-9	2009-2011	TRUE
FALSE	YES	NO	FALSE	TRUE	FALSE	2000-2999	0-9	0-9	0-9	40-49	2009-2011	TRUE
TRUE	NO	NO	FALSE	TRUE	FALSE	10000-19999	20000-29999	50-59	200-299	6000-6999	2015-2017	FALSE
FALSE	YES	NO	FALSE	TRUE	FALSE	3000-3999	0-9	0-9	70-79	10-19	2012-2014	TRUE
FALSE	YES	NO	FALSE	TRUE	FALSE	2000-2999	0-9	0-9	0-9	10-19	2009-2011	TRUE
TRUE	NO	NO	FALSE	TRUE	FALSE	100000-1999999	0-9	80-89	400-499	10000-19999	2015-2017	FALSE
FALSE	YES	NO	FALSE	TRUE	FALSE	1000-1999	0-9	0-9	10-19	20-29	2012-2014	TRUE
FALSE	YES	NO	FALSE	TRUE	FALSE	1000-1999	0-9	0-9	0-9	40-49	2015-2017	TRUE
FALSE	YES	NO	FALSE	FALSE	FALSE	3000-3999	20-29	0-9	20-29	40-49	2012-2014	TRUE
TRUE	NO	NO	FALSE	TRUE	FALSE	100000-1999999	0-9	80-89	400-499	10000-19999	2015-2017	FALSE
FALSE	YES	NO	FALSE	TRUE	FALSE	2000-2999	0-9	0-9	0-9	10-19	2009-2011	TRUE
TRUE	NO	NO	FALSE	TRUE	FALSE	10000-19999	0-9	20-29	90-99	100-199	2015-2017	FALSE
FALSE	YES	NO	FALSE	TRUE	FALSE	2000-2999	0-9	0-9	0-9	20-29	2009-2011	TRUE
FALSE	YES	YES	TRUE	FALSE	TRUE	30000-39999	10000-19999	0-9	400-499	400-499	2009-2011	FALSE
FALSE	YES	YES	FALSE	TRUE	FALSE	1000-1999	0-9	0-9	0-9	10-19	2009-2011	TRUE
FALSE	YES	NO	FALSE	TRUE	FALSE	3000-3999	0-9	0-9	0-9	20-29	2012-2014	TRUE
FALSE	YES	YES	TRUE	TRUE	FALSE	1000-1999	0-9	0-9	40-49	10-19	2009-2011	TRUE
FALSE	YES	NO	FALSE	TRUE	FALSE	2000-2999	0-9	0-9	10-19	10-19	2012-2014	TRUE
FALSE	YES	YES	FALSE	TRUE	FALSE	2000-2999	0-9	0-9	0-9	20-29	2012-2014	TRUE
TRUE	NO	NO	FALSE	TRUE	FALSE	100000-1999999	0-9	100-199	300-399	30000-39999	2015-2017	FALSE
FALSE	YES	NO	FALSE	TRUE	FALSE	1000-1999	0-9	0-9	0-9	0-9	2012-2014	TRUE
FALSE	YES	YES	TRUE	FALSE	TRUE	100000-1999999	3000-3999	30-39	1000-1999	1000-1999	2009-2011	FALSE
FALSE	YES	YES	FALSE	FALSE	FALSE	2000-2999	0-9	0-9	50-59	50-59	2009-2011	TRUE
FALSE	YES	YES	TRUE	TRUE	TRUE	1000-1999	40-49	0-9	80-89	70-79	2009-2011	FALSE
TRUE	NO	NO	FALSE	TRUE	FALSE	100000-1999999	0-9	100-199	300-399	30000-39999	2015-2017	FALSE
TRUE	NO	NO	FALSE	TRUE	FALSE	100000-1999999	10-19	40-49	800-899	7000-7999	2015-2017	FALSE
TRUE	NO	NO	FALSE	FALSE	FALSE	70000-79999	1000-1999	900-999	2000-2999	100000-1999999	2012-2014	FALSE
TRUE	NO	NO	FALSE	TRUE	FALSE	100000-1999999	10-19	40-49	800-899	7000-7999	2015-2017	FALSE
FALSE	YES	NO	FALSE	TRUE	FALSE	2000-2999	0-9	0-9	100-199	20-29	2009-2011	TRUE
FALSE	YES	NO	FALSE	TRUE	FALSE	3000-3999	0-9	0-9	10-19	30-39	2012-2014	TRUE
TRUE	NO	NO	FALSE	TRUE	FALSE	100000-1999999	10-19	40-49	800-899	7000-7999	2015-2017	FALSE
TRUE	YES	NO	FALSE	TRUE	TRUE	4000-4999	3000-3999	0-9	800-899	100-199	2015-2017	FALSE
FALSE	YES	NO	FALSE	TRUE	FALSE	1000-1999	0-9	0-9	30-39	30-39	2012-2014	TRUE
FALSE	YES	NO	FALSE	TRUE	FALSE	1000-1999	0-9	0-9	0-9	10-19	2012-2014	TRUE
FALSE	YES	NO	FALSE	TRUE	FALSE	1000-1999	0-9	0-9	10-19	0-9	2012-2014	TRUE
TRUE	YES	YES	FALSE	TRUE	TRUE	1000-1999	200-299	0-9	3000-3999	200-299	2015-2017	FALSE
FALSE	YES	NO	FALSE	TRUE	FALSE	2000-2999	0-9	0-9	0-9	10-19	2012-2014	TRUE
FALSE	YES	NO	FALSE	FALSE	FALSE	2000-2999	0-9	0-9	0-9	10-19	2012-2014	TRUE
TRUE	NO	NO	FALSE	FALSE	FALSE	90000-99999	0-9	400-499	900-999	70000-79999	2012-2014	FALSE
FALSE	YES	YES	FALSE	FALSE	FALSE	3000-3999	0-9	0-9	100-199	400-499	2009-2011	TRUE
FALSE	YES	NO	FALSE	TRUE	FALSE	2000-2999	0-9	0-9	0-9	20-29	2009-2011	TRUE
FALSE	YES	NO	FALSE	FALSE	FALSE	3000-3999	20-29	0-9	200-299	100-199	2012-2014	TRUE
FALSE	YES	NO	FALSE	TRUE	FALSE	1000-1999	0-9	0-9	0-9	0-9	2009-2011	TRUE
FALSE	YES	NO	TRUE	TRUE	FALSE	2000-2999	0-9	0-9	0-9	0-9	2012-2014	TRUE
FALSE	YES	YES	FALSE	TRUE	FALSE	300-399	0-9	0-9	0-9	0-9	2015-2017	TRUE
FALSE	YES	YES	FALSE	FALSE	TRUE	0-99	100-199	0-9	50-59	10-19	2012-2014	FALSE
FALSE	YES	NO	FALSE	TRUE	FALSE	1000-1999	0-9	0-9	10-19	10-19	2015-2017	TRUE
FALSE	YES	NO	FALSE	TRUE	FALSE	1000-1999	0-9	0-9	0-9	20-29	2009-2011	TRUE
FALSE	YES	NO	FALSE	TRUE	FALSE	2000-2999	0-9	0-9	100-199	60-69	2012-2014	TRUE
FALSE	YES	YES	TRUE	FALSE	FALSE	2000-2999	0-9	0-9	10-19	20-29	2009-2011	TRUE
FALSE	YES	NO	FALSE	TRUE	FALSE	2000-2999	0-9	0-9	0-9	20-29	2009-2011	TRUE
TRUE	YES	NO	FALSE	TRUE	TRUE	2000-2999	0-9	0-9	4000-4999	800-899	2015-2017	FALSE
FALSE	YES	YES	FALSE	FALSE	FALSE	10000-19999	100-199	0-9	800-899	600-699	2012-2014	TRUE
FALSE	YES	NO	FALSE	TRUE	FALSE	2000-2999	0-9	0-9	0-9	20-29	2009-2011	TRUE
FALSE	YES	NO	FALSE	TRUE	FALSE	1000-1999	0-9	0-9	20-29	20-29	2012-2014	TRUE
FALSE	YES	YES	FALSE	FALSE	FALSE	2000-2999	10-19	0-9	100-199	70-79	2012-2014	TRUE
TRUE	NO	NO	FALSE	TRUE	FALSE	100000-1999999	0-9	80-89	400-499	10000-19999	2015-2017	FALSE
FALSE	YES	NO	FALSE	TRUE	FALSE	3000-3999	0-9	0-9	0-9	20-29	2009-2011	TRUE
FALSE	NO	NO	FALSE	TRUE	FALSE	30000-39999	900-999	30-39	1000-1999	1000-1999	2012-2014	FALSE
TRUE	NO	NO	FALSE	TRUE	FALSE	100000-1999999	0-9	80-89	400-499	10000-19999	2015-2017	FALSE
FALSE	YES	NO	FALSE	TRUE	TRUE	200-299	100-199	0-9	500-599	20-29	2015-2017	FALSE
FALSE	YES	NO	TRUE	TRUE	TRUE	30000-39999	10000-19999	0-9	500-599	1000-1999	2012-2014	FALSE
FALSE	YES	YES	TRUE	TRUE	TRUE	20000-29999	2000-2999	80-89	3000-3999	2000-2999	2012-2014	FALSE
FALSE	YES	YES	FALSE	TRUE	FALSE	2000-2999	0-9	0-9	20-29	10-19	2009-2011	TRUE
FALSE	YES	NO	FALSE	TRUE	FALSE	2000-2999	0-9	0-9	10-19	10-19	2009-2011	TRUE
FALSE	YES	NO	TRUE	FALSE	TRUE	5000-5999	6000-6999	0-9	400-499	900-999	2012-2014	FALSE
FALSE	YES	YES	TRUE	FALSE	FALSE	1000-1999	30-39	0-9	0-9	20-29	2012-2014	TRUE
FALSE	YES	YES	FALSE	TRUE	FALSE	20000-29999	0-9	0-9	2000-2999	1000-1999	2015-2017	TRUE
FALSE	YES	YES	FALSE	TRUE	FALSE	1000-1999	0-9	0-9	20-29	10-19	2009-2011	TRUE
FALSE	YES	NO	TRUE	TRUE	FALSE	1000-1999	0-9	0-9	2000-2999	1000-1999	2015-2017	TRUE
FALSE	YES	YES	FALSE	TRUE	TRUE	0-99	20-29	0-9	80-89	0-9	2012-2014	FALSE
FALSE	YES	NO	FALSE	FALSE	FALSE	100000-1999999	0-9	0-9	200-299	1000-1999	2009-2011	FALSE
FALSE	YES	NO	TRUE	FALSE	TRUE	10000-19999	20000-29999	0-9	300-399	400-499	2015-2017	FALSE
TRUE	YES	YES	FALSE	TRUE	FALSE	4000-4999	0-9	0-9	40-49	10-19	2015-2017	FALSE
FALSE	YES	NO	FALSE	TRUE	FALSE	2000-2999	0-9	0-9	0-9	20-29	2012-2014	FALSE
FALSE	YES	NO	FALSE	TRUE	TRUE	2000-2999	0-9	0-9	4000-4999	800-899	2015-2017	TRUE
TRUE	YES	NO	FALSE	TRUE	FALSE	1000-1999	0-9	0-9	20-29	20-29	2015-2017	FALSE
FALSE	YES	YES	FALSE	TRUE	TRUE	200-299	100-199	0-9	700-799	100-199	2015-2017	TRUE
TRUE	YES	NO	FALSE	TRUE	FALSE	1000-1999	0-9	0-9	10-19	0-9	2015-2017	FALSE
TRUE	YES	NO	FALSE	TRUE	FALSE	3000-3999	0-9	0-9	0-9	10-19	2012-2014	FALSE
TRUE	YES	NO	FALSE	TRUE	FALSE	2000-2999	0-9	0-9	0-9	10-19	2009-2011	FALSE
TRUE	YES	NO	FALSE	TRUE	FALSE	2000-2999	0-9	0-9	0-9	10-19	2009-2011	FALSE
FALSE	YES	NO	FALSE	TRUE	TRUE	3000-3999	3000-3999	0-9	1000-1999	200-299	2015-2017	TRUE
TRUE	YES	YES	TRUE	FALSE	FALSE	2000-2999	0-9	0-9	0-9	20-29	2012-2014	FALSE
FALSE	YES	YES	FALSE	TRUE	TRUE	7000-7999	10000-19999	10-19	200-299	500-599	2015-2017	TRUE
TRUE	YES	NO	FALSE	TRUE	FALSE	1000-1999	0-9	0-9	30-39	10-19	2012-2014	FALSE
TRUE	YES	YES	FALSE	TRUE	FALSE	4000-4999	0-9	0-9	2000-2999	300-399	2009-2011	FALSE
TRUE	YES	NO	FALSE	TRUE	FALSE	2000-2999	0-9	0-9	0-9	10-19	2009-2011	FALSE
FALSE	YES	NO	FALSE	TRUE	TRUE	90000-99999	70000-79999	100-199	400-499	1000-1999	2009-2011	TRUE
TRUE	YES	NO	FALSE	TRUE	FALSE	3000-3999	0-9	0-9	0-9	10-19	2009-2011	FALSE
TRUE	YES	NO	FALSE	TRUE	FALSE	1000-1999	0-9	0-9	30-39	10-19	2012-2014	FALSE
TRUE	YES	NO	FALSE	TRUE	FALSE	4000-4999	50-59	0-9	1000-1999	300-399	2009-2011	FALSE
TRUE	YES	NO	FALSE	TRUE	FALSE	1000-1999	0-9	0-9	0-9	10-19	2012-2014	FALSE
TRUE	YES	NO	FALSE	TRUE	FALSE	2000-2999	0-9	0-9	0-9	10-19	2012-2014	FALSE
FALSE	YES	NO	FALSE	TRUE	TRUE	2000-2999	0-9	0-9	4000-4999	800-899	2015-2017	TRUE
TRUE	YES	NO	FALSE	FALSE	FALSE	1000-1999	0-9	0-9	0-9	10-19	2012-2014	FALSE
FALSE	YES	NO	FALSE	TRUE	TRUE	3000-3999	3000-3999	0-9	1000-1999	200-299	2015-2017	TRUE
TRUE	YES	YES	FALSE	TRUE	FALSE	1000-1999	0-9	0-9	10-19	10-19	2009-2011	FALSE
FALSE	YES	YES	TRUE	FALSE	TRUE	10000-19999	2000-2999	10-19	400-499	800-899	2009-2011	FALSE
TRUE	YES	YES	TRUE	FALSE	FALSE	20000-29999	70-79	0-9	400-499	500-599	2009-2011	FALSE
FALSE	YES	YES	TRUE	FALSE	TRUE	20000-29999	10000-19999	0-9	200-299	400-499	2009-2011	FALSE
TRUE	YES	NO	FALSE	TRUE	FALSE	1000-1999	0-9	0-9	0-9	10-19	2012-2014	FALSE
TRUE	YES	YES	FALSE	TRUE	FALSE	2000-2999	0-9	0-9	0-9	10-19	2009-2011	FALSE
FALSE	YES	YES	FALSE	TRUE	TRUE	8000-8999	20000-29999	10-19	1000-1999	200-299	2015-2017	TRUE
TRUE	YES	NO	FALSE	TRUE	FALSE	2000-2999	0-9	0-9	0-9	10-19	2009-2011	FALSE
TRUE	YES	NO	FALSE	TRUE	FALSE	1000-1999	0-9	0-9	0-9	10-19	2012-2014	FALSE
TRUE	YES	NO	FALSE	TRUE	FALSE	2000-2999	0-9	0-9	40-49	50-59	2012-2014	FALSE
FALSE	YES	NO	FALSE	TRUE	TRUE	1000-1999	9000-9999	0-9	500-599	100-199	2015-2017	TRUE
TRUE	YES	NO	FALSE	TRUE	FALSE	1000-1999	0-9	0-9	10-19	20-29	2009-2011	FALSE
TRUE	YES	NO	FALSE	TRUE	FALSE	2000-2999	0-9	0-9	0-9	20-29	2009-2011	FALSE
TRUE	YES	NO	FALSE	TRUE	FALSE	2000-2999	0-9	0-9	0-9	10-19	2012-2014	FALSE
TRUE	YES	NO	FALSE	TRUE	FALSE	3000-3999	0-9	0-9	0-9	20-29	2012-2014	FALSE
TRUE	YES	NO	FALSE	TRUE	FALSE	1000-1999	0-9	0-9	20-29	20-29	2015-2017	FALSE
FALSE	YES	NO	TRUE	FALSE	FALSE	10000-19999	20000-29999	100-199	700-799	20000-29999	2009-2011	FALSE
TRUE	YES	YES	FALSE	FALSE	FALSE	2000-2999	0-9	0-9	20-29	60-69	2009-2011	FALSE
TRUE	YES	NO	FALSE	TRUE	FALSE	1000-1999	0-9	0-9	0-9	20-29	2009-2011	FALSE
TRUE	YES	NO	FALSE	TRUE	FALSE	1000-1999	0-9	0-9	0-9	0-9	2012-2014	FALSE
TRUE	YES	YES	FALSE	FALSE	FALSE	1000-1999	70-79	0-9	500-599	100-199	2009-2011	FALSE
TRUE	YES	NO	FALSE	TRUE	FALSE	1000-1999	0-9	0-9	0-9	0-9	2009-2011	FALSE
TRUE	YES	YES	FALSE	TRUE	FALSE	1000-1999	0-9	0-9	50-59	10-19	2015-2017	FALSE
TRUE	YES	NO	FALSE	TRUE	FALSE	2000-2999	0-9	0-9	10-19	20-29	2012-2014	FALSE
FALSE	YES	NO	FALSE	TRUE	FALSE	2000-2999	6000-6999	600-699	100-199	100000-1999999	2015-2017	TRUE
TRUE	NO	NO	FALSE	TRUE	FALSE	9000-9999	0-9	0-9	0-9	0-9	2015-2017	FALSE
TRUE	YES	YES	FALSE	FALSE	FALSE	2000-2999	0-9	0-9	500-599	10-19	2009-2011	FALSE
TRUE	YES	NO	FALSE	TRUE	FALSE	2000-2999	0-9	0-9	10-19	10-19	2009-2011	FALSE
TRUE	YES	NO	FALSE	TRUE	FALSE	2000-2999	0-9	0-9	30-39	30-39	2012-2014	FALSE
FALSE	YES	NO	TRUE	TRUE	FALSE	30000-39999	10000-19999	0-9	500-599	1000-1999	2012-2014	FALSE
TRUE	YES	YES	FALSE	FALSE	FALSE	4000-4999	0-9	0-9	100-199	50-59	2012-2014	FALSE
TRUE	NO	NO	FALSE	TRUE	FALSE	9000-9999	0-9	0-9	0-9	0-9	2015-2017	FALSE
FALSE	YES	NO	FALSE	TRUE	FALSE	1000-1999	0-9	0-9	20-29	10-19	2012-2014	TRUE
FALSE	YES	NO	FALSE	TRUE	FALSE	2000-2999	0-9	0-9	100-199	0-9	2009-2011	TRUE
FALSE	YES	YES	FALSE	TRUE	FALSE	2000-2999	0-9	0-9	0-9	20-29	2012-2014	TRUE
FALSE	YES	NO	FALSE	TRUE	FALSE	3000-3999	0-9	0-9	0-9	40-49	2009-2011	TRUE
FALSE	YES	NO	FALSE	TRUE	FALSE	1000-1999	0-9	0-9	0-9	10-19	2012-2014	TRUE
FALSE	YES	YES	FALSE	TRUE	TRUE	3000-3999	4000-4999	0-9	200-299	20-29	2015-2017	TRUE
FALSE	NO	NO	FALSE	TRUE	FALSE	9000-9999	0-9	0-9	0-9	0-9	2015-2017	TRUE
FALSE	YES	NO	FALSE	TRUE	TRUE	2000-2999	10000-19999	0-9	1000-1999	100-199	2015-2017	TRUE
FALSE	YES	YES	FALSE	FALSE	FALSE	20000-29999	6000-6999	0-9	600-699	20-29	2009-2011	FALSE
FALSE	YES	NO	TRUE	FALSE	FALSE	30000-39999	10000-19999	0-9	100-199	200-299	2012-2014	TRUE
FALSE	YES	YES	FALSE	FALSE	TRUE	3000-3999	200-299	0-9	100-199	70-79	2009-2011	TRUE
FALSE	YES	NO	TRUE	FALSE	FALSE	10000-19999	500-599	0-9	300-399	100-199	2009-2011	TRUE
TRUE	YES	NO	FALSE	TRUE	TRUE	600-699	7000-7999	0-9	4000-4999	500-599	2012-2014	FALSE
FALSE	YES	YES	TRUE	TRUE	FALSE	5000-5999	200-299	0-9	50-59	100-199	2009-2011	TRUE
FALSE	YES	YES	TRUE	FALSE	FALSE	2000-2999	0-9	0-9	100-199	80-89	2009-2011	TRUE
FALSE	YES	NO	FALSE	TRUE	FALSE	1000-1999	0-9	0-9	10-19	10-19	2012-2014	TRUE
FALSE	YES	YES	FALSE	TRUE	FALSE	4000-4999	0-9	0-9	4000-4999	400-499	2015-2017	TRUE
FALSE	YES	NO	FALSE	TRUE	FALSE	1000-1999	0-9	0-9	0-9	20-29	2012-2014	TRUE
FALSE	YES	NO	FALSE	TRUE	FALSE	1000-1999	0-9	0-9	0-9	10-19	2009-2011	TRUE
FALSE	NO	NO	FALSE	TRUE	FALSE	9000-9999	0-9	0-9	0-9	0-9	2015-2017	TRUE
TRUE	YES	NO	FALSE	TRUE	TRUE	3000-3999	3000-3999	0-9	1000-1999	200-299	2015-2017	FALSE
FALSE	YES	NO	FALSE	FALSE	FALSE	1000-1999	20-29	0-9	200-299	100-199	2009-2011	TRUE
FALSE	YES	NO	FALSE	TRUE	FALSE	2000-2999	0-9	0-9	0-9	10-19	2009-2011	TRUE
FALSE	YES	YES	FALSE	TRUE	FALSE	1000-1999	0-9	0-9	0-9	10-19	2015-2017	TRUE
FALSE	YES	NO	FALSE	TRUE	FALSE	2000-2999	0-9	0-9	0-9	0-9	2009-2011	TRUE
TRUE	YES	NO	FALSE	TRUE	TRUE	90000-99999	70000-79999	100-199	400-499	1000-1999	2009-2011	FALSE
FALSE	YES	NO	FALSE	TRUE	FALSE	2000-2999	0-9	0-9	0-9	10-19	2009-2011	TRUE
FALSE	YES	NO	FALSE	TRUE	FALSE	2000-2999	0-9	0-9	0-9	20-29	2009-2011	TRUE
FALSE	NO	NO	FALSE	TRUE	FALSE	9000-9999	0-9	0-9	20-29	0-9	2015-2017	TRUE
FALSE	YES	YES	FALSE	TRUE	FALSE	1000-1999	0-9	0-9	30-39	30-39	2012-2014	TRUE
FALSE	YES	YES	FALSE	FALSE	FALSE	6000-6999	20000-29999	0-9	700-799	100-199	2009-2011	FALSE
TRUE	YES	NO	FALSE	FALSE	TRUE	2000-2999	2000-2999	0-9	100-199	600-699	2015-2017	FALSE
FALSE	YES	NO	FALSE	TRUE	FALSE	2000-2999	0-9	0-9	0-9	20-29	2009-2011	TRUE
TRUE	YES	NO	FALSE	TRUE	TRUE	0-99	0-9	0-9	90-99	40-49	2015-2017	FALSE
FALSE	YES	NO	FALSE	TRUE	FALSE	1000-1999	0-9	0-9	80-89	0-9	2015-2017	TRUE
FALSE	YES	NO	FALSE	TRUE	FALSE	1000-1999	0-9	0-9	0-9	0-9	2009-2011	TRUE
FALSE	YES	NO	FALSE	TRUE	FALSE	3000-3999	10-19	0-9	10-19	30-39	2009-2011	TRUE
FALSE	YES	YES	FALSE	TRUE	FALSE	2000-2999	50-59	0-9	90-99	70-79	2015-2017	TRUE
FALSE	YES	YES	TRUE	FALSE	FALSE	1000-1999	0-9	0-9	20-29	20-29	2012-2014	TRUE
FALSE	YES	YES	FALSE	TRUE	FALSE	2000-2999	0-9	0-9	20-29	20-29	2012-2014	TRUE
FALSE	YES	NO	FALSE	TRUE	FALSE	3000-3999	0-9	0-9	0-9	10-19	2012-2014	TRUE
FALSE	YES	NO	FALSE	TRUE	FALSE	2000-2999	0-9	0-9	20-29	10-19	2012-2014	TRUE
FALSE	YES	NO	FALSE	FALSE	FALSE	1000-1999	60-69	0-9	100-199	30-39	2012-2014	TRUE
FALSE	NO	YES	FALSE	FALSE	FALSE	4000-4999	0-9	100-199	10000-99999	10000-19999	2012-2014	TRUE
FALSE	YES	NO	FALSE	TRUE	FALSE	3000-3999	0-9	0-9	60-69	20-29	2015-2017	TRUE
TRUE	YES	YES	FALSE	TRUE	TRUE	800-899	0-9	0-9	400-499	20-29	2015-2017	FALSE
FALSE	YES	NO	FALSE	TRUE	FALSE	2000-2999	0-9	0-9	0-9	10-19	2012-2014	TRUE
FALSE	YES	NO	FALSE	TRUE	FALSE	3000-3999	3000-3999	0-9	500-599	80-89	2009-2011	FALSE
FALSE	YES	NO	FALSE	TRUE	FALSE	2000-2999	0-9	0-9	0-9	20-29	2012-2014	TRUE
FALSE	YES	YES	FALSE	FALSE	FALSE	1000-1999	10-19	0-9	20-29	30-39	2012-2014	TRUE
FALSE	YES	NO	FALSE	TRUE	FALSE	2000-2999	0-9	0-9	0-9	20-29	2009-2011	TRUE
FALSE	YES	NO	FALSE	TRUE	FALSE	1000-1999	0-9	0-9	0-9	0-9	2012-2014	TRUE
FALSE	YES	NO	FALSE	TRUE	FALSE	1000-1999	0-9	0-9	0-9	10-19	2012-2014	TRUE
FALSE	YES	YES	FALSE	FALSE	FALSE	1000-1999	0-9	0-9	0-9	10-19	2009-2011	TRUE
FALSE	YES	NO	TRUE	FALSE	TRUE	30000-39999	20000-29999	0-9	700-799	1000-1999	2012-2014	FALSE
FALSE	YES	NO	FALSE	TRUE	FALSE	1000-1999	0-9	0-9	0-9	10-19	2012-2014	TRUE
FALSE	YES	NO	TRUE	FALSE	FALSE	2000-2999	0-9	0-9	0-9	10-19	2009-2011	TRUE
FALSE	YES	NO	FALSE	TRUE	FALSE	2000-2999	0-9	0-9	10-19	10-19	2012-2014	TRUE
FALSE	YES	NO	FALSE	TRUE	FALSE	1000-1999	0-9	0-9	0-9	10-19	2009-2011	TRUE
FALSE	YES	NO	FALSE	TRUE	FALSE	1000-1999	0-9	0-9	0-9	0-9	2015-2017	TRUE
FALSE	YES	YES	FALSE	TRUE	FALSE	900-999	2000-2999	0-9	300-399	100-199	2015-2017	FALSE
TRUE	NO	NO	FALSE	FALSE	FALSE	8000-8999	1000-1999	10-19	1000-1999	6000-6999	2012-2014	FALSE
FALSE	YES	NO	FALSE	FALSE	FALSE	2000-2999	0-9	0-9	20-29	20-29	2009-2011	TRUE
FALSE	YES	NO	FALSE	TRUE	FALSE	2000-2999	60-69	0-9	100-199	60-69	2009-2011	TRUE
FALSE	YES	NO	FALSE	TRUE	FALSE	1000-1999	0-9	0-9	10-19	20-29	2009-2011	TRUE
FALSE	YES	NO	FALSE	FALSE	FALSE	2000-2999	0-9	0-9	0-9	10-19	2009-2011	TRUE
FALSE	YES	NO	FALSE	TRUE	FALSE	1000-1999	0-9	0-9	0-9	20-29	2012-2014	TRUE
FALSE	YES	NO	TRUE	TRUE	FALSE	2000-2999	3000-3999	0-9	10-19	10-19	2012-2014	TRUE
FALSE	YES	NO	FALSE	TRUE	FALSE	2000-2999	0-9	0-9	0-9	10-19	2012-2014	TRUE
FALSE	YES	NO	FALSE	TRUE	FALSE	1000-1999	0-9	0-9	20-29	20-29	2009-2011	TRUE
TRUE	NO	NO	FALSE	TRUE	FALSE	100000-1999999	10-19	100-199	700-799	20000-29999	2015-2017	FALSE
TRUE	YES	YES	FALSE	TRUE	TRUE	30000-39999	10000-19999	0-9	5000-5999	400-499	2015-2017	FALSE
FALSE	YES	YES	TRUE	FALSE	TRUE	20000-29999	10000-19999	10-19	400-499	200-299	2012-2014	FALSE
FALSE	YES	YES	FALSE	TRUE	FALSE	2000-2999	0-9	0-9	0-9	10-19	2009-2011	TRUE
FALSE	YES	YES	FALSE	FALSE	FALSE	1000-1999	0-9	0-9	0-9	10-19	2009-2011	TRUE
FALSE	YES	NO	FALSE	TRUE	FALSE	3000-3999	0-9	0-9	20-29	30-39	2009-2011	TRUE
FALSE	YES	NO	TRUE	FALSE	FALSE	8000-8999	500-599	10-19	1000-1999	400-499	2009-2011	TRUE
TRUE	YES	YES	FALSE	FALSE	TRUE	200-299	300-399	0-9	200-299	40-49	2015-2017	FALSE
FALSE	YES	NO	FALSE	TRUE	FALSE	2000-2999	0-9	0-9	20-29	20-29	2012-2014	TRUE
FALSE	YES	NO	FALSE	TRUE	FALSE	1000-1999	0-9	0-9	40-49	20-29	2012-2014	TRUE
FALSE	YES	NO	FALSE	TRUE	FALSE	1000-1999	0-9	0-9	0-9	0-9	2009-2011	TRUE
FALSE	YES	NO	FALSE	TRUE	FALSE	1000-1999	0-9	0-9	0-9	0-9	2012-2014	TRUE
TRUE	YES	NO	FALSE	TRUE	TRUE	700-799	2000-2999	0-9	800-899	200-299	2015-2017	FALSE
FALSE	YES	YES	FALSE	TRUE	TRUE	2000-2999	1000-1999	0-9	100-199	100-199	2015-2017	FALSE
FALSE	YES	NO	FALSE	TRUE	FALSE	3000-3999	0-9	0-9	50-59	40-49	2012-2014	TRUE
TRUE	NO	NO	FALSE	TRUE	FALSE	100000-1999999	0-9	100-199	300-399	30000-39999	2015-2017	FALSE
FALSE	YES	NO	FALSE	FALSE	FALSE	1000-1999	40-49	0-9	80-89	30-39	2012-2014	TRUE
TRUE	YES	NO	FALSE	TRUE	TRUE	2000-2999	50-59	10-19	1000-1999	900-999	2015-2017	FALSE
FALSE	YES	NO	FALSE	TRUE	FALSE	1000-1999	0-9	0-9	10-19	10-19	2012-2014	TRUE
FALSE	YES	NO	FALSE	TRUE	FALSE	2000-2999	0-9	0-9	0-9	30-39	2012-2014	TRUE
TRUE	NO	NO	FALSE	TRUE	FALSE	100000-1999999	0-9	100-199	300-399	30000-39999	2015-2017	FALSE
FALSE	YES	YES	TRUE	TRUE	FALSE	1000-1999	0-9	0-9	10-19	20-29	2009-2011	TRUE
TRUE	YES	YES	FALSE	TRUE	TRUE	100-199	30-39	0-9	300-399	90-99	2015-2017	FALSE
FALSE	YES	YES	TRUE	FALSE	FALSE	3000-3999	0-9	0-9	100-199	60-69	2009-2011	TRUE
FALSE	YES	NO	FALSE	TRUE	FALSE	2000-2999	0-9	0-9	0-9	10-19	2012-2014	TRUE
FALSE	YES	NO	FALSE	TRUE	FALSE	1000-1999	0-9	0-9	0-9	10-19	2012-2014	TRUE
FALSE	YES	NO	FALSE	FALSE	FALSE	1000-1999	0-9	0-9	0-9	10-19	2009-2011	TRUE
TRUE	NO	NO	FALSE	TRUE	FALSE	4000-4999	0-9	0-9	0-9	1000-1999	2015-2017	FALSE
TRUE	YES	NO	FALSE	TRUE	TRUE	900-999	300-399	0-9	90-99	50-59	2015-2017	FALSE
FALSE	YES	NO	FALSE	TRUE	FALSE	1000-1999	0-9	0-9	0-9	10-19	2009-2011	TRUE
FALSE	YES	YES	TRUE	TRUE	FALSE	3000-3999	0-9	0-9	0-9	30-39	2009-2011	TRUE
FALSE	YES	NO	FALSE	TRUE	FALSE	2000-2999	0-9	0-9	0-9	30-39	2009-2011	TRUE
FALSE	YES	NO	FALSE	TRUE	FALSE	1000-1999	0-9	0-9	80-89	10-19	2012-2014	TRUE
TRUE	NO	NO	FALSE	FALSE	FALSE	7000-7999	0-9	0-9	0-9	2000-2999	2015-2017	FALSE
FALSE	YES	YES	FALSE	TRUE	FALSE	2000-2999	0-9	0-9	10-19	20-29	2012-2014	TRUE
FALSE	YES	NO	FALSE	TRUE	FALSE	2000-2999	0-9	0-9	10-19	10-19	2012-2014	FALSE
FALSE	YES	YES	TRUE	FALSE	TRUE	100000-1999999	500-599	10-19	3000-3999	4000-4999	2009-2011	FALSE
FALSE	YES	NO	FALSE	TRUE	FALSE	4000-4999	0-9	0-9	0-9	30-39	2012-2014	TRUE
TRUE	YES	NO	FALSE	TRUE	TRUE	2000-2999	0-9	0-9	4000-4999	800-899	2015-2017	FALSE
FALSE	YES	YES	TRUE	TRUE	FALSE	20000-29999	1000-1999	10-19	2000-2999	900-999	2012-2014	FALSE
FALSE	YES	NO	FALSE	TRUE	FALSE	1000-1999	0-9	0-9	10-19	0-9	2015-2017	TRUE
FALSE	YES	NO	FALSE	TRUE	FALSE	4000-4999	0-9	0-9	0-9	30-39	2009-2011	TRUE
FALSE	YES	YES	TRUE	FALSE	FALSE	10000-19999	10000-19999	0-9	300-399	200-299	2009-2011	TRUE
FALSE	YES	NO	FALSE	TRUE	FALSE	1000-1999	0-9	0-9	10-19	10-19	2009-2011	TRUE
FALSE	NO	YES	FALSE	TRUE	FALSE	10000-19999	10000-19999	20-29	200-299	300-399	2009-2011	FALSE
FALSE	YES	NO	FALSE	TRUE	FALSE	2000-2999	0-9	0-9	0-9	0-9	2009-2011	TRUE
FALSE	YES	NO	FALSE	TRUE	FALSE	2000-2999	0-9	0-9	20-29	20-29	2012-2014	TRUE
TRUE	NO	NO	FALSE	TRUE	FALSE	6000-6999	0-9	0-9	0-9	600-699	2015-2017	FALSE
FALSE	YES	NO	FALSE	TRUE	FALSE	3000-3999	0-9	0-9	0-9	20-29	2009-2011	TRUE
FALSE	YES	NO	FALSE	TRUE	FALSE	2000-2999	0-9	0-9	0-9	10-19	2009-2011	TRUE
FALSE	YES	YES	TRUE	TRUE	FALSE	1000-1999	0-9	0-9	60-69	30-39	2012-2014	TRUE
