# Supplementary material for: Application of interval type-2 fuzzy logic and type-1 fuzzy logic-based approaches to social networks for spam detection with combined feature capabilities
Source: PeerJ Comput Sci. 2023 Apr 21;9:e1316. doi: 10.7717/peerj-cs.1316 (PMC10280623; doi:10.7717/peerj-cs.1316)
Supplement: Supplemental Information 6 — This was used on ML and FL for Spam metrics evaluations. In the proposed model, two different datasets are used. Evaluations are made on the results obtained from these data sets. This shows the 70.0% test and training dataset. [file peerj-cs-09-1316-s006.xlsx]

## Sheet: Sayfa1
CMFTR	USC	UFC		CLASS	T1F_Mam_out	T1F_Mam_Predicted_Result	T1F_Sug_out	T1F_Sug_Predicted_Result	T2F_Mam_out	T2F_Mam_Predicted_Result	T2F_Sug_out	T2F_Sug_Predicted_Result
43	2663	0		0	0.325958	0	0.286058	0	0.322906	0	0.285275	0
43	2962	2		0	0.325958	0	0.285884	0	0.322906	0	0.285275	0
43	2887	3		0	0.325958	0	0.285927	0	0.322906	0	0.285275	0
43	2928	8		0	0.325958	0	0.285903	0	0.322906	0	0.285275	0
43	2712	7		0	0.325958	0	0.286046	0	0.322906	0	0.285275	0
44	1075	5		0	0.338648	0	0.286782	0	0.334638	0	0.285667	0
44	1499	0		0	0.338648	0	0.286782	0	0.334638	0	0.285667	0
44	1174	0		0	0.338648	0	0.286782	0	0.334638	0	0.285667	0
44	1088	9		0	0.338648	0	0.286782	0	0.334638	0	0.285667	0
44	1212	5		0	0.338648	0	0.286782	0	0.334638	0	0.285667	0
45	4794	9		0	0.347004	0	0.285197	0	0.340931	0	0.285856	0
45	4304	0		0	0.347004	0	0.285197	0	0.340931	0	0.285856	0
45	4014	4		0	0.347004	0	0.285326	0	0.340931	0	0.286355	0
45	4744	1		0	0.347004	0	0.285197	0	0.340931	0	0.285856	0
45	4284	2		0	0.347004	0	0.285197	0	0.340931	0	0.285856	0
44	2390	6		0	0.338648	0	0.286782	0	0.334638	0	0.285667	0
44	2764	9		0	0.338648	0	0.286663	0	0.334638	0	0.285667	0
44	2934	6		0	0.338648	0	0.286448	0	0.334638	0	0.285667	0
44	2938	1		0	0.338648	0	0.286443	0	0.334638	0	0.285667	0
44	2310	8		0	0.338648	0	0.286782	0	0.334638	0	0.285667	0
44	3109	8		0	0.338648	0	0.286253	0	0.334638	0	0.285667	0
44	3418	7		0	0.338648	0	0.285959	0	0.334638	0	0.285667	0
44	3160	2		0	0.338648	0	0.2862	0	0.334638	0	0.285667	0
44	3055	8		0	0.338648	0	0.28631	0	0.334638	0	0.285667	0
44	3765	7		0	0.338648	0	0.285716	0	0.334638	0	0.285666	0
44	1352	0		0	0.338648	0	0.286782	0	0.334638	0	0.285667	0
44	1073	7		0	0.338648	0	0.286782	0	0.334638	0	0.285667	0
44	1823	4		0	0.338648	0	0.286782	0	0.334638	0	0.285667	0
44	1241	6		0	0.338648	0	0.286782	0	0.334638	0	0.285667	0
44	1056	8		0	0.338648	0	0.286782	0	0.334638	0	0.285667	0
44	4598	57		0	0.338648	0	0.28545	0	0.334638	0	0.285423	0
44	4679	57		0	0.338648	0	0.285427	0	0.334638	0	0.285404	0
44	4299	55		0	0.338648	0	0.285539	0	0.334638	0	0.285508	0
44	4540	59		0	0.338648	0	0.285467	0	0.334638	0	0.285438	0
44	4926	50		0	0.338648	0	0.28536	0	0.334638	0	0.285354	0
44	1731	5		0	0.338648	0	0.286782	0	0.334638	0	0.285667	0
44	1361	7		0	0.338648	0	0.286782	0	0.334638	0	0.285667	0
44	1895	9		0	0.338648	0	0.286782	0	0.334638	0	0.285667	0
44	1971	0		0	0.338648	0	0.286782	0	0.334638	0	0.285667	0
44	1011	9		0	0.338648	0	0.286782	0	0.334638	0	0.285667	0
44	2260	8		0	0.338648	0	0.286782	0	0.334638	0	0.285667	0
44	2745	7		0	0.338648	0	0.286689	0	0.334638	0	0.285667	0
44	2398	2		0	0.338648	0	0.286782	0	0.334638	0	0.285667	0
44	2688	8		0	0.338648	0	0.286782	0	0.334638	0	0.285667	0
44	2002	3		0	0.338648	0	0.286782	0	0.334638	0	0.285667	0
40	1307	3		0	0.285945	0	0.286224	0	0.280582	0	0.285153	0
40	1270	9		0	0.285945	0	0.286224	0	0.280582	0	0.285153	0
40	1867	9		0	0.285945	0	0.286224	0	0.280582	0	0.285153	0
40	1718	7		0	0.285945	0	0.286224	0	0.280582	0	0.285153	0
40	1229	8		0	0.285945	0	0.286224	0	0.280582	0	0.285153	0
45	1987	4		0	0.347004	0	0.287203	0	0.340931	0	0.286814	0
45	1516	2		0	0.347004	0	0.287203	0	0.340931	0	0.286814	0
45	1945	8		0	0.347004	0	0.287203	0	0.340931	0	0.286814	0
45	1216	2		0	0.347004	0	0.287203	0	0.340931	0	0.286814	0
45	1686	1		0	0.347004	0	0.287203	0	0.340931	0	0.286814	0
27	16736	2204		0	0.5	0	0.415937	0	0.5	0	0.436624	0
27	12938	2263		0	0.5	0	0.414553	0	0.5	0	0.436624	0
27	11421	2090		0	0.5	0	0.418695	0	0.5	0	0.436624	0
27	19633	2678		0	0.5	0	0.405579	0	0.5	0	0.436624	0
27	15705	2941		0	0.5	0	0.400501	0	0.5	0	0.436624	0
43	22825	71		0	0.325958	0	0.284624	0	0.322906	0	0.285083	0
43	23917	71		0	0.325958	0	0.284624	0	0.322906	0	0.285083	0
43	22797	77		0	0.325958	0	0.284624	0	0.322906	0	0.285083	0
43	25657	72		0	0.325958	0	0.285037	0	0.322906	0	0.285123	0
43	23769	78		0	0.325958	0	0.284624	0	0.322906	0	0.285083	0
27	29171	19577		0	0.332527	0	0.28319	0	0.340094	0	0.28489	0
27	24091	15529		0	0.5	0	0.389754	0	0.5	0	0.436624	0
27	28834	12840		0	0.332527	0	0.28319	0	0.340094	0	0.28489	0
27	24776	13991		0	0.5	0	0.389754	0	0.5	0	0.436624	0
27	20313	13198		0	0.5	0	0.389754	0	0.5	0	0.436624	0
44	1601	4		0	0.338648	0	0.286782	0	0.334638	0	0.285667	0
44	1988	3		0	0.338648	0	0.286782	0	0.334638	0	0.285667	0
44	1074	7		0	0.338648	0	0.286782	0	0.334638	0	0.285667	0
44	1356	5		0	0.338648	0	0.286782	0	0.334638	0	0.285667	0
44	1206	7		0	0.338648	0	0.286782	0	0.334638	0	0.285667	0
45	2225	3		0	0.347004	0	0.287203	0	0.340931	0	0.286814	0
45	2996	5		0	0.347004	0	0.28652	0	0.340931	0	0.286813	0
45	2227	5		0	0.347004	0	0.287203	0	0.340931	0	0.286814	0
45	2272	1		0	0.347004	0	0.287203	0	0.340931	0	0.286814	0
45	2348	4		0	0.347004	0	0.287203	0	0.340931	0	0.286814	0
44	2283	5		0	0.338648	0	0.286782	0	0.334638	0	0.285667	0
44	2558	4		0	0.338648	0	0.286782	0	0.334638	0	0.285667	0
44	2297	8		0	0.338648	0	0.286782	0	0.334638	0	0.285667	0
44	2945	6		0	0.338648	0	0.286435	0	0.334638	0	0.285667	0
44	2756	3		0	0.338648	0	0.286674	0	0.334638	0	0.285667	0
44	1560	1		0	0.338648	0	0.286782	0	0.334638	0	0.285667	0
44	1089	4		0	0.338648	0	0.286782	0	0.334638	0	0.285667	0
44	1424	8		0	0.338648	0	0.286782	0	0.334638	0	0.285667	0
44	1050	1		0	0.338648	0	0.286782	0	0.334638	0	0.285667	0
44	1201	3		0	0.338648	0	0.286782	0	0.334638	0	0.285667	0
44	2553	4		0	0.338648	0	0.286782	0	0.334638	0	0.285667	0
44	2970	5		0	0.338648	0	0.286406	0	0.334638	0	0.285667	0
44	2603	2		0	0.338648	0	0.286782	0	0.334638	0	0.285667	0
44	2653	5		0	0.338648	0	0.286782	0	0.334638	0	0.285667	0
44	2668	5		0	0.338648	0	0.286782	0	0.334638	0	0.285667	0
44	1623	6		0	0.338648	0	0.286782	0	0.334638	0	0.285667	0
44	1296	9		0	0.338648	0	0.286782	0	0.334638	0	0.285667	0
44	1683	2		0	0.338648	0	0.286782	0	0.334638	0	0.285667	0
44	1424	0		0	0.338648	0	0.286782	0	0.334638	0	0.285667	0
44	1730	7		0	0.338648	0	0.286782	0	0.334638	0	0.285667	0
44	2086	2		0	0.338648	0	0.286782	0	0.334638	0	0.285667	0
44	2857	2		0	0.338648	0	0.286542	0	0.334638	0	0.285667	0
44	2942	1		0	0.338648	0	0.286439	0	0.334638	0	0.285667	0
44	2991	2		0	0.338648	0	0.286382	0	0.334638	0	0.285667	0
44	2810	1		0	0.338648	0	0.286602	0	0.334638	0	0.285667	0
44	2811	3		0	0.338648	0	0.286601	0	0.334638	0	0.285667	0
44	2478	6		0	0.338648	0	0.286782	0	0.334638	0	0.285667	0
44	2284	4		0	0.338648	0	0.286782	0	0.334638	0	0.285667	0
44	2453	9		0	0.338648	0	0.286782	0	0.334638	0	0.285667	0
44	2287	3		0	0.338648	0	0.286782	0	0.334638	0	0.285667	0
44	3371	5		0	0.338648	0	0.286	0	0.334638	0	0.285667	0
44	3901	6		0	0.338648	0	0.285669	0	0.334638	0	0.285666	0
44	3410	5		0	0.338648	0	0.285966	0	0.334638	0	0.285667	0
44	3830	7		0	0.338648	0	0.285693	0	0.334638	0	0.285666	0
44	3973	6		0	0.338648	0	0.285644	0	0.334638	0	0.285637	0
44	1201	7		0	0.338648	0	0.286782	0	0.334638	0	0.285667	0
44	1655	5		0	0.338648	0	0.286782	0	0.334638	0	0.285667	0
44	1108	1		0	0.338648	0	0.286782	0	0.334638	0	0.285667	0
44	1885	0		0	0.338648	0	0.286782	0	0.334638	0	0.285667	0
44	1587	8		0	0.338648	0	0.286782	0	0.334638	0	0.285667	0
10	17484	20990		0	0.369771	0	0.342082	0	0.373771	0	0.349933	0
10	17284	29993		0	0.28319	0	0.28319	0	0.286167	0	0.28489	0
10	18142	24180		0	0.339588	0	0.323941	0	0.340511	0	0.328054	0
10	17400	20759		0	0.371856	0	0.343309	0	0.376051	0	0.351398	0
10	16445	27412		0	0.306657	0	0.302503	0	0.303683	0	0.301337	0
41	2399	5		0	0.294022	0	0.285707	0	0.289753	0	0.285113	0
41	2513	5		0	0.294022	0	0.285707	0	0.289753	0	0.285113	0
41	2793	8		0	0.294022	0	0.285674	0	0.289753	0	0.285113	0
41	2395	9		0	0.294022	0	0.285707	0	0.289753	0	0.285113	0
41	2160	3		0	0.294022	0	0.285707	0	0.289753	0	0.285113	0
44	1722	0		0	0.338648	0	0.286782	0	0.334638	0	0.285667	0
44	1145	6		0	0.338648	0	0.286782	0	0.334638	0	0.285667	0
44	1186	1		0	0.338648	0	0.286782	0	0.334638	0	0.285667	0
44	1237	8		0	0.338648	0	0.286782	0	0.334638	0	0.285667	0
44	1919	3		0	0.338648	0	0.286782	0	0.334638	0	0.285667	0
44	1350	4		0	0.338648	0	0.286782	0	0.334638	0	0.285667	0
44	1162	0		0	0.338648	0	0.286782	0	0.334638	0	0.285667	0
44	1623	9		0	0.338648	0	0.286782	0	0.334638	0	0.285667	0
44	1551	0		0	0.338648	0	0.286782	0	0.334638	0	0.285667	0
44	1849	1		0	0.338648	0	0.286782	0	0.334638	0	0.285667	0
41	1513	76		0	0.294022	0	0.285707	0	0.289753	0	0.285113	0
41	1378	72		0	0.294022	0	0.285707	0	0.289753	0	0.285113	0
41	1266	78		0	0.294022	0	0.285707	0	0.289753	0	0.285113	0
41	1596	76		0	0.294022	0	0.285707	0	0.289753	0	0.285113	0
41	1107	70		0	0.294022	0	0.285707	0	0.289753	0	0.285113	0
44	1008	9		0	0.338648	0	0.286782	0	0.334638	0	0.285667	0
44	1362	2		0	0.338648	0	0.286782	0	0.334638	0	0.285667	0
44	1689	0		0	0.338648	0	0.286782	0	0.334638	0	0.285667	0
44	1404	2		0	0.338648	0	0.286782	0	0.334638	0	0.285667	0
44	1236	8		0	0.338648	0	0.286782	0	0.334638	0	0.285667	0
45	1081	0		0	0.347004	0	0.287203	0	0.340931	0	0.286814	0
45	1463	3		0	0.347004	0	0.287203	0	0.340931	0	0.286814	0
45	1091	5		0	0.347004	0	0.287203	0	0.340931	0	0.286814	0
45	1589	6		0	0.347004	0	0.287203	0	0.340931	0	0.286814	0
45	1840	1		0	0.347004	0	0.287203	0	0.340931	0	0.286814	0
44	2258	0		0	0.338648	0	0.286782	0	0.334638	0	0.285667	0
44	2643	6		0	0.338648	0	0.286782	0	0.334638	0	0.285667	0
44	2038	8		0	0.338648	0	0.286782	0	0.334638	0	0.285667	0
44	2060	8		0	0.338648	0	0.286782	0	0.334638	0	0.285667	0
44	2739	2		0	0.338648	0	0.2867	0	0.334638	0	0.285667	0
36	9396	6		0	0.297842	0	0.291985	0	0.287833	0	0.28601	0
36	9470	5		0	0.297842	0	0.291964	0	0.287833	0	0.286007	0
36	9264	8		0	0.297842	0	0.292024	0	0.287833	0	0.286016	0
36	9777	8		0	0.297842	0	0.291875	0	0.287833	0	0.285994	0
36	9494	4		0	0.297842	0	0.291957	0	0.287833	0	0.286006	0
41	2981	4		0	0.294022	0	0.28563	0	0.289753	0	0.285113	0
41	2439	0		0	0.294022	0	0.285707	0	0.289753	0	0.285113	0
41	2171	0		0	0.294022	0	0.285707	0	0.289753	0	0.285113	0
41	2007	0		0	0.294022	0	0.285707	0	0.289753	0	0.285113	0
41	2277	6		0	0.294022	0	0.285707	0	0.289753	0	0.285113	0
44	2712	5		0	0.338648	0	0.286756	0	0.334638	0	0.285667	0
44	2856	8		0	0.338648	0	0.286544	0	0.334638	0	0.285667	0
44	2289	6		0	0.338648	0	0.286782	0	0.334638	0	0.285667	0
44	2620	0		0	0.338648	0	0.286782	0	0.334638	0	0.285667	0
44	2980	1		0	0.338648	0	0.286394	0	0.334638	0	0.285667	0
44	2125	2		0	0.338648	0	0.286782	0	0.334638	0	0.285667	0
44	2356	5		0	0.338648	0	0.286782	0	0.334638	0	0.285667	0
44	2838	3		0	0.338648	0	0.286566	0	0.334638	0	0.285667	0
44	2718	1		0	0.338648	0	0.286743	0	0.334638	0	0.285667	0
44	2566	0		0	0.338648	0	0.286782	0	0.334638	0	0.285667	0
14	36531	12378		0	0.297498	0	0.28319	0	0.300878	0	0.28489	0
14	39166	18782		0	0.28685	0	0.28319	0	0.300878	0	0.28489	0
14	37181	16295		0	0.28685	0	0.28319	0	0.300878	0	0.28489	0
14	31129	10565		0	0.302586	0	0.28319	0	0.300878	0	0.28489	0
14	36850	16996		0	0.28685	0	0.28319	0	0.300878	0	0.28489	0
41	4743	6		0	0.294022	0	0.285448	0	0.289753	0	0.285104	0
41	4679	1		0	0.294022	0	0.285454	0	0.289753	0	0.285104	0
41	4700	1		0	0.294022	0	0.285452	0	0.289753	0	0.285104	0
41	4163	8		0	0.294022	0	0.285505	0	0.289753	0	0.28511	0
41	4385	8		0	0.294022	0	0.285483	0	0.289753	0	0.285108	0
36	9332	4		0	0.297842	0	0.292004	0	0.287833	0	0.286013	0
36	9653	4		0	0.297842	0	0.29191	0	0.287833	0	0.285999	0
36	9493	9		0	0.297842	0	0.291957	0	0.287833	0	0.286006	0
36	9023	2		0	0.297842	0	0.292096	0	0.287833	0	0.286026	0
36	9040	6		0	0.297842	0	0.292091	0	0.287833	0	0.286025	0
9	28645	6567		0	0.293924	0	0.28319	0	0.292029	0	0.28489	0
9	25883	6012		0	0.337018	0	0.321784	0	0.328701	0	0.321889	0
9	29867	6312		0	0.293383	0	0.28319	0	0.291485	0	0.28489	0
9	29406	6872		0	0.294566	0	0.28319	0	0.292673	0	0.28489	0
9	29472	6167		0	0.29307	0	0.28319	0	0.29117	0	0.28489	0
60	619	7216		0	0.295306	0	0.28319	0	0.293417	0	0.28489	0
60	659	7294		0	0.295476	0	0.28319	0	0.293589	0	0.28489	0
60	643	7780		0	0.296512	0	0.28319	0	0.29463	0	0.28489	0
60	612	7323		0	0.29554	0	0.28319	0	0.293653	0	0.28489	0
60	615	7571		0	0.296071	0	0.28319	0	0.294187	0	0.28489	0
60	3569	3350		0	0.287188	0	0.28319	0	0.286965	0	0.28489	0
60	3138	3907		0	0.288329	0	0.28319	0	0.287138	0	0.28489	0
60	3120	3469		0	0.287433	0	0.28319	0	0.286965	0	0.28489	0
60	3380	3264		0	0.287007	0	0.28319	0	0.286965	0	0.28489	0
60	3995	3254		0	0.286986	0	0.28319	0	0.286965	0	0.28489	0
60	95559	74536		0	0.303298	0	0.28319	0	0.301452	0	0.28489	0
60	98087	72712		0	0.300802	0	0.28319	0	0.298944	0	0.28489	0
60	96083	78291		0	0.303655	0	0.28319	0	0.30181	0	0.28489	0
60	95072	74728		0	0.302629	0	0.28319	0	0.30078	0	0.28489	0
60	95420	76435		0	0.303105	0	0.28319	0	0.301258	0	0.28489	0
9	6262	29424		0	0.285124	0	0.285485	0	0.284616	0	0.286328	0
9	6312	21302		0	0.366923	0	0.362219	0	0.36585	0	0.372352	0
9	6853	27564		0	0.305043	0	0.306632	0	0.298811	0	0.304152	0
9	6059	20665		0	0.372699	0	0.368175	0	0.372042	0	0.379534	0
9	6336	29480		0	0.28451	0	0.284748	0	0.284294	0	0.28587	0
25	21779	22018		0	0.484886	0	0.38292	0	0.5	1	0.426637	0
25	20195	24994		0	0.434069	0	0.357402	0	0.5	1	0.426637	0
25	21977	26091		0	0.412013	0	0.344838	0	0.49712	0	0.426637	0
25	25493	28077		0	0.366655	0	0.320394	0	0.392522	0	0.384479	0
25	23104	26154		0	0.410685	0	0.344047	0	0.495544	0	0.426637	0
11	1095	3009		0	0.654048	1	0.64126	1	0.653658	1	0.675154	1
11	1300	3172		0	0.650781	1	0.637717	1	0.650583	1	0.671147	1
11	1719	3083		0	0.652563	1	0.639648	1	0.652257	1	0.673325	1
11	1383	3655		0	0.641062	1	0.627372	1	0.641603	1	0.659745	1
11	1438	3434		0	0.645525	1	0.632077	1	0.645698	1	0.664877	1
63	16354	9519		0	0.300295	0	0.28319	0	0.298434	0	0.28489	0
63	17710	9618		0	0.300504	0	0.28319	0	0.298644	0	0.28489	0
63	12585	9099		0	0.299365	0	0.28319	0	0.297499	0	0.28489	0
63	11988	9406		0	0.300049	0	0.28319	0	0.298187	0	0.28489	0
63	12386	9971		0	0.301267	0	0.28319	0	0.299411	0	0.28489	0
36	17317	24230		0	0.297842	0	0.288616	0	0.287833	0	0.285604	0
36	12628	26271		0	0.297842	0	0.289729	0	0.287833	0	0.285782	0
36	12381	21801		0	0.297842	0	0.288694	0	0.287833	0	0.285616	0
36	15223	26574		0	0.297842	0	0.28941	0	0.287833	0	0.28573	0
36	18094	22968		0	0.297842	0	0.288302	0	0.287833	0	0.285556	0
36	804905	4		0	0.289549	0	0.28319	0	0.28667	0	0.28489	0
36	743140	8		0	0.289549	0	0.28319	0	0.28667	0	0.28489	0
36	699908	1		0	0.289549	0	0.28319	0	0.28667	0	0.28489	0
36	430435	0		0	0.289549	0	0.28319	0	0.28667	0	0.28489	0
36	261362	8		0	0.289549	0	0.28319	0	0.28667	0	0.28489	0
36	114690	0		0	0.289549	0	0.28319	0	0.28667	0	0.28489	0
36	378656	9		0	0.289549	0	0.28319	0	0.28667	0	0.28489	0
36	969779	5		0	0.289549	0	0.28319	0	0.28667	0	0.28489	0
36	863545	8		0	0.289549	0	0.28319	0	0.28667	0	0.28489	0
36	189374	3		0	0.289549	0	0.28319	0	0.28667	0	0.28489	0
36	13833	9		0	0.297842	0	0.29085	0	0.287833	0	0.285848	0
36	11436	6		0	0.297842	0	0.291424	0	0.287833	0	0.285929	0
36	17398	4		0	0.297842	0	0.29013	0	0.287833	0	0.285749	0
36	13247	2		0	0.297842	0	0.290983	0	0.287833	0	0.285867	0
36	13829	9		0	0.297842	0	0.290851	0	0.287833	0	0.285849	0
27	30871	16009		0	0.332527	0	0.28319	0	0.340094	0	0.28489	0
27	35674	11910		0	0.332527	0	0.28319	0	0.340094	0	0.28489	0
27	32661	16879		0	0.332527	0	0.28319	0	0.340094	0	0.28489	0
27	30320	13104		0	0.332527	0	0.28319	0	0.340094	0	0.28489	0
27	36400	14264		0	0.332527	0	0.28319	0	0.340094	0	0.28489	0
36	217593	5		0	0.289549	0	0.28319	0	0.28667	0	0.28489	0
36	212111	4		0	0.289549	0	0.28319	0	0.28667	0	0.28489	0
36	218949	0		0	0.289549	0	0.28319	0	0.28667	0	0.28489	0
36	687441	8		0	0.289549	0	0.28319	0	0.28667	0	0.28489	0
36	980404	9		0	0.289549	0	0.28319	0	0.28667	0	0.28489	0
27	593525	3033		0	0.332527	0	0.28319	0	0.340094	0	0.28489	0
27	506316	3046		0	0.332527	0	0.28319	0	0.340094	0	0.28489	0
27	941735	3640		0	0.332527	0	0.28319	0	0.340094	0	0.28489	0
27	175072	3510		0	0.332527	0	0.28319	0	0.340094	0	0.28489	0
27	431237	3561		0	0.332527	0	0.28319	0	0.340094	0	0.28489	0
31	1817	48		0	0.598337	1	0.61082	1	0.48508	0	0.508663	1
31	1076	45		0	0.598337	1	0.61082	1	0.48508	0	0.508663	1
31	1865	45		0	0.598337	1	0.61082	1	0.48508	0	0.508663	1
31	1181	43		0	0.598337	1	0.61082	1	0.48508	0	0.508663	1
31	1834	49		0	0.598337	1	0.61082	1	0.48508	0	0.508663	1
36	121091	6		0	0.289549	0	0.28319	0	0.28667	0	0.28489	0
36	615257	6		0	0.289549	0	0.28319	0	0.28667	0	0.28489	0
36	392851	3		0	0.289549	0	0.28319	0	0.28667	0	0.28489	0
36	572421	9		0	0.289549	0	0.28319	0	0.28667	0	0.28489	0
36	461717	3		0	0.289549	0	0.28319	0	0.28667	0	0.28489	0
36	842681	14		0	0.289549	0	0.28319	0	0.28667	0	0.28489	0
36	181711	18		0	0.289549	0	0.28319	0	0.28667	0	0.28489	0
36	285740	14		0	0.289549	0	0.28319	0	0.28667	0	0.28489	0
36	813916	16		0	0.289549	0	0.28319	0	0.28667	0	0.28489	0
36	713558	19		0	0.289549	0	0.28319	0	0.28667	0	0.28489	0
32	71968	1004		0	0.341445	0	0.28319	0	0.33945	0	0.28489	0
32	78295	1775		0	0.341445	0	0.28319	0	0.33945	0	0.28489	0
32	73024	1212		0	0.341445	0	0.28319	0	0.33945	0	0.28489	0
32	75230	1203		0	0.341445	0	0.28319	0	0.33945	0	0.28489	0
32	76248	1794		0	0.341445	0	0.28319	0	0.33945	0	0.28489	0
36	239505	13		0	0.289549	0	0.28319	0	0.28667	0	0.28489	0
36	173170	16		0	0.289549	0	0.28319	0	0.28667	0	0.28489	0
36	665435	15		0	0.289549	0	0.28319	0	0.28667	0	0.28489	0
36	187261	16		0	0.289549	0	0.28319	0	0.28667	0	0.28489	0
36	130089	17		0	0.289549	0	0.28319	0	0.28667	0	0.28489	0
36	326024	10		0	0.289549	0	0.28319	0	0.28667	0	0.28489	0
36	747234	12		0	0.289549	0	0.28319	0	0.28667	0	0.28489	0
36	389047	13		0	0.289549	0	0.28319	0	0.28667	0	0.28489	0
36	133874	15		0	0.289549	0	0.28319	0	0.28667	0	0.28489	0
36	830675	11		0	0.289549	0	0.28319	0	0.28667	0	0.28489	0
60	4431	3471		0	0.287437	0	0.28319	0	0.286965	0	0.28489	0
60	4137	3131		0	0.286729	0	0.28319	0	0.286965	0	0.28489	0
60	4018	3844		0	0.288199	0	0.28319	0	0.287071	0	0.28489	0
60	4365	3957		0	0.288433	0	0.28319	0	0.287192	0	0.28489	0
60	4017	3196		0	0.286865	0	0.28319	0	0.286965	0	0.28489	0
61	1189	276		0	0.28319	0	0.28319	0	0.28314	0	0.28489	0
61	1435	227		0	0.28319	0	0.28319	0	0.28314	0	0.28489	0
61	1912	229		0	0.28319	0	0.28319	0	0.28314	0	0.28489	0
61	1190	296		0	0.28319	0	0.28319	0	0.28314	0	0.28489	0
61	1709	221		0	0.28319	0	0.28319	0	0.28314	0	0.28489	0
32	99040	5		0	0.341445	0	0.28319	0	0.33945	0	0.28489	0
32	94510	3		0	0.341445	0	0.28319	0	0.33945	0	0.28489	0
32	95278	8		0	0.341445	0	0.28319	0	0.33945	0	0.28489	0
32	99713	0		0	0.341445	0	0.28319	0	0.33945	0	0.28489	0
32	97986	2		0	0.341445	0	0.28319	0	0.33945	0	0.28489	0
25	5	106		0	0.670649	1	0.708396	1	0.660772	1	0.744309	1
25	6	128		0	0.669579	1	0.706523	1	0.659264	1	0.736263	1
25	6	146		0	0.668707	1	0.705003	1	0.658043	1	0.730092	1
25	0	181		0	0.667019	1	0.702079	1	0.655695	1	0.719037	1
25	9	117		0	0.670114	1	0.707458	1	0.660015	1	0.740214	1
60	2320	7		0	0.28319	0	0.28319	0	0.286965	0	0.28489	0
60	2161	2		0	0.28319	0	0.28319	0	0.286965	0	0.28489	0
60	2052	7		0	0.28319	0	0.28319	0	0.286965	0	0.28489	0
60	2981	7		0	0.28319	0	0.28319	0	0.286965	0	0.28489	0
60	2695	1		0	0.28319	0	0.28319	0	0.286965	0	0.28489	0
36	283532	8		0	0.289549	0	0.28319	0	0.28667	0	0.28489	0
36	848630	6		0	0.289549	0	0.28319	0	0.28667	0	0.28489	0
36	602088	6		0	0.289549	0	0.28319	0	0.28667	0	0.28489	0
36	929082	9		0	0.289549	0	0.28319	0	0.28667	0	0.28489	0
36	779813	0		0	0.289549	0	0.28319	0	0.28667	0	0.28489	0
4	36912	965		0	0.28319	0	0.28319	0	0.280794	0	0.28489	0
4	37873	994		0	0.28319	0	0.28319	0	0.280824	0	0.28489	0
4	33535	960		0	0.28319	0	0.28319	0	0.280789	0	0.28489	0
4	32098	954		0	0.28319	0	0.28319	0	0.280783	0	0.28489	0
4	36673	959		0	0.28319	0	0.28319	0	0.280788	0	0.28489	0
36	359870	6		0	0.289549	0	0.28319	0	0.28667	0	0.28489	0
36	134983	6		0	0.289549	0	0.28319	0	0.28667	0	0.28489	0
36	491324	5		0	0.289549	0	0.28319	0	0.28667	0	0.28489	0
36	248987	4		0	0.289549	0	0.28319	0	0.28667	0	0.28489	0
36	290185	0		0	0.289549	0	0.28319	0	0.28667	0	0.28489	0
28	226	166		0	0.657868	1	0.697333	1	0.647881	1	0.678481	1
28	254	160		0	0.658344	1	0.698174	1	0.648697	1	0.682049	1
28	207	137		0	0.660179	1	0.701431	1	0.651881	1	0.697325	1
28	269	153		0	0.658901	1	0.69916	1	0.649656	1	0.686416	1
28	263	131		0	0.66066	1	0.702289	1	0.652721	1	0.701787	1
30	31364	14017		0	0.339144	0	0.28319	0	0.342877	0	0.28489	0
30	37880	10978		0	0.339144	0	0.28319	0	0.342877	0	0.28489	0
30	38875	17918		0	0.339144	0	0.28319	0	0.342877	0	0.28489	0
30	33533	12483		0	0.339144	0	0.28319	0	0.342877	0	0.28489	0
30	35379	14619		0	0.339144	0	0.28319	0	0.342877	0	0.28489	0
31	26157	2227		0	0.486722	0	0.359027	0	0.48508	0	0.400867	0
31	22851	2579		0	0.5	0	0.365098	0	0.48508	0	0.400867	0
31	21226	2260		0	0.5	0	0.365098	0	0.48508	0	0.400867	0
31	24788	2052		0	0.5	0	0.365098	0	0.48508	0	0.400867	0
31	25033	2280		0	0.5	0	0.365098	0	0.48508	0	0.400867	0
26	5419	6985		0	0.5	0	0.432534	0	0.5	0	0.431438	0
26	5663	6941		0	0.5	0	0.428626	0	0.5	0	0.431438	0
26	5195	6301		0	0.5	0	0.436311	0	0.5	0	0.431438	0
26	5173	6926		0	0.5	0	0.436692	0	0.5	0	0.431438	0
26	5956	6530		0	0.5	0	0.424195	0	0.5	0	0.431438	0
29	1	29		0	0.658938	1	0.704243	1	0.649666	1	0.705772	1
29	3	27		0	0.658938	1	0.704243	1	0.649666	1	0.705772	1
29	0	21		0	0.658938	1	0.704243	1	0.649666	1	0.705772	1
29	5	23		0	0.658938	1	0.704243	1	0.649666	1	0.705772	1
29	3	26		0	0.658938	1	0.704243	1	0.649666	1	0.705772	1
8	725469	9		0	0.28319	0	0.28319	0	0.281661	0	0.28489	0
8	775803	3		0	0.28319	0	0.28319	0	0.281661	0	0.28489	0
8	717691	5		0	0.28319	0	0.28319	0	0.281661	0	0.28489	0
8	548161	5		0	0.28319	0	0.28319	0	0.281661	0	0.28489	0
8	496742	3		0	0.28319	0	0.28319	0	0.281661	0	0.28489	0
26	12082	25461		0	0.440827	0	0.360498	0	0.5	0	0.431438	0
26	13445	28928		0	0.350966	0	0.301218	0	0.369099	0	0.359153	0
26	15710	28027		0	0.377364	0	0.321091	0	0.41002	0	0.405796	0
26	18336	21433		0	0.5	0	0.389778	0	0.5	0	0.431438	0
26	19480	24093		0	0.46881	0	0.37504	0	0.5	0	0.431438	0
45	4375	0		0	0.347004	0	0.285197	0	0.340931	0	0.285856	0
45	4938	4		0	0.347004	0	0.285197	0	0.340931	0	0.285856	0
45	4511	7		0	0.347004	0	0.285197	0	0.340931	0	0.285856	0
45	4376	5		0	0.347004	0	0.285197	0	0.340931	0	0.285856	0
45	4581	1		0	0.347004	0	0.285197	0	0.340931	0	0.285856	0
12	2910	7		0	0.706436	1	0.705917	1	0.699326	1	0.746771	1
12	2668	2		0	0.708979	1	0.709556	1	0.700841	1	0.749556	1
12	2781	7		0	0.707995	1	0.708145	1	0.700255	1	0.748474	1
12	2912	7		0	0.706412	1	0.705883	1	0.699312	1	0.746745	1
12	2197	4		0	0.708979	1	0.709556	1	0.700841	1	0.749556	1
44	1280	6		0	0.338648	0	0.286782	0	0.334638	0	0.285667	0
44	1327	2		0	0.338648	0	0.286782	0	0.334638	0	0.285667	0
44	1698	9		0	0.338648	0	0.286782	0	0.334638	0	0.285667	0
44	1315	5		0	0.338648	0	0.286782	0	0.334638	0	0.285667	0
44	1897	1		0	0.338648	0	0.286782	0	0.334638	0	0.285667	0
44	1509	7		0	0.338648	0	0.286782	0	0.334638	0	0.285667	0
44	1818	1		0	0.338648	0	0.286782	0	0.334638	0	0.285667	0
44	1056	8		0	0.338648	0	0.286782	0	0.334638	0	0.285667	0
44	1264	9		0	0.338648	0	0.286782	0	0.334638	0	0.285667	0
44	1239	5		0	0.338648	0	0.286782	0	0.334638	0	0.285667	0
44	3206	9		0	0.338648	0	0.286154	0	0.334638	0	0.285667	0
44	3559	4		0	0.338648	0	0.285843	0	0.334638	0	0.285666	0
44	3772	7		0	0.338648	0	0.285714	0	0.334638	0	0.285666	0
44	3569	4		0	0.338648	0	0.285836	0	0.334638	0	0.285666	0
44	3507	7		0	0.338648	0	0.285885	0	0.334638	0	0.285666	0
44	2543	3		0	0.338648	0	0.286782	0	0.334638	0	0.285667	0
44	2032	8		0	0.338648	0	0.286782	0	0.334638	0	0.285667	0
44	2571	9		0	0.338648	0	0.286782	0	0.334638	0	0.285667	0
44	2959	8		0	0.338648	0	0.286419	0	0.334638	0	0.285667	0
44	2829	3		0	0.338648	0	0.286578	0	0.334638	0	0.285667	0
44	2975	4		0	0.338648	0	0.2864	0	0.334638	0	0.285667	0
44	2721	1		0	0.338648	0	0.286737	0	0.334638	0	0.285667	0
44	2646	8		0	0.338648	0	0.286782	0	0.334638	0	0.285667	0
44	2043	1		0	0.338648	0	0.286782	0	0.334638	0	0.285667	0
44	2597	4		0	0.338648	0	0.286782	0	0.334638	0	0.285667	0
43	2195	9		0	0.325958	0	0.286058	0	0.322906	0	0.285275	0
43	2752	2		0	0.325958	0	0.286009	0	0.322906	0	0.285275	0
43	2530	7		0	0.325958	0	0.286058	0	0.322906	0	0.285275	0
43	2902	6		0	0.325958	0	0.285918	0	0.322906	0	0.285275	0
43	2484	5		0	0.325958	0	0.286058	0	0.322906	0	0.285275	0
44	1219	1		0	0.338648	0	0.286782	0	0.334638	0	0.285667	0
44	1485	1		0	0.338648	0	0.286782	0	0.334638	0	0.285667	0
44	1282	8		0	0.338648	0	0.286782	0	0.334638	0	0.285667	0
44	1480	6		0	0.338648	0	0.286782	0	0.334638	0	0.285667	0
44	1684	5		0	0.338648	0	0.286782	0	0.334638	0	0.285667	0
45	4666	0		0	0.347004	0	0.285197	0	0.340931	0	0.285856	0
45	4057	5		0	0.347004	0	0.285294	0	0.340931	0	0.28624	0
45	4064	6		0	0.347004	0	0.285289	0	0.340931	0	0.286223	0
45	4206	3		0	0.347004	0	0.285203	0	0.340931	0	0.285952	0
45	4517	6		0	0.347004	0	0.285197	0	0.340931	0	0.285856	0
44	2723	8		0	0.338648	0	0.286733	0	0.334638	0	0.285667	0
44	2503	1		0	0.338648	0	0.286782	0	0.334638	0	0.285667	0
44	2742	6		0	0.338648	0	0.286693	0	0.334638	0	0.285667	0
44	2198	6		0	0.338648	0	0.286782	0	0.334638	0	0.285667	0
44	2810	0		0	0.338648	0	0.286602	0	0.334638	0	0.285667	0
44	3414	0		0	0.338648	0	0.285963	0	0.334638	0	0.285667	0
44	3512	0		0	0.338648	0	0.285881	0	0.334638	0	0.285666	0
44	3151	5		0	0.338648	0	0.286209	0	0.334638	0	0.285667	0
44	3453	7		0	0.338648	0	0.28593	0	0.334638	0	0.285666	0
44	3962	2		0	0.338648	0	0.285648	0	0.334638	0	0.285642	0
44	1307	9		0	0.338648	0	0.286782	0	0.334638	0	0.285667	0
44	1795	1		0	0.338648	0	0.286782	0	0.334638	0	0.285667	0
44	1473	5		0	0.338648	0	0.286782	0	0.334638	0	0.285667	0
44	1255	7		0	0.338648	0	0.286782	0	0.334638	0	0.285667	0
44	1555	6		0	0.338648	0	0.286782	0	0.334638	0	0.285667	0
44	4310	50		0	0.338648	0	0.285536	0	0.334638	0	0.285504	0
44	4520	54		0	0.338648	0	0.285473	0	0.334638	0	0.285443	0
44	4581	52		0	0.338648	0	0.285455	0	0.334638	0	0.285427	0
44	4640	56		0	0.338648	0	0.285438	0	0.334638	0	0.285413	0
44	4552	56		0	0.338648	0	0.285463	0	0.334638	0	0.285435	0
44	1704	1		0	0.338648	0	0.286782	0	0.334638	0	0.285667	0
44	1766	7		0	0.338648	0	0.286782	0	0.334638	0	0.285667	0
44	1537	9		0	0.338648	0	0.286782	0	0.334638	0	0.285667	0
44	1156	3		0	0.338648	0	0.286782	0	0.334638	0	0.285667	0
44	1237	8		0	0.338648	0	0.286782	0	0.334638	0	0.285667	0
44	2090	3		0	0.338648	0	0.286782	0	0.334638	0	0.285667	0
44	2331	8		0	0.338648	0	0.286782	0	0.334638	0	0.285667	0
44	2776	5		0	0.338648	0	0.286647	0	0.334638	0	0.285667	0
44	2827	7		0	0.338648	0	0.28658	0	0.334638	0	0.285667	0
44	2055	4		0	0.338648	0	0.286782	0	0.334638	0	0.285667	0
40	1783	9		0	0.285945	0	0.286224	0	0.280582	0	0.285153	0
40	1793	5		0	0.285945	0	0.286224	0	0.280582	0	0.285153	0
40	1653	1		0	0.285945	0	0.286224	0	0.280582	0	0.285153	0
40	1692	7		0	0.285945	0	0.286224	0	0.280582	0	0.285153	0
40	1042	6		0	0.285945	0	0.286224	0	0.280582	0	0.285153	0
45	1623	3		0	0.347004	0	0.287203	0	0.340931	0	0.286814	0
45	1052	2		0	0.347004	0	0.287203	0	0.340931	0	0.286814	0
45	1737	6		0	0.347004	0	0.287203	0	0.340931	0	0.286814	0
45	1337	0		0	0.347004	0	0.287203	0	0.340931	0	0.286814	0
45	1681	7		0	0.347004	0	0.287203	0	0.340931	0	0.286814	0
27	19701	2474		0	0.5	0	0.409832	0	0.5	0	0.436624	0
27	15318	2167		0	0.5	0	0.41682	0	0.5	0	0.436624	0
27	14010	2213		0	0.5	0	0.415724	0	0.5	0	0.436624	0
27	18406	2445		0	0.5	0	0.410461	0	0.5	0	0.436624	0
27	11662	2489		0	0.5	0	0.409509	0	0.5	0	0.436624	0
43	28484	76		0	0.324153	0	0.28319	0	0.322751	0	0.28489	0
43	20861	79		0	0.325958	0	0.284624	0	0.322906	0	0.285083	0
43	29027	73		0	0.324153	0	0.28319	0	0.322751	0	0.28489	0
43	26666	74		0	0.324153	0	0.28319	0	0.322751	0	0.28489	0
43	21764	75		0	0.325958	0	0.284624	0	0.322906	0	0.285083	0
27	20561	17880		0	0.5	0	0.389754	0	0.5	0	0.436624	0
27	29877	15372		0	0.332527	0	0.28319	0	0.340094	0	0.28489	0
27	22338	12356		0	0.5	0	0.389754	0	0.5	0	0.436624	0
27	28122	14091		0	0.332527	0	0.28319	0	0.340094	0	0.28489	0
27	21417	11634		0	0.5	0	0.389754	0	0.5	0	0.436624	0
44	1425	3		0	0.338648	0	0.286782	0	0.334638	0	0.285667	0
44	1238	4		0	0.338648	0	0.286782	0	0.334638	0	0.285667	0
44	1774	8		0	0.338648	0	0.286782	0	0.334638	0	0.285667	0
44	1199	7		0	0.338648	0	0.286782	0	0.334638	0	0.285667	0
44	1333	6		0	0.338648	0	0.286782	0	0.334638	0	0.285667	0
45	2555	8		0	0.347004	0	0.287203	0	0.340931	0	0.286814	0
45	2507	3		0	0.347004	0	0.287203	0	0.340931	0	0.286814	0
45	2346	9		0	0.347004	0	0.287203	0	0.340931	0	0.286814	0
45	2004	6		0	0.347004	0	0.287203	0	0.340931	0	0.286814	0
45	2282	0		0	0.347004	0	0.287203	0	0.340931	0	0.286814	0
44	2940	0		0	0.338648	0	0.286441	0	0.334638	0	0.285667	0
44	2038	4		0	0.338648	0	0.286782	0	0.334638	0	0.285667	0
44	2174	7		0	0.338648	0	0.286782	0	0.334638	0	0.285667	0
44	2169	7		0	0.338648	0	0.286782	0	0.334638	0	0.285667	0
44	2777	3		0	0.338648	0	0.286646	0	0.334638	0	0.285667	0
44	1535	0		0	0.338648	0	0.286782	0	0.334638	0	0.285667	0
44	1397	1		0	0.338648	0	0.286782	0	0.334638	0	0.285667	0
44	1597	5		0	0.338648	0	0.286782	0	0.334638	0	0.285667	0
44	1343	1		0	0.338648	0	0.286782	0	0.334638	0	0.285667	0
44	1191	4		0	0.338648	0	0.286782	0	0.334638	0	0.285667	0
44	2503	7		0	0.338648	0	0.286782	0	0.334638	0	0.285667	0
44	2681	9		0	0.338648	0	0.286782	0	0.334638	0	0.285667	0
44	2278	7		0	0.338648	0	0.286782	0	0.334638	0	0.285667	0
44	2820	6		0	0.338648	0	0.286589	0	0.334638	0	0.285667	0
44	2997	9		0	0.338648	0	0.286375	0	0.334638	0	0.285667	0
44	1157	6		0	0.338648	0	0.286782	0	0.334638	0	0.285667	0
44	1227	5		0	0.338648	0	0.286782	0	0.334638	0	0.285667	0
44	1209	9		0	0.338648	0	0.286782	0	0.334638	0	0.285667	0
44	1397	5		0	0.338648	0	0.286782	0	0.334638	0	0.285667	0
44	1003	1		0	0.338648	0	0.286782	0	0.334638	0	0.285667	0
44	2806	0		0	0.338648	0	0.286608	0	0.334638	0	0.285667	0
44	2477	6		0	0.338648	0	0.286782	0	0.334638	0	0.285667	0
44	2626	6		0	0.338648	0	0.286782	0	0.334638	0	0.285667	0
44	2211	4		0	0.338648	0	0.286782	0	0.334638	0	0.285667	0
44	2042	6		0	0.338648	0	0.286782	0	0.334638	0	0.285667	0
44	2399	6		0	0.338648	0	0.286782	0	0.334638	0	0.285667	0
44	2220	0		0	0.338648	0	0.286782	0	0.334638	0	0.285667	0
44	2111	0		0	0.338648	0	0.286782	0	0.334638	0	0.285667	0
44	2431	8		0	0.338648	0	0.286782	0	0.334638	0	0.285667	0
44	2298	7		0	0.338648	0	0.286782	0	0.334638	0	0.285667	0
44	3920	4		0	0.338648	0	0.285662	0	0.334638	0	0.285666	0
44	3058	8		0	0.338648	0	0.286307	0	0.334638	0	0.285667	0
44	3699	4		0	0.338648	0	0.28574	0	0.334638	0	0.285666	0
44	3501	7		0	0.338648	0	0.28589	0	0.334638	0	0.285666	0
44	3515	4		0	0.338648	0	0.285879	0	0.334638	0	0.285666	0
44	1946	6		0	0.338648	0	0.286782	0	0.334638	0	0.285667	0
44	1807	2		0	0.338648	0	0.286782	0	0.334638	0	0.285667	0
44	1124	9		0	0.338648	0	0.286782	0	0.334638	0	0.285667	0
44	1966	5		0	0.338648	0	0.286782	0	0.334638	0	0.285667	0
44	1603	0		0	0.338648	0	0.286782	0	0.334638	0	0.285667	0
10	15608	28303		0	0.297217	0	0.295327	0	0.293743	0	0.292705	0
10	12182	27514		0	0.305575	0	0.303766	0	0.302463	0	0.302343	0
10	19181	23436		0	0.346833	0	0.327447	0	0.348538	0	0.332335	0
10	15180	26213		0	0.319135	0	0.312509	0	0.317702	0	0.313777	0
10	11568	26113		0	0.320163	0	0.315992	0	0.318854	0	0.31785	0
41	2655	7		0	0.294022	0	0.285707	0	0.289753	0	0.285113	0
41	2060	0		0	0.294022	0	0.285707	0	0.289753	0	0.285113	0
41	2687	8		0	0.294022	0	0.285707	0	0.289753	0	0.285113	0
41	2661	7		0	0.294022	0	0.285707	0	0.289753	0	0.285113	0
41	2053	0		0	0.294022	0	0.285707	0	0.289753	0	0.285113	0
44	1486	9		0	0.338648	0	0.286782	0	0.334638	0	0.285667	0
44	1180	5		0	0.338648	0	0.286782	0	0.334638	0	0.285667	0
44	1178	2		0	0.338648	0	0.286782	0	0.334638	0	0.285667	0
44	1597	2		0	0.338648	0	0.286782	0	0.334638	0	0.285667	0
44	1974	7		0	0.338648	0	0.286782	0	0.334638	0	0.285667	0
44	1599	1		0	0.338648	0	0.286782	0	0.334638	0	0.285667	0
44	1297	1		0	0.338648	0	0.286782	0	0.334638	0	0.285667	0
44	1965	3		0	0.338648	0	0.286782	0	0.334638	0	0.285667	0
44	1922	6		0	0.338648	0	0.286782	0	0.334638	0	0.285667	0
44	1650	2		0	0.338648	0	0.286782	0	0.334638	0	0.285667	0
41	1880	78		0	0.294022	0	0.285707	0	0.289753	0	0.285113	0
41	1963	78		0	0.294022	0	0.285707	0	0.289753	0	0.285113	0
41	1515	71		0	0.294022	0	0.285707	0	0.289753	0	0.285113	0
41	1509	72		0	0.294022	0	0.285707	0	0.289753	0	0.285113	0
41	1555	73		0	0.294022	0	0.285707	0	0.289753	0	0.285113	0
44	1069	6		0	0.338648	0	0.286782	0	0.334638	0	0.285667	0
44	1763	7		0	0.338648	0	0.286782	0	0.334638	0	0.285667	0
44	1594	7		0	0.338648	0	0.286782	0	0.334638	0	0.285667	0
44	1564	3		0	0.338648	0	0.286782	0	0.334638	0	0.285667	0
44	1684	2		0	0.338648	0	0.286782	0	0.334638	0	0.285667	0
45	1613	5		0	0.347004	0	0.287203	0	0.340931	0	0.286814	0
45	1922	3		0	0.347004	0	0.287203	0	0.340931	0	0.286814	0
45	1260	3		0	0.347004	0	0.287203	0	0.340931	0	0.286814	0
45	1350	7		0	0.347004	0	0.287203	0	0.340931	0	0.286814	0
45	1769	1		0	0.347004	0	0.287203	0	0.340931	0	0.286814	0
44	2924	2		0	0.338648	0	0.28646	0	0.334638	0	0.285667	0
44	2211	8		0	0.338648	0	0.286782	0	0.334638	0	0.285667	0
44	2832	4		0	0.338648	0	0.286574	0	0.334638	0	0.285667	0
44	2383	8		0	0.338648	0	0.286782	0	0.334638	0	0.285667	0
44	2771	3		0	0.338648	0	0.286654	0	0.334638	0	0.285667	0
36	9636	1		0	0.297842	0	0.291915	0	0.287833	0	0.286	0
36	9255	1		0	0.297842	0	0.292027	0	0.287833	0	0.286016	0
36	9104	8		0	0.297842	0	0.292072	0	0.287833	0	0.286022	0
36	9360	2		0	0.297842	0	0.291996	0	0.287833	0	0.286011	0
36	9518	3		0	0.297842	0	0.29195	0	0.287833	0	0.286005	0
41	2914	7		0	0.294022	0	0.285643	0	0.289753	0	0.285113	0
41	2663	0		0	0.294022	0	0.285707	0	0.289753	0	0.285113	0
41	2273	9		0	0.294022	0	0.285707	0	0.289753	0	0.285113	0
41	2393	5		0	0.294022	0	0.285707	0	0.289753	0	0.285113	0
41	2156	6		0	0.294022	0	0.285707	0	0.289753	0	0.285113	0
44	2288	1		0	0.338648	0	0.286782	0	0.334638	0	0.285667	0
44	2419	2		0	0.338648	0	0.286782	0	0.334638	0	0.285667	0
44	2309	5		0	0.338648	0	0.286782	0	0.334638	0	0.285667	0
44	2456	8		0	0.338648	0	0.286782	0	0.334638	0	0.285667	0
44	2333	9		0	0.338648	0	0.286782	0	0.334638	0	0.285667	0
44	2339	3		0	0.338648	0	0.286782	0	0.334638	0	0.285667	0
44	2658	7		0	0.338648	0	0.286782	0	0.334638	0	0.285667	0
44	2371	2		0	0.338648	0	0.286782	0	0.334638	0	0.285667	0
44	2749	1		0	0.338648	0	0.286684	0	0.334638	0	0.285667	0
44	2738	0		0	0.338648	0	0.286702	0	0.334638	0	0.285667	0
14	32771	15730		0	0.28685	0	0.28319	0	0.300878	0	0.28489	0
14	36772	11783		0	0.299744	0	0.28319	0	0.300878	0	0.28489	0
14	33199	15284		0	0.28685	0	0.28319	0	0.300878	0	0.28489	0
14	30414	19495		0	0.28685	0	0.28319	0	0.300878	0	0.28489	0
14	36684	19513		0	0.28685	0	0.28319	0	0.300878	0	0.28489	0
41	4905	1		0	0.294022	0	0.285433	0	0.289753	0	0.285102	0
41	4502	1		0	0.294022	0	0.285471	0	0.289753	0	0.285106	0
41	4254	1		0	0.294022	0	0.285496	0	0.289753	0	0.285109	0
41	4298	0		0	0.294022	0	0.285491	0	0.289753	0	0.285108	0
41	4605	0		0	0.294022	0	0.285461	0	0.289753	0	0.285105	0
36	9595	9		0	0.297842	0	0.291927	0	0.287833	0	0.286002	0
36	9990	3		0	0.297842	0	0.291814	0	0.287833	0	0.285985	0
36	9015	6		0	0.297842	0	0.292099	0	0.287833	0	0.286026	0
36	9833	0		0	0.297842	0	0.291859	0	0.287833	0	0.285992	0
36	9141	7		0	0.297842	0	0.292061	0	0.287833	0	0.286021	0
9	28108	6919		0	0.294666	0	0.28319	0	0.292774	0	0.28489	0
9	29657	6097		0	0.29292	0	0.28319	0	0.291019	0	0.28489	0
9	28291	6092		0	0.292909	0	0.28319	0	0.291008	0	0.28489	0
9	28811	6702		0	0.294206	0	0.28319	0	0.292312	0	0.28489	0
9	25703	6127		0	0.347911	0	0.329285	0	0.340301	0	0.330873	0
60	692	7526		0	0.295977	0	0.28319	0	0.294092	0	0.28489	0
60	660	7896		0	0.29676	0	0.28319	0	0.294879	0	0.28489	0
60	638	7734		0	0.296415	0	0.28319	0	0.294532	0	0.28489	0
60	605	7597		0	0.296126	0	0.28319	0	0.294242	0	0.28489	0
60	654	7855		0	0.296672	0	0.28319	0	0.294791	0	0.28489	0
60	3723	3868		0	0.288248	0	0.28319	0	0.287096	0	0.28489	0
60	3410	3176		0	0.286823	0	0.28319	0	0.286965	0	0.28489	0
60	3520	3395		0	0.287282	0	0.28319	0	0.286965	0	0.28489	0
60	3270	3402		0	0.287297	0	0.28319	0	0.286965	0	0.28489	0
60	3723	3522		0	0.28754	0	0.28319	0	0.286965	0	0.28489	0
60	95905	78043		0	0.303786	0	0.28319	0	0.301942	0	0.28489	0
60	90655	76713		0	0.296509	0	0.28319	0	0.294627	0	0.28489	0
60	92380	74181		0	0.298876	0	0.28319	0	0.297007	0	0.28489	0
60	91400	73601		0	0.297534	0	0.28319	0	0.295658	0	0.28489	0
60	98036	71136		0	0.300873	0	0.28319	0	0.299015	0	0.28489	0
9	6333	23461		0	0.346589	0	0.34455	0	0.343961	0	0.351015	0
9	6798	22703		0	0.353854	0	0.349303	0	0.351797	0	0.356773	0
9	6600	22385		0	0.356864	0	0.352562	0	0.355038	0	0.360709	0
9	6098	28464		0	0.295484	0	0.297283	0	0.290035	0	0.293928	0
9	6745	25656		0	0.324809	0	0.324483	0	0.320362	0	0.326523	0
56	2101	2175		0	0.293261	0	0.283193	0	0.310378	0	0.28489	0
56	2238	2927		0	0.293261	0	0.283193	0	0.310378	0	0.28489	0
56	2836	2889		0	0.293261	0	0.283193	0	0.310378	0	0.28489	0
56	2914	2983		0	0.293261	0	0.283193	0	0.310378	0	0.28489	0
56	2114	2693		0	0.293261	0	0.283193	0	0.310378	0	0.28489	0
60	8	8		0	0.28319	0	0.28319	0	0.286965	0	0.28489	0
60	0	5		0	0.28319	0	0.28319	0	0.286965	0	0.28489	0
60	8	2		0	0.28319	0	0.28319	0	0.286965	0	0.28489	0
60	3	9		0	0.28319	0	0.28319	0	0.286965	0	0.28489	0
60	3	8		0	0.28319	0	0.28319	0	0.286965	0	0.28489	0
61	853	0		0	0.28319	0	0.28319	0	0.28314	0	0.28489	0
61	823	1		0	0.28319	0	0.28319	0	0.28314	0	0.28489	0
61	845	8		0	0.28319	0	0.28319	0	0.28314	0	0.28489	0
61	824	7		0	0.28319	0	0.28319	0	0.28314	0	0.28489	0
61	885	1		0	0.28319	0	0.28319	0	0.28314	0	0.28489	0
12	3057	3815		0	0.637841	1	0.615583	1	0.632315	1	0.644187	1
12	3679	3863		0	0.636876	1	0.600957	1	0.631411	1	0.634668	1
12	3707	3167		0	0.650881	1	0.613863	1	0.644815	1	0.65007	1
12	3948	3327		0	0.647682	1	0.60553	1	0.641704	1	0.642845	1
12	3957	3773		0	0.638686	1	0.596897	1	0.633109	1	0.632725	1
26	36794	27394		0	0.329588	0	0.28319	0	0.338828	0	0.28489	0
26	39231	21742		0	0.329588	0	0.28319	0	0.338828	0	0.28489	0
26	30867	25527		0	0.329588	0	0.28319	0	0.338828	0	0.28489	0
26	35116	26926		0	0.329588	0	0.28319	0	0.338828	0	0.28489	0
26	35967	20234		0	0.329588	0	0.28319	0	0.338828	0	0.28489	0
13	915	2523		0	0.663817	1	0.651988	1	0.651532	1	0.676601	1
13	958	2259		0	0.668983	1	0.657851	1	0.657249	1	0.684708	1
13	962	2079		0	0.672117	1	0.661664	1	0.661225	1	0.690431	1
13	928	2045		0	0.672713	1	0.662393	1	0.661983	1	0.691531	1
13	915	2074		0	0.672205	1	0.661771	1	0.661336	1	0.690593	1
32	8390	1420		0	0.487387	0	0.333401	0	0.381765	0	0.324428	0
32	8828	1027		0	0.487387	0	0.340758	0	0.381765	0	0.337405	0
32	8480	1364		0	0.487387	0	0.333967	0	0.381765	0	0.324451	0
32	8237	1433		0	0.487387	0	0.333383	0	0.381765	0	0.324427	0
32	8772	1491		0	0.487387	0	0.333383	0	0.381765	0	0.324427	0
36	176010	17		0	0.289549	0	0.28319	0	0.28667	0	0.28489	0
36	417562	13		0	0.289549	0	0.28319	0	0.28667	0	0.28489	0
36	219830	17		0	0.289549	0	0.28319	0	0.28667	0	0.28489	0
36	517417	14		0	0.289549	0	0.28319	0	0.28667	0	0.28489	0
36	185497	15		0	0.289549	0	0.28319	0	0.28667	0	0.28489	0
61	36570	16444		0	0.28319	0	0.28319	0	0.28314	0	0.28489	0
61	35023	14544		0	0.289508	0	0.28319	0	0.28759	0	0.28489	0
61	33875	10138		0	0.301636	0	0.28319	0	0.299781	0	0.28489	0
61	33722	12495		0	0.297054	0	0.28319	0	0.295175	0	0.28489	0
61	38701	16550		0	0.28319	0	0.28319	0	0.28314	0	0.28489	0
27	21920	10060		0	0.5	0	0.389754	0	0.5	0	0.436624	0
27	25063	11959		0	0.5	0	0.389754	0	0.5	0	0.436624	0
27	22214	17587		0	0.5	0	0.389754	0	0.5	0	0.436624	0
27	24905	13192		0	0.5	0	0.389754	0	0.5	0	0.436624	0
27	24291	13522		0	0.5	0	0.389754	0	0.5	0	0.436624	0
57	269	327		0	0.288873	0	0.283192	0	0.303998	0	0.28489	0
57	241	338		0	0.288873	0	0.283192	0	0.303998	0	0.28489	0
57	260	385		0	0.288873	0	0.283192	0	0.303998	0	0.28489	0
57	260	320		0	0.288873	0	0.283192	0	0.303998	0	0.28489	0
57	284	313		0	0.288873	0	0.283192	0	0.303998	0	0.28489	0
60	723	2320		0	0.285074	0	0.28319	0	0.286965	0	0.28489	0
60	712	2170		0	0.284764	0	0.28319	0	0.286965	0	0.28489	0
60	755	2853		0	0.286156	0	0.28319	0	0.286965	0	0.28489	0
60	754	2354		0	0.285145	0	0.28319	0	0.286965	0	0.28489	0
60	709	2530		0	0.285501	0	0.28319	0	0.286965	0	0.28489	0
29	2375	1436		0	0.555511	1	0.549885	1	0.5	1	0.514338	1
29	2775	1624		0	0.543795	1	0.527346	1	0.5	1	0.50923	1
29	2829	1911		0	0.52719	1	0.507699	1	0.5	1	0.507402	1
29	2853	1770		0	0.535165	1	0.513361	1	0.5	1	0.506662	1
29	2465	1871		0	0.529418	1	0.522133	1	0.5	1	0.514338	1
36	509569	2		0	0.289549	0	0.28319	0	0.28667	0	0.28489	0
36	804957	0		0	0.289549	0	0.28319	0	0.28667	0	0.28489	0
36	403914	9		0	0.289549	0	0.28319	0	0.28667	0	0.28489	0
36	236962	1		0	0.289549	0	0.28319	0	0.28667	0	0.28489	0
36	661541	2		0	0.289549	0	0.28319	0	0.28667	0	0.28489	0
60	2927	51		0	0.28319	0	0.28319	0	0.286965	0	0.28489	0
60	2876	57		0	0.28319	0	0.28319	0	0.286965	0	0.28489	0
60	2088	53		0	0.28319	0	0.28319	0	0.286965	0	0.28489	0
60	2282	56		0	0.28319	0	0.28319	0	0.286965	0	0.28489	0
60	2054	50		0	0.28319	0	0.28319	0	0.286965	0	0.28489	0
36	231904	5		0	0.289549	0	0.28319	0	0.28667	0	0.28489	0
36	336496	7		0	0.289549	0	0.28319	0	0.28667	0	0.28489	0
36	684784	6		0	0.289549	0	0.28319	0	0.28667	0	0.28489	0
36	170926	9		0	0.289549	0	0.28319	0	0.28667	0	0.28489	0
36	829915	9		0	0.289549	0	0.28319	0	0.28667	0	0.28489	0
61	116	34		0	0.28319	0	0.28319	0	0.28314	0	0.28489	0
61	114	32		0	0.28319	0	0.28319	0	0.28314	0	0.28489	0
61	160	32		0	0.28319	0	0.28319	0	0.28314	0	0.28489	0
61	182	35		0	0.28319	0	0.28319	0	0.28314	0	0.28489	0
61	138	38		0	0.28319	0	0.28319	0	0.28314	0	0.28489	0
36	4195	0		0	0.297842	0	0.293836	0	0.287833	0	0.286286	0
36	4082	4		0	0.297842	0	0.293884	0	0.287833	0	0.286293	0
36	4727	4		0	0.297842	0	0.293611	0	0.287833	0	0.286251	0
36	4521	2		0	0.297842	0	0.293697	0	0.287833	0	0.286264	0
36	4516	8		0	0.297842	0	0.293699	0	0.287833	0	0.286265	0
60	956	332		0	0.28319	0	0.28319	0	0.286965	0	0.28489	0
60	977	320		0	0.28319	0	0.28319	0	0.286965	0	0.28489	0
60	984	386		0	0.28319	0	0.28319	0	0.286965	0	0.28489	0
60	947	336		0	0.28319	0	0.28319	0	0.286965	0	0.28489	0
60	902	332		0	0.28319	0	0.28319	0	0.286965	0	0.28489	0
32	7883	9		0	0.487387	0	0.383577	0	0.381765	0	0.354345	0
32	7486	8		0	0.487387	0	0.383577	0	0.381765	0	0.354345	0
32	7764	2		0	0.487387	0	0.383577	0	0.381765	0	0.354345	0
32	7670	8		0	0.487387	0	0.383577	0	0.381765	0	0.354345	0
32	7808	1		0	0.487387	0	0.383577	0	0.381765	0	0.354345	0
12	2491	8		0	0.708979	1	0.709556	1	0.700841	1	0.749556	1
12	2487	1		0	0.708979	1	0.709556	1	0.700841	1	0.749556	1
12	2581	0		0	0.708979	1	0.709556	1	0.700841	1	0.749556	1
12	2911	2		0	0.706424	1	0.7059	1	0.699319	1	0.746758	1
12	2753	2		0	0.708335	1	0.708632	1	0.700457	1	0.748847	1
27	438528	588		0	0.332527	0	0.28319	0	0.340094	0	0.28489	0
27	611807	565		0	0.332527	0	0.28319	0	0.340094	0	0.28489	0
27	702128	512		0	0.332527	0	0.28319	0	0.340094	0	0.28489	0
27	914487	500		0	0.332527	0	0.28319	0	0.340094	0	0.28489	0
27	801486	517		0	0.332527	0	0.28319	0	0.340094	0	0.28489	0
60	2847	1		0	0.28319	0	0.28319	0	0.286965	0	0.28489	0
60	2158	7		0	0.28319	0	0.28319	0	0.286965	0	0.28489	0
60	2952	4		0	0.28319	0	0.28319	0	0.286965	0	0.28489	0
60	2663	2		0	0.28319	0	0.28319	0	0.286965	0	0.28489	0
60	2877	5		0	0.28319	0	0.28319	0	0.286965	0	0.28489	0
15	22011	1665		0	0.510373	1	0.481572	0	0.5	0	0.491112	0
15	25386	1316		0	0.358884	0	0.358594	0	0.389529	0	0.399302	0
15	23846	1335		0	0.436377	0	0.426215	0	0.47791	0	0.48816	0
15	27960	1496		0	0.289238	0	0.28319	0	0.305166	0	0.28489	0
15	21618	1613		0	0.519538	1	0.489591	0	0.5	0	0.492219	0
5	15937	18541		0	0.391241	0	0.355217	0	0.384288	0	0.360903	0
5	15884	13437		0	0.454976	0	0.382318	0	0.453273	0	0.392731	0
5	14142	18737		0	0.389585	0	0.356685	0	0.382566	0	0.362461	0
5	10783	18221		0	0.393947	0	0.366732	0	0.387101	0	0.37361	0
5	17274	11920		0	0.480978	0	0.388505	0	0.480236	0	0.399754	0
36	6675	1		0	0.297842	0	0.292865	0	0.287833	0	0.286139	0
36	6511	7		0	0.297842	0	0.292924	0	0.287833	0	0.286148	0
36	6564	9		0	0.297842	0	0.292905	0	0.287833	0	0.286145	0
36	6094	9		0	0.297842	0	0.293076	0	0.287833	0	0.28617	0
36	6470	4		0	0.297842	0	0.292939	0	0.287833	0	0.28615	0
12	3687	6		1	0.697202	1	0.692978	1	0.693849	1	0.737022	1
12	3564	7		1	0.698662	1	0.694973	1	0.694712	1	0.73851	1
12	2623	5		1	0.708979	1	0.709556	1	0.700841	1	0.749556	1
12	2075	6		1	0.708979	1	0.709556	1	0.700841	1	0.749556	1
12	2299	7		1	0.708979	1	0.709556	1	0.700841	1	0.749556	1
12	2883	2		1	0.706761	1	0.706382	1	0.69952	1	0.747125	1
12	2733	2		1	0.708578	1	0.70898	1	0.700602	1	0.749114	1
15	1595	2		1	0.704108	1	0.709556	1	0.689908	1	0.749556	1
15	1803	8		1	0.704108	1	0.709556	1	0.689908	1	0.749556	1
15	1227	3		1	0.704108	1	0.709556	1	0.689908	1	0.749556	1
15	1862	1		1	0.704108	1	0.709556	1	0.689908	1	0.749556	1
15	1894	7		1	0.704108	1	0.709556	1	0.689908	1	0.749556	1
8	9983	27		1	0.629347	1	0.612378	1	0.633684	1	0.647745	1
8	9365	22		1	0.63557	1	0.61887	1	0.640256	1	0.65528	1
8	9275	26		1	0.636484	1	0.619837	1	0.641222	1	0.656404	1
8	9327	20		1	0.635955	1	0.619277	1	0.640663	1	0.655754	1
8	9887	29		1	0.63031	1	0.613369	1	0.634701	1	0.648895	1
9	1194	6		1	0.709556	1	0.709556	1	0.709077	1	0.749556	1
9	1958	8		1	0.709556	1	0.709556	1	0.709077	1	0.749556	1
9	1953	4		1	0.709556	1	0.709556	1	0.709077	1	0.749556	1
9	1906	7		1	0.709556	1	0.709556	1	0.709077	1	0.749556	1
9	1381	8		1	0.709556	1	0.709556	1	0.709077	1	0.749556	1
12	2487	10		1	0.708979	1	0.709556	1	0.700841	1	0.749556	1
12	2441	14		1	0.708979	1	0.709556	1	0.700841	1	0.749556	1
12	2337	18		1	0.708979	1	0.709556	1	0.700841	1	0.749556	1
12	2054	10		1	0.708979	1	0.709556	1	0.700841	1	0.749556	1
12	2692	15		1	0.708979	1	0.709556	1	0.700841	1	0.749556	1
12	2884	8		1	0.706749	1	0.706364	1	0.699513	1	0.747112	1
12	2926	0		1	0.706243	1	0.705643	1	0.699211	1	0.746561	1
12	2945	1		1	0.706014	1	0.705317	1	0.699075	1	0.746313	1
12	2517	9		1	0.708979	1	0.709556	1	0.700841	1	0.749556	1
12	2178	2		1	0.708979	1	0.709556	1	0.700841	1	0.749556	1
12	1441	18		1	0.708979	1	0.709556	1	0.700841	1	0.749556	1
12	1640	11		1	0.708979	1	0.709556	1	0.700841	1	0.749556	1
12	1220	19		1	0.708979	1	0.709556	1	0.700841	1	0.749556	1
12	1049	14		1	0.708979	1	0.709556	1	0.700841	1	0.749556	1
12	1210	11		1	0.708979	1	0.709556	1	0.700841	1	0.749556	1
12	3892	35		1	0.694769	1	0.689695	1	0.692412	1	0.734587	1
12	3845	37		1	0.695325	1	0.690443	1	0.69274	1	0.73514	1
12	3597	33		1	0.698275	1	0.694436	1	0.694483	1	0.738109	1
12	3417	32		1	0.70039	1	0.697384	1	0.695736	1	0.740314	1
12	3557	36		1	0.698744	1	0.695088	1	0.694761	1	0.738595	1
12	2073	36		1	0.708979	1	0.709556	1	0.700841	1	0.749556	1
12	2684	32		1	0.708979	1	0.709556	1	0.700841	1	0.749556	1
12	2573	33		1	0.708979	1	0.709556	1	0.700841	1	0.749556	1
12	2430	37		1	0.708979	1	0.709556	1	0.700841	1	0.749556	1
12	2486	31		1	0.708979	1	0.709556	1	0.700841	1	0.749556	1
12	2135	31		1	0.708979	1	0.709556	1	0.700841	1	0.749556	1
12	2571	33		1	0.708979	1	0.709556	1	0.700841	1	0.749556	1
12	2623	37		1	0.708979	1	0.709556	1	0.700841	1	0.749556	1
12	2697	32		1	0.708979	1	0.709556	1	0.700841	1	0.749556	1
12	2415	37		1	0.708979	1	0.709556	1	0.700841	1	0.749556	1
12	1636	24		1	0.708979	1	0.709556	1	0.700841	1	0.749556	1
12	1747	24		1	0.708979	1	0.709556	1	0.700841	1	0.749556	1
12	1903	20		1	0.708979	1	0.709556	1	0.700841	1	0.749556	1
12	1999	23		1	0.708979	1	0.709556	1	0.700841	1	0.749556	1
12	1977	29		1	0.708979	1	0.709556	1	0.700841	1	0.749556	1
12	3205	48		1	0.702902	1	0.70091	1	0.697226	1	0.742969	1
12	3577	49		1	0.698509	1	0.694762	1	0.694622	1	0.738352	1
12	3771	45		1	0.696202	1	0.691627	1	0.693258	1	0.736018	1
12	3872	40		1	0.695005	1	0.690013	1	0.692551	1	0.734822	1
12	3080	48		1	0.704394	1	0.703017	1	0.698112	1	0.744565	1
12	1195	13		1	0.708979	1	0.709556	1	0.700841	1	0.749556	1
12	1442	18		1	0.708979	1	0.709556	1	0.700841	1	0.749556	1
12	1318	12		1	0.708979	1	0.709556	1	0.700841	1	0.749556	1
12	1644	16		1	0.708979	1	0.709556	1	0.700841	1	0.749556	1
12	1741	18		1	0.708979	1	0.709556	1	0.700841	1	0.749556	1
12	2506	4		1	0.708979	1	0.709556	1	0.700841	1	0.749556	1
12	2422	0		1	0.708979	1	0.709556	1	0.700841	1	0.749556	1
12	2654	8		1	0.708979	1	0.709556	1	0.700841	1	0.749556	1
12	2720	3		1	0.708736	1	0.709207	1	0.700696	1	0.749288	1
12	2666	3		1	0.708979	1	0.709556	1	0.700841	1	0.749556	1
12	2988	6		1	0.705497	1	0.704582	1	0.698768	1	0.745753	1
12	2086	2		1	0.708979	1	0.709556	1	0.700841	1	0.749556	1
12	2900	6		1	0.706556	1	0.706089	1	0.699398	1	0.746902	1
12	2238	8		1	0.708979	1	0.709556	1	0.700841	1	0.749556	1
12	2809	3		1	0.707656	1	0.707659	1	0.700053	1	0.748102	1
12	2247	11		1	0.708979	1	0.709556	1	0.700841	1	0.749556	1
12	2112	11		1	0.708979	1	0.709556	1	0.700841	1	0.749556	1
12	2602	13		1	0.708979	1	0.709556	1	0.700841	1	0.749556	1
12	2969	10		1	0.705725	1	0.704906	1	0.698904	1	0.746	1
12	2745	17		1	0.708432	1	0.708771	1	0.700515	1	0.748953	1
9	2470	10		1	0.709556	1	0.709556	1	0.709077	1	0.749556	1
9	2438	15		1	0.709556	1	0.709556	1	0.709077	1	0.749556	1
9	2779	13		1	0.708604	1	0.708195	1	0.708577	1	0.748739	1
9	2109	13		1	0.709556	1	0.709556	1	0.709077	1	0.749556	1
9	2694	17		1	0.709556	1	0.709556	1	0.709077	1	0.749556	1
12	3789	6		1	0.695989	1	0.691338	1	0.693132	1	0.735804	1
12	3144	7		1	0.703629	1	0.701935	1	0.697658	1	0.743745	1
12	3314	7		1	0.701608	1	0.699089	1	0.696458	1	0.741597	1
12	3766	6		1	0.696262	1	0.691707	1	0.693293	1	0.736077	1
12	3299	3		1	0.701785	1	0.699339	1	0.696563	1	0.741784	1
13	2647	2		1	0.707891	1	0.709556	1	0.69736	1	0.749556	1
13	2725	5		1	0.707583	1	0.70911	1	0.697167	1	0.749178	1
13	2614	9		1	0.707891	1	0.709556	1	0.69736	1	0.749556	1
13	2976	2		1	0.704502	1	0.704683	1	0.695238	1	0.745447	1
13	2250	5		1	0.707891	1	0.709556	1	0.69736	1	0.749556	1
12	2050	6		1	0.708979	1	0.709556	1	0.700841	1	0.749556	1
12	2882	5		1	0.706774	1	0.706399	1	0.699527	1	0.747138	1
12	2081	2		1	0.708979	1	0.709556	1	0.700841	1	0.749556	1
12	2836	7		1	0.707329	1	0.707192	1	0.699858	1	0.747745	1
12	2696	5		1	0.708979	1	0.709556	1	0.700841	1	0.749556	1
11	1680	32		1	0.70951	1	0.709556	1	0.704014	1	0.749556	1
11	1125	32		1	0.70951	1	0.709556	1	0.704014	1	0.749556	1
11	1619	30		1	0.70951	1	0.709556	1	0.704014	1	0.749556	1
11	1687	35		1	0.70951	1	0.709556	1	0.704014	1	0.749556	1
11	1760	37		1	0.70951	1	0.709556	1	0.704014	1	0.749556	1
13	20868	6		1	0.534305	1	0.52531	1	0.500754	1	0.517223	1
13	25078	4		1	0.37352	0	0.384261	0	0.388922	0	0.413158	0
13	27761	0		1	0.285033	0	0.28319	0	0.296725	0	0.28489	0
13	25032	6		1	0.37604	0	0.386737	0	0.391604	0	0.416196	0
13	20585	4		1	0.536237	1	0.526951	1	0.50258	1	0.517926	1
13	1731	6		1	0.707891	1	0.709556	1	0.69736	1	0.749556	1
13	1987	4		1	0.707891	1	0.709556	1	0.69736	1	0.749556	1
13	1402	4		1	0.707891	1	0.709556	1	0.69736	1	0.749556	1
13	1884	3		1	0.707891	1	0.709556	1	0.69736	1	0.749556	1
13	1190	1		1	0.707891	1	0.709556	1	0.69736	1	0.749556	1
14	1114	0		1	0.706246	1	0.709556	1	0.693697	1	0.749556	1
14	1434	9		1	0.706246	1	0.709556	1	0.693697	1	0.749556	1
14	1844	7		1	0.706246	1	0.709556	1	0.693697	1	0.749556	1
14	1629	9		1	0.706246	1	0.709556	1	0.693697	1	0.749556	1
14	1820	3		1	0.706246	1	0.709556	1	0.693697	1	0.749556	1
28	2968	3		1	0.649846	1	0.683442	1	0.634643	1	0.634875	1
28	2126	3		1	0.663311	1	0.708716	1	0.65743	1	0.742922	1
28	2371	8		1	0.663311	1	0.708716	1	0.65743	1	0.742922	1
28	2273	7		1	0.663311	1	0.708716	1	0.65743	1	0.742922	1
28	2129	6		1	0.663311	1	0.708716	1	0.65743	1	0.742922	1
29	227	117		1	0.658938	1	0.695708	1	0.649666	1	0.660977	1
29	207	155		1	0.655735	1	0.688515	1	0.643687	1	0.63617	1
29	214	166		1	0.654677	1	0.686714	1	0.641758	1	0.631135	1
29	232	154		1	0.655831	1	0.688679	1	0.643864	1	0.63665	1
29	255	187		1	0.65267	1	0.683319	1	0.638144	1	0.622616	1
28	3533	3725		1	0.5	0	0.461665	0	0.5	1	0.496676	0
28	3431	3727		1	0.5	0	0.46522	0	0.5	1	0.497975	0
28	3891	3806		1	0.5	0	0.450215	0	0.5	1	0.493144	0
28	3152	3692		1	0.5	0	0.47571	0	0.5	1	0.502566	1
28	3508	3542		1	0.5	0	0.462523	0	0.5	1	0.49698	0
29	7318	19577		1	0.5	1	0.388453	0	0.5	1	0.446748	0
29	7300	14484		1	0.5	1	0.388453	0	0.5	1	0.446748	0
29	7463	10691		1	0.5	1	0.388453	0	0.5	1	0.446748	0
29	7822	11911		1	0.5	1	0.388453	0	0.5	1	0.446748	0
29	7449	15571		1	0.5	1	0.388453	0	0.5	1	0.446748	0
28	99932	78329		1	0.335109	0	0.28319	0	0.340911	0	0.28489	0
28	95131	72539		1	0.335109	0	0.28319	0	0.340911	0	0.28489	0
28	93829	71702		1	0.335109	0	0.28319	0	0.340911	0	0.28489	0
28	95460	74714		1	0.335109	0	0.28319	0	0.340911	0	0.28489	0
28	90740	72316		1	0.335109	0	0.28319	0	0.340911	0	0.28489	0
28	2325	2		1	0.663311	1	0.708716	1	0.65743	1	0.742922	1
28	2578	6		1	0.663311	1	0.708716	1	0.65743	1	0.742922	1
28	2897	3		1	0.65346	1	0.689638	1	0.640487	1	0.651361	1
28	2890	6		1	0.653819	1	0.690259	1	0.64108	1	0.65324	1
28	2303	5		1	0.663311	1	0.708716	1	0.65743	1	0.742922	1
28	3359	3002		1	0.5	0	0.467816	0	0.5	1	0.498998	0
28	3991	3760		1	0.5	0	0.447275	0	0.5	1	0.480016	0
28	3325	3426		1	0.5	0	0.469068	0	0.5	1	0.499515	0
28	3892	3130		1	0.5	0	0.450185	0	0.5	1	0.493136	0
28	3369	3851		1	0.5	0	0.467451	0	0.5	1	0.49885	0
29	8389	23168		1	0.5	1	0.388453	0	0.5	1	0.446748	0
29	8044	27609		1	0.431009	0	0.352006	0	0.491416	0	0.446748	0
29	8024	26489		1	0.471002	0	0.374193	0	0.5	1	0.446748	0
29	8871	28229		1	0.405477	0	0.335872	0	0.430727	0	0.454326	0
29	8905	28515		1	0.392608	0	0.327149	0	0.424537	0	0.449204	0
28	1257	9774		1	0.5	0	0.495953	0	0.5	1	0.516782	1
28	1875	9850		1	0.5	0	0.495953	0	0.5	1	0.516782	1
28	1746	9668		1	0.5	0	0.495953	0	0.5	1	0.516782	1
28	1266	9276		1	0.5	0	0.495953	0	0.5	1	0.516782	1
28	1363	9214		1	0.5	0	0.495953	0	0.5	1	0.516782	1
12	2712	6678		1	0.580427	1	0.567281	1	0.582556	1	0.592357	1
12	2645	6973		1	0.574569	1	0.56208	1	0.577152	1	0.587611	1
12	2306	6660		1	0.580783	1	0.567841	1	0.58284	1	0.592788	1
12	2543	6246		1	0.589015	1	0.575581	1	0.589497	1	0.599915	1
12	2797	6450		1	0.584946	1	0.569891	1	0.586188	1	0.595298	1
12	1151	9		1	0.708979	1	0.709556	1	0.700841	1	0.749556	1
12	1775	6		1	0.708979	1	0.709556	1	0.700841	1	0.749556	1
12	1502	3		1	0.708979	1	0.709556	1	0.700841	1	0.749556	1
12	1725	8		1	0.708979	1	0.709556	1	0.700841	1	0.749556	1
12	1781	3		1	0.708979	1	0.709556	1	0.700841	1	0.749556	1
12	2350	1		1	0.708979	1	0.709556	1	0.700841	1	0.749556	1
12	2169	8		1	0.708979	1	0.709556	1	0.700841	1	0.749556	1
12	2647	1		1	0.708979	1	0.709556	1	0.700841	1	0.749556	1
12	2150	3		1	0.708979	1	0.709556	1	0.700841	1	0.749556	1
12	2132	7		1	0.708979	1	0.709556	1	0.700841	1	0.749556	1
13	2148	6		1	0.707891	1	0.709556	1	0.69736	1	0.749556	1
13	2291	6		1	0.707891	1	0.709556	1	0.69736	1	0.749556	1
13	2636	3		1	0.707891	1	0.709556	1	0.69736	1	0.749556	1
13	2449	4		1	0.707891	1	0.709556	1	0.69736	1	0.749556	1
13	2866	2		1	0.705848	1	0.706612	1	0.69608	1	0.747067	1
12	3466	4		1	0.699813	1	0.696577	1	0.695394	1	0.73971	1
12	3788	1		1	0.696001	1	0.691354	1	0.693139	1	0.735815	1
12	3274	3		1	0.702082	1	0.699755	1	0.696739	1	0.742098	1
12	3067	4		1	0.704549	1	0.703237	1	0.698205	1	0.744732	1
12	3984	5		1	0.693684	1	0.688239	1	0.691386	1	0.732914	1
12	1010	4		1	0.708979	1	0.709556	1	0.700841	1	0.749556	1
12	1511	1		1	0.708979	1	0.709556	1	0.700841	1	0.749556	1
12	1145	3		1	0.708979	1	0.709556	1	0.700841	1	0.749556	1
12	1537	2		1	0.708979	1	0.709556	1	0.700841	1	0.749556	1
12	1895	9		1	0.708979	1	0.709556	1	0.700841	1	0.749556	1
29	3968	4469		1	0.5	1	0.437545	0	0.5	1	0.482773	0
29	3423	4473		1	0.5	1	0.45677	0	0.5	1	0.496346	0
29	3498	4339		1	0.5	1	0.453845	0	0.5	1	0.495567	0
29	3786	4627		1	0.5	1	0.443473	0	0.5	1	0.493375	0
29	3584	4125		1	0.5	1	0.45061	0	0.5	1	0.494763	0
4	9369	2		1	0.635529	1	0.618827	1	0.643285	1	0.658139	1
4	9317	7		1	0.636057	1	0.619385	1	0.643825	1	0.658766	1
4	9885	0		1	0.63033	1	0.61339	1	0.637885	1	0.65197	1
4	9027	9		1	0.639022	1	0.62253	1	0.646905	1	0.662336	1
4	9630	4		1	0.632899	1	0.616055	1	0.640548	1	0.654989	1
28	2829	18971		1	0.5	0	0.489472	0	0.5	1	0.511139	1
28	2660	19529		1	0.5	0	0.495953	0	0.5	1	0.516782	1
28	2355	14309		1	0.5	0	0.495953	0	0.5	1	0.516782	1
28	2081	19217		1	0.5	0	0.495953	0	0.5	1	0.516782	1
28	2600	15602		1	0.5	0	0.495953	0	0.5	1	0.516782	1
10	38087	18669		1	0.28319	0	0.28319	0	0.286167	0	0.28489	0
10	37954	18787		1	0.28319	0	0.28319	0	0.286167	0	0.28489	0
10	31122	18911		1	0.28319	0	0.28319	0	0.286167	0	0.28489	0
10	35010	16370		1	0.28319	0	0.28319	0	0.286167	0	0.28489	0
10	30697	17008		1	0.28319	0	0.28319	0	0.286167	0	0.28489	0
25	3634	242		1	0.64291	1	0.643261	1	0.624868	1	0.607979	1
25	3546	260		1	0.645469	1	0.644606	1	0.627916	1	0.609322	1
25	3129	208		1	0.657877	1	0.669581	1	0.643435	1	0.64103	1
25	3495	221		1	0.646954	1	0.651629	1	0.629706	1	0.616847	1
25	3500	236		1	0.646808	1	0.649505	1	0.629529	1	0.614476	1
10	14935	575		1	0.583606	1	0.557307	1	0.576033	1	0.5805	1
10	17418	507		1	0.563433	1	0.541958	1	0.554519	1	0.561025	1
10	14691	501		1	0.585689	1	0.560699	1	0.578269	1	0.58358	1
10	18872	558		1	0.552469	1	0.532104	1	0.542928	1	0.549859	1
10	13592	585		1	0.595282	1	0.567015	1	0.588594	1	0.592586	1
15	5587	209		1	0.668049	1	0.655001	1	0.649972	1	0.674967	1
15	5495	231		1	0.669147	1	0.65537	1	0.651514	1	0.676444	1
15	5957	218		1	0.663603	1	0.649259	1	0.64376	1	0.665623	1
15	5891	210		1	0.664392	1	0.650548	1	0.64486	1	0.667486	1
15	5723	228		1	0.666413	1	0.652178	1	0.647681	1	0.670902	1
11	2396	3		1	0.70951	1	0.709556	1	0.704014	1	0.749556	1
11	2415	8		1	0.70951	1	0.709556	1	0.704014	1	0.749556	1
11	2305	4		1	0.70951	1	0.709556	1	0.704014	1	0.749556	1
11	2478	6		1	0.70951	1	0.709556	1	0.704014	1	0.749556	1
11	2304	6		1	0.70951	1	0.709556	1	0.704014	1	0.749556	1
12	1339	2		1	0.708979	1	0.709556	1	0.700841	1	0.749556	1
12	1027	3		1	0.708979	1	0.709556	1	0.700841	1	0.749556	1
12	1229	5		1	0.708979	1	0.709556	1	0.700841	1	0.749556	1
12	1642	8		1	0.708979	1	0.709556	1	0.700841	1	0.749556	1
12	1544	7		1	0.708979	1	0.709556	1	0.700841	1	0.749556	1
13	4937	3		1	0.681146	1	0.673029	1	0.672765	1	0.707771	1
13	4963	5		1	0.680842	1	0.672641	1	0.672375	1	0.707173	1
13	4013	5		1	0.692021	1	0.68733	1	0.686833	1	0.730213	1
13	4037	4		1	0.691735	1	0.686945	1	0.68646	1	0.7296	1
13	4954	5		1	0.680947	1	0.672775	1	0.67251	1	0.70738	1
12	1039	3		1	0.708979	1	0.709556	1	0.700841	1	0.749556	1
12	1937	6		1	0.708979	1	0.709556	1	0.700841	1	0.749556	1
12	1118	0		1	0.708979	1	0.709556	1	0.700841	1	0.749556	1
12	1523	0		1	0.708979	1	0.709556	1	0.700841	1	0.749556	1
12	1782	0		1	0.708979	1	0.709556	1	0.700841	1	0.749556	1
12	1819	6		1	0.708979	1	0.709556	1	0.700841	1	0.749556	1
12	1177	0		1	0.708979	1	0.709556	1	0.700841	1	0.749556	1
12	1113	9		1	0.708979	1	0.709556	1	0.700841	1	0.749556	1
12	1453	5		1	0.708979	1	0.709556	1	0.700841	1	0.749556	1
12	1932	8		1	0.708979	1	0.709556	1	0.700841	1	0.749556	1
4	9473	2		1	0.634478	1	0.617717	1	0.642192	1	0.656879	1
4	9512	0		1	0.634085	1	0.617302	1	0.641787	1	0.656411	1
4	9214	4		1	0.637106	1	0.620495	1	0.64492	1	0.660031	1
4	9923	3		1	0.629948	1	0.612997	1	0.637483	1	0.65152	1
4	9165	9		1	0.637606	1	0.621026	1	0.645433	1	0.660628	1
8	1888	26		1	0.709556	1	0.709556	1	0.710833	1	0.749556	1
8	1917	28		1	0.709556	1	0.709556	1	0.710833	1	0.749556	1
8	1644	21		1	0.709556	1	0.709556	1	0.710833	1	0.749556	1
8	1388	29		1	0.709556	1	0.709556	1	0.710833	1	0.749556	1
8	1942	21		1	0.709556	1	0.709556	1	0.710833	1	0.749556	1
12	2616	1		1	0.708979	1	0.709556	1	0.700841	1	0.749556	1
12	2944	8		1	0.706026	1	0.705334	1	0.699083	1	0.746326	1
12	2453	1		1	0.708979	1	0.709556	1	0.700841	1	0.749556	1
12	2282	7		1	0.708979	1	0.709556	1	0.700841	1	0.749556	1
12	2011	6		1	0.708979	1	0.709556	1	0.700841	1	0.749556	1
13	1365	9		1	0.707891	1	0.709556	1	0.69736	1	0.749556	1
13	1994	4		1	0.707891	1	0.709556	1	0.69736	1	0.749556	1
13	1152	9		1	0.707891	1	0.709556	1	0.69736	1	0.749556	1
13	1832	0		1	0.707891	1	0.709556	1	0.69736	1	0.749556	1
13	1273	6		1	0.707891	1	0.709556	1	0.69736	1	0.749556	1
12	2121	8		1	0.708979	1	0.709556	1	0.700841	1	0.749556	1
12	2605	3		1	0.708979	1	0.709556	1	0.700841	1	0.749556	1
12	2660	6		1	0.708979	1	0.709556	1	0.700841	1	0.749556	1
12	2360	3		1	0.708979	1	0.709556	1	0.700841	1	0.749556	1
12	2266	8		1	0.708979	1	0.709556	1	0.700841	1	0.749556	1
12	2982	9		1	0.705569	1	0.704684	1	0.698811	1	0.745831	1
12	2816	5		1	0.707571	1	0.707538	1	0.700002	1	0.748009	1
12	2436	9		1	0.708979	1	0.709556	1	0.700841	1	0.749556	1
12	2572	7		1	0.708979	1	0.709556	1	0.700841	1	0.749556	1
12	2971	9		1	0.705701	1	0.704872	1	0.698889	1	0.745974	1
12	2661	1		1	0.708979	1	0.709556	1	0.700841	1	0.749556	1
12	2158	9		1	0.708979	1	0.709556	1	0.700841	1	0.749556	1
12	2862	8		1	0.707015	1	0.706743	1	0.699671	1	0.747401	1
12	2407	8		1	0.708979	1	0.709556	1	0.700841	1	0.749556	1
12	2801	4		1	0.707753	1	0.707798	1	0.70011	1	0.748208	1
4	9361	3		1	0.63561	1	0.618913	1	0.643368	1	0.658235	1
4	9324	0		1	0.635986	1	0.619309	1	0.643763	1	0.65869	1
4	9956	9		1	0.629617	1	0.612656	1	0.637128	1	0.651124	1
4	9090	6		1	0.638375	1	0.621842	1	0.646237	1	0.661558	1
4	9753	8		1	0.631662	1	0.614764	1	0.639255	1	0.653518	1
13	1151	8		1	0.707891	1	0.709556	1	0.69736	1	0.749556	1
13	1229	1		1	0.707891	1	0.709556	1	0.69736	1	0.749556	1
13	1835	1		1	0.707891	1	0.709556	1	0.69736	1	0.749556	1
13	1782	2		1	0.707891	1	0.709556	1	0.69736	1	0.749556	1
13	1699	5		1	0.707891	1	0.709556	1	0.69736	1	0.749556	1
12	3718	5		1	0.696833	1	0.692478	1	0.693631	1	0.73665	1
12	3041	8		1	0.704861	1	0.703679	1	0.69839	1	0.745067	1
12	3764	8		1	0.696286	1	0.691739	1	0.693308	1	0.736101	1
12	3183	1		1	0.703164	1	0.701279	1	0.697381	1	0.743249	1
12	3596	7		1	0.698287	1	0.694452	1	0.69449	1	0.738121	1
4	9206	4		1	0.637187	1	0.620582	1	0.645005	1	0.66013	1
4	9210	1		1	0.637147	1	0.620538	1	0.644968	1	0.660085	1
4	9942	8		1	0.629758	1	0.6128	1	0.637276	1	0.651289	1
4	9666	8		1	0.632539	1	0.615676	1	0.640167	1	0.654553	1
4	9089	6		1	0.638385	1	0.621853	1	0.646247	1	0.661571	1
8	1678	12		1	0.709556	1	0.709556	1	0.710833	1	0.749556	1
8	1818	19		1	0.709556	1	0.709556	1	0.710833	1	0.749556	1
8	1376	14		1	0.709556	1	0.709556	1	0.710833	1	0.749556	1
8	1000	11		1	0.709556	1	0.709556	1	0.710833	1	0.749556	1
8	1016	13		1	0.709556	1	0.709556	1	0.710833	1	0.749556	1
12	1194	4		1	0.708979	1	0.709556	1	0.700841	1	0.749556	1
12	1079	2		1	0.708979	1	0.709556	1	0.700841	1	0.749556	1
12	1163	6		1	0.708979	1	0.709556	1	0.700841	1	0.749556	1
12	1632	8		1	0.708979	1	0.709556	1	0.700841	1	0.749556	1
12	1758	1		1	0.708979	1	0.709556	1	0.700841	1	0.749556	1
4	9999	5		1	0.629186	1	0.612213	1	0.636688	1	0.650627	1
4	9786	7		1	0.631328	1	0.61442	1	0.63891	1	0.653129	1
4	9162	8		1	0.637637	1	0.621058	1	0.645466	1	0.660666	1
4	9626	0		1	0.632939	1	0.616097	1	0.640596	1	0.655042	1
4	9326	6		1	0.635966	1	0.619288	1	0.643732	1	0.658658	1
12	4213	7		1	0.691002	1	0.684659	1	0.688066	1	0.727612	1
12	4387	1		1	0.688982	1	0.681981	1	0.685572	1	0.723666	1
12	4033	7		1	0.693108	1	0.687468	1	0.690672	1	0.731769	1
12	4944	9		1	0.682538	1	0.673644	1	0.677647	1	0.711496	1
12	4459	0		1	0.68815	1	0.680884	1	0.684547	1	0.722054	1
12	2328	7		1	0.708979	1	0.709556	1	0.700841	1	0.749556	1
12	2548	9		1	0.708979	1	0.709556	1	0.700841	1	0.749556	1
12	2761	6		1	0.708238	1	0.708492	1	0.700399	1	0.74874	1
12	2151	6		1	0.708979	1	0.709556	1	0.700841	1	0.749556	1
12	2915	3		1	0.706375	1	0.705831	1	0.69929	1	0.746705	1
13	2579	1		1	0.707891	1	0.709556	1	0.69736	1	0.749556	1
13	2209	2		1	0.707891	1	0.709556	1	0.69736	1	0.749556	1
13	2827	0		1	0.706327	1	0.7073	1	0.69638	1	0.747647	1
13	2318	7		1	0.707891	1	0.709556	1	0.69736	1	0.749556	1
13	2442	3		1	0.707891	1	0.709556	1	0.69736	1	0.749556	1
4	9530	2		1	0.633903	1	0.617111	1	0.641595	1	0.656191	1
4	9214	1		1	0.637106	1	0.620495	1	0.644925	1	0.660035	1
4	9183	9		1	0.637422	1	0.620831	1	0.645241	1	0.660406	1
4	9953	6		1	0.629647	1	0.612687	1	0.637165	1	0.651163	1
4	9744	4		1	0.631753	1	0.614858	1	0.639357	1	0.653631	1
12	4149	4		1	0.691749	1	0.685653	1	0.68899	1	0.729081	1
12	4116	0		1	0.692134	1	0.686168	1	0.689467	1	0.729842	1
12	4683	0		1	0.685565	1	0.677507	1	0.681364	1	0.717114	1
12	4855	6		1	0.683566	1	0.674953	1	0.678909	1	0.713395	1
12	4144	9		1	0.691807	1	0.685731	1	0.689062	1	0.729196	1
12	2557	3		1	0.708979	1	0.709556	1	0.700841	1	0.749556	1
12	2548	4		1	0.708979	1	0.709556	1	0.700841	1	0.749556	1
12	2009	3		1	0.708979	1	0.709556	1	0.700841	1	0.749556	1
12	2452	6		1	0.708979	1	0.709556	1	0.700841	1	0.749556	1
12	2336	7		1	0.708979	1	0.709556	1	0.700841	1	0.749556	1
12	2813	9		1	0.707608	1	0.70759	1	0.700024	1	0.748049	1
12	2222	1		1	0.708979	1	0.709556	1	0.700841	1	0.749556	1
12	2151	1		1	0.708979	1	0.709556	1	0.700841	1	0.749556	1
12	2763	4		1	0.708214	1	0.708458	1	0.700385	1	0.748713	1
12	2967	9		1	0.705749	1	0.70494	1	0.698918	1	0.746026	1
12	3279	7		1	0.702023	1	0.699672	1	0.696704	1	0.742036	1
12	3115	3		1	0.703975	1	0.702425	1	0.697863	1	0.744116	1
12	3873	3		1	0.694993	1	0.689997	1	0.692544	1	0.73481	1
12	3669	8		1	0.697417	1	0.693269	1	0.693976	1	0.737239	1
12	3144	9		1	0.703629	1	0.701935	1	0.697658	1	0.743745	1
12	2121	4		1	0.708979	1	0.709556	1	0.700841	1	0.749556	1
12	2732	4		1	0.70859	1	0.708997	1	0.700609	1	0.749127	1
12	2241	7		1	0.708979	1	0.709556	1	0.700841	1	0.749556	1
12	2069	9		1	0.708979	1	0.709556	1	0.700841	1	0.749556	1
12	2354	6		1	0.708979	1	0.709556	1	0.700841	1	0.749556	1
12	1197	0		1	0.708979	1	0.709556	1	0.700841	1	0.749556	1
12	1837	4		1	0.708979	1	0.709556	1	0.700841	1	0.749556	1
12	1298	6		1	0.708979	1	0.709556	1	0.700841	1	0.749556	1
12	1643	3		1	0.708979	1	0.709556	1	0.700841	1	0.749556	1
12	1480	2		1	0.708979	1	0.709556	1	0.700841	1	0.749556	1
12	1079	6		1	0.708979	1	0.709556	1	0.700841	1	0.749556	1
12	1056	2		1	0.708979	1	0.709556	1	0.700841	1	0.749556	1
12	1648	9		1	0.708979	1	0.709556	1	0.700841	1	0.749556	1
12	1118	7		1	0.708979	1	0.709556	1	0.700841	1	0.749556	1
12	1498	3		1	0.708979	1	0.709556	1	0.700841	1	0.749556	1
8	3469	20		1	0.700424	1	0.696668	1	0.70616	1	0.742203	1
8	3019	26		1	0.705731	1	0.704113	1	0.708876	1	0.746448	1
8	3515	24		1	0.699887	1	0.695921	1	0.705885	1	0.741778	1
8	3697	24		1	0.69775	1	0.692995	1	0.704792	1	0.740111	1
8	3074	25		1	0.705077	1	0.703189	1	0.708541	1	0.745921	1
12	2559	9		1	0.708979	1	0.709556	1	0.700841	1	0.749556	1
12	2517	4		1	0.708979	1	0.709556	1	0.700841	1	0.749556	1
12	2292	4		1	0.708979	1	0.709556	1	0.700841	1	0.749556	1
12	2921	6		1	0.706303	1	0.705728	1	0.699247	1	0.746627	1
12	2403	8		1	0.708979	1	0.709556	1	0.700841	1	0.749556	1
12	2634	8		1	0.708979	1	0.709556	1	0.700841	1	0.749556	1
12	2484	7		1	0.708979	1	0.709556	1	0.700841	1	0.749556	1
12	2994	0		1	0.705425	1	0.704479	1	0.698725	1	0.745675	1
12	2658	4		1	0.708979	1	0.709556	1	0.700841	1	0.749556	1
12	2972	0		1	0.705689	1	0.704855	1	0.698882	1	0.745961	1
13	1954	7		1	0.707891	1	0.709556	1	0.69736	1	0.749556	1
13	1024	7		1	0.707891	1	0.709556	1	0.69736	1	0.749556	1
13	1591	3		1	0.707891	1	0.709556	1	0.69736	1	0.749556	1
13	1884	1		1	0.707891	1	0.709556	1	0.69736	1	0.749556	1
13	1581	1		1	0.707891	1	0.709556	1	0.69736	1	0.749556	1
12	3396	6		1	0.700638	1	0.69773	1	0.695883	1	0.740575	1
12	3285	6		1	0.701951	1	0.699572	1	0.696662	1	0.74196	1
12	3649	7		1	0.697656	1	0.693593	1	0.694117	1	0.73748	1
12	3260	0		1	0.702248	1	0.699989	1	0.696838	1	0.742275	1
12	3986	2		1	0.69366	1	0.688208	1	0.691356	1	0.732867	1
15	1469	1		1	0.704108	1	0.709556	1	0.689908	1	0.749556	1
15	1312	8		1	0.704108	1	0.709556	1	0.689908	1	0.749556	1
15	1931	6		1	0.704108	1	0.709556	1	0.689908	1	0.749556	1
15	1877	2		1	0.704108	1	0.709556	1	0.689908	1	0.749556	1
15	1989	7		1	0.704108	1	0.709556	1	0.689908	1	0.749556	1
12	2658	0		1	0.708979	1	0.709556	1	0.700841	1	0.749556	1
12	2301	9		1	0.708979	1	0.709556	1	0.700841	1	0.749556	1
12	2580	5		1	0.708979	1	0.709556	1	0.700841	1	0.749556	1
12	2370	6		1	0.708979	1	0.709556	1	0.700841	1	0.749556	1
12	2169	2		1	0.708979	1	0.709556	1	0.700841	1	0.749556	1
13	2390	7		1	0.707891	1	0.709556	1	0.69736	1	0.749556	1
13	2982	9		1	0.704429	1	0.704579	1	0.695192	1	0.74536	1
13	2979	6		1	0.704466	1	0.704631	1	0.695215	1	0.745403	1
13	2307	3		1	0.707891	1	0.709556	1	0.69736	1	0.749556	1
13	2931	4		1	0.705052	1	0.70547	1	0.695582	1	0.746107	1
12	1434	7		1	0.708979	1	0.709556	1	0.700841	1	0.749556	1
12	1760	1		1	0.708979	1	0.709556	1	0.700841	1	0.749556	1
12	1916	4		1	0.708979	1	0.709556	1	0.700841	1	0.749556	1
12	1501	5		1	0.708979	1	0.709556	1	0.700841	1	0.749556	1
12	1374	8		1	0.708979	1	0.709556	1	0.700841	1	0.749556	1
9	2443	8		1	0.709556	1	0.709556	1	0.709077	1	0.749556	1
9	2877	1		1	0.707427	1	0.706519	1	0.707959	1	0.747733	1
9	2348	6		1	0.709556	1	0.709556	1	0.709077	1	0.749556	1
9	2107	5		1	0.709556	1	0.709556	1	0.709077	1	0.749556	1
9	2764	8		1	0.708784	1	0.708453	1	0.708671	1	0.748893	1
12	2273	3		1	0.708979	1	0.709556	1	0.700841	1	0.749556	1
12	2473	1		1	0.708979	1	0.709556	1	0.700841	1	0.749556	1
12	2960	4		1	0.705834	1	0.70506	1	0.698968	1	0.746118	1
12	2101	3		1	0.708979	1	0.709556	1	0.700841	1	0.749556	1
12	2540	5		1	0.708979	1	0.709556	1	0.700841	1	0.749556	1
12	3625	3		1	0.697943	1	0.693981	1	0.694287	1	0.73777	1
12	3278	9		1	0.702034	1	0.699689	1	0.696711	1	0.742048	1
12	3521	7		1	0.699166	1	0.695676	1	0.695011	1	0.739035	1
12	3330	4		1	0.701418	1	0.698823	1	0.696345	1	0.741396	1
12	3275	8		1	0.70207	1	0.699739	1	0.696732	1	0.742086	1
12	1214	5		1	0.708979	1	0.709556	1	0.700841	1	0.749556	1
12	1666	2		1	0.708979	1	0.709556	1	0.700841	1	0.749556	1
12	1440	7		1	0.708979	1	0.709556	1	0.700841	1	0.749556	1
12	1412	4		1	0.708979	1	0.709556	1	0.700841	1	0.749556	1
12	1846	4		1	0.708979	1	0.709556	1	0.700841	1	0.749556	1
12	1637	8		1	0.708979	1	0.709556	1	0.700841	1	0.749556	1
12	1986	9		1	0.708979	1	0.709556	1	0.700841	1	0.749556	1
12	1629	9		1	0.708979	1	0.709556	1	0.700841	1	0.749556	1
12	1429	1		1	0.708979	1	0.709556	1	0.700841	1	0.749556	1
12	1277	1		1	0.708979	1	0.709556	1	0.700841	1	0.749556	1
12	1809	0		1	0.708979	1	0.709556	1	0.700841	1	0.749556	1
12	1727	5		1	0.708979	1	0.709556	1	0.700841	1	0.749556	1
12	1845	8		1	0.708979	1	0.709556	1	0.700841	1	0.749556	1
12	1615	4		1	0.708979	1	0.709556	1	0.700841	1	0.749556	1
12	1613	3		1	0.708979	1	0.709556	1	0.700841	1	0.749556	1
12	2925	5		1	0.706255	1	0.70566	1	0.699219	1	0.746574	1
12	2402	1		1	0.708979	1	0.709556	1	0.700841	1	0.749556	1
12	2255	9		1	0.708979	1	0.709556	1	0.700841	1	0.749556	1
12	2739	5		1	0.708505	1	0.708875	1	0.700559	1	0.749034	1
12	2405	1		1	0.708979	1	0.709556	1	0.700841	1	0.749556	1
8	2843	8		1	0.707835	1	0.707099	1	0.709952	1	0.748152	1
8	2688	0		1	0.709556	1	0.709556	1	0.710833	1	0.749556	1
8	2162	2		1	0.709556	1	0.709556	1	0.710833	1	0.749556	1
8	2140	0		1	0.709556	1	0.709556	1	0.710833	1	0.749556	1
8	2345	6		1	0.709556	1	0.709556	1	0.710833	1	0.749556	1
9	3343	9		1	0.7019	1	0.698726	1	0.705059	1	0.743067	1
9	3828	2		1	0.696204	1	0.690914	1	0.702074	1	0.738408	1
9	3142	5		1	0.70427	1	0.702052	1	0.706303	1	0.745056	1
9	3087	5		1	0.704923	1	0.702971	1	0.706645	1	0.745607	1
9	3906	6		1	0.695288	1	0.689685	1	0.701594	1	0.737677	1
12	2933	3		1	0.706159	1	0.705523	1	0.699161	1	0.74647	1
12	2638	9		1	0.708979	1	0.709556	1	0.700841	1	0.749556	1
12	2919	4		1	0.706327	1	0.705763	1	0.699262	1	0.746653	1
12	2740	0		1	0.708493	1	0.708858	1	0.700551	1	0.74902	1
12	2378	0		1	0.708979	1	0.709556	1	0.700841	1	0.749556	1
8	3888	25		1	0.695499	1	0.689968	1	0.703641	1	0.738389	1
8	3689	21		1	0.697844	1	0.693123	1	0.70484	1	0.740184	1
8	3762	25		1	0.696982	1	0.69196	1	0.704399	1	0.739522	1
8	3552	29		1	0.699456	1	0.695323	1	0.705665	1	0.741437	1
8	3067	21		1	0.70516	1	0.703306	1	0.708583	1	0.745988	1
12	1310	9		1	0.708979	1	0.709556	1	0.700841	1	0.749556	1
12	1244	3		1	0.708979	1	0.709556	1	0.700841	1	0.749556	1
12	1940	2		1	0.708979	1	0.709556	1	0.700841	1	0.749556	1
12	1342	5		1	0.708979	1	0.709556	1	0.700841	1	0.749556	1
12	1868	5		1	0.708979	1	0.709556	1	0.700841	1	0.749556	1
14	2335	0		1	0.706246	1	0.709556	1	0.693697	1	0.749556	1
14	2259	7		1	0.706246	1	0.709556	1	0.693697	1	0.749556	1
14	2465	2		1	0.706246	1	0.709556	1	0.693697	1	0.749556	1
14	2575	7		1	0.706246	1	0.709556	1	0.693697	1	0.749556	1
14	2854	6		1	0.704305	1	0.706732	1	0.692414	1	0.746904	1
13	399	6		1	0.707891	1	0.709556	1	0.69736	1	0.749556	1
13	365	0		1	0.707891	1	0.709556	1	0.69736	1	0.749556	1
13	363	0		1	0.707891	1	0.709556	1	0.69736	1	0.749556	1
13	386	8		1	0.707891	1	0.709556	1	0.69736	1	0.749556	1
13	327	8		1	0.707891	1	0.709556	1	0.69736	1	0.749556	1
12	1438	1		1	0.708979	1	0.709556	1	0.700841	1	0.749556	1
12	1103	6		1	0.708979	1	0.709556	1	0.700841	1	0.749556	1
12	1144	4		1	0.708979	1	0.709556	1	0.700841	1	0.749556	1
12	1860	8		1	0.708979	1	0.709556	1	0.700841	1	0.749556	1
12	1564	9		1	0.708979	1	0.709556	1	0.700841	1	0.749556	1
12	1568	0		1	0.708979	1	0.709556	1	0.700841	1	0.749556	1
12	1351	1		1	0.708979	1	0.709556	1	0.700841	1	0.749556	1
12	1043	2		1	0.708979	1	0.709556	1	0.700841	1	0.749556	1
12	1902	3		1	0.708979	1	0.709556	1	0.700841	1	0.749556	1
12	1248	9		1	0.708979	1	0.709556	1	0.700841	1	0.749556	1
12	2231	4		1	0.708979	1	0.709556	1	0.700841	1	0.749556	1
12	2944	6		1	0.706026	1	0.705334	1	0.699083	1	0.746326	1
12	2640	1		1	0.708979	1	0.709556	1	0.700841	1	0.749556	1
12	2509	2		1	0.708979	1	0.709556	1	0.700841	1	0.749556	1
12	2621	0		1	0.708979	1	0.709556	1	0.700841	1	0.749556	1
11	2638	1		1	0.70951	1	0.709556	1	0.704014	1	0.749556	1
11	2086	7		1	0.70951	1	0.709556	1	0.704014	1	0.749556	1
11	2230	8		1	0.70951	1	0.709556	1	0.704014	1	0.749556	1
11	2321	7		1	0.70951	1	0.709556	1	0.704014	1	0.749556	1
11	2409	7		1	0.70951	1	0.709556	1	0.704014	1	0.749556	1
12	2714	0		1	0.708809	1	0.709311	1	0.70074	1	0.749368	1
12	2685	9		1	0.708979	1	0.709556	1	0.700841	1	0.749556	1
12	2362	3		1	0.708979	1	0.709556	1	0.700841	1	0.749556	1
12	2033	2		1	0.708979	1	0.709556	1	0.700841	1	0.749556	1
12	2898	3		1	0.70658	1	0.706124	1	0.699412	1	0.746928	1
9	10902	123		1	0.620304	1	0.602274	1	0.620596	1	0.632989	1
9	10172	198		1	0.627462	1	0.607207	1	0.628265	1	0.640243	1
9	12311	160		1	0.606919	1	0.588196	1	0.606306	1	0.616998	1
9	10641	147		1	0.622853	1	0.604104	1	0.623326	1	0.635595	1
9	15041	179		1	0.582705	1	0.565385	1	0.580614	1	0.590536	1
12	2108	6		1	0.708979	1	0.709556	1	0.700841	1	0.749556	1
12	2366	3		1	0.708979	1	0.709556	1	0.700841	1	0.749556	1
12	2098	8		1	0.708979	1	0.709556	1	0.700841	1	0.749556	1
12	2813	9		1	0.707608	1	0.70759	1	0.700024	1	0.748049	1
12	2999	0		1	0.705365	1	0.704394	1	0.698689	1	0.745611	1
12	1329	7		1	0.708979	1	0.709556	1	0.700841	1	0.749556	1
12	1629	9		1	0.708979	1	0.709556	1	0.700841	1	0.749556	1
12	1413	3		1	0.708979	1	0.709556	1	0.700841	1	0.749556	1
12	1578	5		1	0.708979	1	0.709556	1	0.700841	1	0.749556	1
12	1477	6		1	0.708979	1	0.709556	1	0.700841	1	0.749556	1
9	2193	13		1	0.709556	1	0.709556	1	0.709077	1	0.749556	1
9	2458	15		1	0.709556	1	0.709556	1	0.709077	1	0.749556	1
9	2744	13		1	0.709025	1	0.708797	1	0.708798	1	0.7491	1
9	2802	19		1	0.708327	1	0.7078	1	0.708431	1	0.748502	1
9	2688	14		1	0.709556	1	0.709556	1	0.709077	1	0.749556	1
12	3450	5		1	0.700001	1	0.69684	1	0.695505	1	0.739907	1
12	3889	8		1	0.694804	1	0.689743	1	0.692433	1	0.734622	1
12	3280	5		1	0.702011	1	0.699655	1	0.696697	1	0.742023	1
12	3320	8		1	0.701537	1	0.69899	1	0.696415	1	0.741521	1
12	3717	4		1	0.696845	1	0.692494	1	0.693638	1	0.736662	1
13	2264	4		1	0.707891	1	0.709556	1	0.69736	1	0.749556	1
13	2935	2		1	0.705003	1	0.7054	1	0.695551	1	0.746048	1
13	2968	2		1	0.7046	1	0.704823	1	0.695299	1	0.745564	1
13	2215	9		1	0.707891	1	0.709556	1	0.69736	1	0.749556	1
13	2161	5		1	0.707891	1	0.709556	1	0.69736	1	0.749556	1
12	2631	5		1	0.708979	1	0.709556	1	0.700841	1	0.749556	1
12	2743	3		1	0.708456	1	0.708806	1	0.70053	1	0.74898	1
12	2779	7		1	0.70802	1	0.70818	1	0.700269	1	0.7485	1
12	2520	8		1	0.708979	1	0.709556	1	0.700841	1	0.749556	1
12	2022	4		1	0.708979	1	0.709556	1	0.700841	1	0.749556	1
11	1292	31		1	0.70951	1	0.709556	1	0.704014	1	0.749556	1
11	1806	30		1	0.70951	1	0.709556	1	0.704014	1	0.749556	1
11	1184	34		1	0.70951	1	0.709556	1	0.704014	1	0.749556	1
11	1020	38		1	0.70951	1	0.709556	1	0.704014	1	0.749556	1
11	1381	31		1	0.70951	1	0.709556	1	0.704014	1	0.749556	1
13	20421	3		1	0.537368	1	0.527912	1	0.503781	1	0.518458	1
13	28115	2		1	0.285033	0	0.28319	0	0.296725	0	0.28489	0
13	26537	6		1	0.288802	0	0.288265	0	0.299002	0	0.289161	0
13	25929	8		1	0.325085	0	0.332889	0	0.334821	0	0.344942	0
13	27207	5		1	0.285033	0	0.28319	0	0.296725	0	0.28489	0
13	1360	3		1	0.707891	1	0.709556	1	0.69736	1	0.749556	1
13	1932	3		1	0.707891	1	0.709556	1	0.69736	1	0.749556	1
13	1752	6		1	0.707891	1	0.709556	1	0.69736	1	0.749556	1
13	1643	2		1	0.707891	1	0.709556	1	0.69736	1	0.749556	1
13	1907	3		1	0.707891	1	0.709556	1	0.69736	1	0.749556	1
14	1475	7		1	0.706246	1	0.709556	1	0.693697	1	0.749556	1
14	1340	9		1	0.706246	1	0.709556	1	0.693697	1	0.749556	1
14	1744	2		1	0.706246	1	0.709556	1	0.693697	1	0.749556	1
14	1669	1		1	0.706246	1	0.709556	1	0.693697	1	0.749556	1
14	1557	2		1	0.706246	1	0.709556	1	0.693697	1	0.749556	1
28	2087	4		1	0.663311	1	0.708716	1	0.65743	1	0.742922	1
28	2729	3		1	0.662224	1	0.705092	1	0.655483	1	0.717887	1
28	2332	9		1	0.663311	1	0.708716	1	0.65743	1	0.742922	1
28	2456	6		1	0.663311	1	0.708716	1	0.65743	1	0.742922	1
28	2475	0		1	0.663311	1	0.708716	1	0.65743	1	0.742922	1
29	281	119		1	0.658938	1	0.695028	1	0.649666	1	0.658241	1
29	231	131		1	0.658058	1	0.692501	1	0.648006	1	0.648859	1
29	218	165		1	0.654773	1	0.686877	1	0.641932	1	0.631575	1
29	255	137		1	0.657475	1	0.691497	1	0.646916	1	0.64544	1
29	222	182		1	0.653146	1	0.684122	1	0.638994	1	0.624527	1
28	3074	3640		1	0.5	0	0.478862	0	0.5	1	0.504222	1
28	3648	3055		1	0.5	0	0.457819	0	0.5	1	0.495388	0
28	3619	3718		1	0.5	0	0.458773	0	0.5	1	0.495697	0
28	3430	3690		1	0.5	0	0.465256	0	0.5	1	0.497989	0
28	3207	3061		1	0.5	0	0.473547	0	0.5	1	0.501512	1
29	7318	19540		1	0.5	1	0.388453	0	0.5	1	0.446748	0
29	7303	18781		1	0.5	1	0.388453	0	0.5	1	0.446748	0
29	7771	15616		1	0.5	1	0.388453	0	0.5	1	0.446748	0
29	7968	11461		1	0.5	1	0.388453	0	0.5	1	0.446748	0
29	7100	17231		1	0.5	1	0.388453	0	0.5	1	0.446748	0
28	90649	74065		1	0.335109	0	0.28319	0	0.340911	0	0.28489	0
28	98665	77558		1	0.335109	0	0.28319	0	0.340911	0	0.28489	0
28	91630	78589		1	0.335109	0	0.28319	0	0.340911	0	0.28489	0
28	94011	78385		1	0.335109	0	0.28319	0	0.340911	0	0.28489	0
28	97073	76762		1	0.335109	0	0.28319	0	0.340911	0	0.28489	0
28	2081	6		1	0.663311	1	0.708716	1	0.65743	1	0.742922	1
28	2947	7		1	0.650909	1	0.685255	1	0.636345	1	0.639313	1
28	2625	5		1	0.663311	1	0.708716	1	0.65743	1	0.742922	1
28	2279	0		1	0.663311	1	0.708716	1	0.65743	1	0.742922	1
28	2499	6		1	0.663311	1	0.708716	1	0.65743	1	0.742922	1
28	3962	3443		1	0.5	0	0.448117	0	0.5	1	0.486249	0
28	3433	3615		1	0.5	0	0.465149	0	0.5	1	0.497948	0
28	3595	3167		1	0.5	0	0.459571	0	0.5	1	0.495961	0
28	3754	3648		1	0.5	0	0.454419	0	0.5	1	0.494339	0
28	3692	3247		1	0.5	0	0.456391	0	0.5	1	0.494938	0
29	8627	25415		1	0.5	1	0.388453	0	0.5	1	0.446748	0
29	8848	28434		1	0.396329	0	0.329714	0	0.42861	0	0.452615	0
29	8902	20549		1	0.5	1	0.388453	0	0.5	1	0.446748	0
29	8121	27976		1	0.416265	0	0.342873	0	0.457277	0	0.446984	0
29	8079	20118		1	0.5	1	0.388453	0	0.5	1	0.446748	0
28	1664	9019		1	0.5	0	0.495953	0	0.5	1	0.516782	1
28	1095	9931		1	0.5	0	0.495953	0	0.5	1	0.516782	1
28	1694	9220		1	0.5	0	0.495953	0	0.5	1	0.516782	1
28	1607	9090		1	0.5	0	0.495953	0	0.5	1	0.516782	1
28	1371	9546		1	0.5	0	0.495953	0	0.5	1	0.516782	1
12	2757	6269		1	0.588556	1	0.574035	1	0.589121	1	0.59887	1
12	2573	6947		1	0.575084	1	0.562555	1	0.577627	1	0.588035	1
12	2798	6863		1	0.57675	1	0.562283	1	0.579165	1	0.588384	1
12	2923	6589		1	0.582188	1	0.56497	1	0.583966	1	0.5916	1
12	2771	6151		1	0.590917	1	0.575978	1	0.591056	1	0.600789	1
12	1656	1		1	0.708979	1	0.709556	1	0.700841	1	0.749556	1
12	1222	7		1	0.708979	1	0.709556	1	0.700841	1	0.749556	1
12	1581	9		1	0.708979	1	0.709556	1	0.700841	1	0.749556	1
12	1958	3		1	0.708979	1	0.709556	1	0.700841	1	0.749556	1
12	1323	1		1	0.708979	1	0.709556	1	0.700841	1	0.749556	1
12	2051	0		1	0.708979	1	0.709556	1	0.700841	1	0.749556	1
12	2287	6		1	0.708979	1	0.709556	1	0.700841	1	0.749556	1
12	2159	4		1	0.708979	1	0.709556	1	0.700841	1	0.749556	1
12	2920	4		1	0.706315	1	0.705746	1	0.699255	1	0.74664	1
12	2111	8		1	0.708979	1	0.709556	1	0.700841	1	0.749556	1
13	2307	3		1	0.707891	1	0.709556	1	0.69736	1	0.749556	1
13	2876	3		1	0.705725	1	0.706436	1	0.696003	1	0.746919	1
13	2521	3		1	0.707891	1	0.709556	1	0.69736	1	0.749556	1
13	2478	5		1	0.707891	1	0.709556	1	0.69736	1	0.749556	1
13	2451	0		1	0.707891	1	0.709556	1	0.69736	1	0.749556	1
12	3775	2		1	0.696155	1	0.691562	1	0.69323	1	0.73597	1
12	3468	5		1	0.699789	1	0.696544	1	0.69538	1	0.739685	1
12	3621	2		1	0.69799	1	0.694046	1	0.694315	1	0.737818	1
12	3687	4		1	0.697202	1	0.692978	1	0.693849	1	0.737022	1
12	3165	8		1	0.703379	1	0.701582	1	0.697509	1	0.743477	1
12	1021	2		1	0.708979	1	0.709556	1	0.700841	1	0.749556	1
12	1274	6		1	0.708979	1	0.709556	1	0.700841	1	0.749556	1
12	1991	7		1	0.708979	1	0.709556	1	0.700841	1	0.749556	1
12	1378	7		1	0.708979	1	0.709556	1	0.700841	1	0.749556	1
12	1992	7		1	0.708979	1	0.709556	1	0.700841	1	0.749556	1
29	3478	4660		1	0.5	1	0.454615	0	0.5	1	0.495767	0
29	3730	4424		1	0.5	1	0.44539	0	0.5	1	0.49358	0
29	3399	4857		1	0.5	1	0.457727	0	0.5	1	0.496613	0
29	3520	4958		1	0.5	1	0.453005	0	0.5	1	0.495353	0
29	3124	4244		1	0.5	1	0.4695	0	0.5	1	0.500471	1
4	9840	8		1	0.630783	1	0.613857	1	0.638342	1	0.652489	1
4	9266	8		1	0.636576	1	0.619934	1	0.644363	1	0.659388	1
4	9323	4		1	0.635996	1	0.61932	1	0.643767	1	0.658697	1
4	9963	9		1	0.629547	1	0.612584	1	0.637056	1	0.651042	1
4	9330	1		1	0.635925	1	0.619245	1	0.643698	1	0.658616	1
28	2213	17965		1	0.5	0	0.495953	0	0.5	1	0.516782	1
28	2753	19333		1	0.5	0	0.493001	0	0.5	1	0.514044	1
28	2850	14394		1	0.5	0	0.488518	0	0.5	1	0.510413	1
28	2322	11594		1	0.5	0	0.495953	0	0.5	1	0.516782	1
28	2440	17994		1	0.5	0	0.495953	0	0.5	1	0.516782	1
10	38388	18036		1	0.28319	0	0.28319	0	0.286167	0	0.28489	0
10	37624	10704		1	0.302884	0	0.28319	0	0.301036	0	0.28489	0
10	33892	16649		1	0.28319	0	0.28319	0	0.286167	0	0.28489	0
10	33449	17945		1	0.28319	0	0.28319	0	0.286167	0	0.28489	0
10	39772	17450		1	0.28319	0	0.28319	0	0.286167	0	0.28489	0
25	3726	287		1	0.640224	1	0.634265	1	0.621731	1	0.599696	1
25	3639	279		1	0.642764	1	0.638584	1	0.624696	1	0.603528	1
25	3980	285		1	0.632961	1	0.625014	1	0.611033	1	0.588541	1
25	3388	282		1	0.650099	1	0.648344	1	0.63356	1	0.613216	1
25	3123	298		1	0.65806	1	0.657539	1	0.643673	1	0.623929	1
10	14964	549		1	0.583359	1	0.557665	1	0.575768	1	0.580568	1
10	14697	586		1	0.585638	1	0.558776	1	0.578214	1	0.582457	1
10	15713	569		1	0.577091	1	0.551985	1	0.569059	1	0.573927	1
10	16413	551		1	0.571376	1	0.547625	1	0.562961	1	0.568401	1
10	12664	575		1	0.603671	1	0.57455	1	0.597667	1	0.601771	1
15	5489	287		1	0.669219	1	0.652968	1	0.651615	1	0.674506	1
15	5264	238		1	0.671926	1	0.658479	1	0.655432	1	0.682069	1
15	5688	206		1	0.666836	1	0.653657	1	0.648273	1	0.672573	1
15	5838	258		1	0.665028	1	0.649221	1	0.645746	1	0.667038	1
15	5973	266		1	0.663412	1	0.646968	1	0.643495	1	0.663553	1
11	2263	0		1	0.70951	1	0.709556	1	0.704014	1	0.749556	1
11	2841	7		1	0.707812	1	0.707131	1	0.703049	1	0.747862	1
11	2759	6		1	0.708798	1	0.708538	1	0.703609	1	0.748844	1
11	2255	8		1	0.70951	1	0.709556	1	0.704014	1	0.749556	1
11	2692	3		1	0.70951	1	0.709556	1	0.704014	1	0.749556	1
12	1062	9		1	0.708979	1	0.709556	1	0.700841	1	0.749556	1
12	1936	0		1	0.708979	1	0.709556	1	0.700841	1	0.749556	1
12	1058	4		1	0.708979	1	0.709556	1	0.700841	1	0.749556	1
12	1059	7		1	0.708979	1	0.709556	1	0.700841	1	0.749556	1
12	1522	8		1	0.708979	1	0.709556	1	0.700841	1	0.749556	1
13	4019	4		1	0.691949	1	0.687234	1	0.686739	1	0.730059	1
13	4437	6		1	0.687011	1	0.68064	1	0.68033	1	0.719626	1
13	4052	2		1	0.691556	1	0.686705	1	0.686228	1	0.729217	1
13	4856	6		1	0.682094	1	0.674242	1	0.673985	1	0.709648	1
13	4822	2		1	0.682494	1	0.674754	1	0.674499	1	0.71044	1
12	1673	5		1	0.708979	1	0.709556	1	0.700841	1	0.749556	1
12	1854	5		1	0.708979	1	0.709556	1	0.700841	1	0.749556	1
12	1857	6		1	0.708979	1	0.709556	1	0.700841	1	0.749556	1
12	1756	5		1	0.708979	1	0.709556	1	0.700841	1	0.749556	1
12	1231	3		1	0.708979	1	0.709556	1	0.700841	1	0.749556	1
12	1140	3		1	0.708979	1	0.709556	1	0.700841	1	0.749556	1
12	1156	0		1	0.708979	1	0.709556	1	0.700841	1	0.749556	1
12	1862	8		1	0.708979	1	0.709556	1	0.700841	1	0.749556	1
12	1197	8		1	0.708979	1	0.709556	1	0.700841	1	0.749556	1
12	1960	5		1	0.708979	1	0.709556	1	0.700841	1	0.749556	1
4	9946	0		1	0.629718	1	0.612759	1	0.637248	1	0.651254	1
4	9590	8		1	0.6333	1	0.616477	1	0.640958	1	0.655462	1
4	9432	2		1	0.634892	1	0.618153	1	0.642622	1	0.657375	1
4	9204	4		1	0.637208	1	0.620603	1	0.645027	1	0.660154	1
4	9188	7		1	0.637371	1	0.620777	1	0.645192	1	0.660347	1
8	1588	21		1	0.709556	1	0.709556	1	0.710833	1	0.749556	1
8	1777	25		1	0.709556	1	0.709556	1	0.710833	1	0.749556	1
8	1711	22		1	0.709556	1	0.709556	1	0.710833	1	0.749556	1
8	1947	28		1	0.709556	1	0.709556	1	0.710833	1	0.749556	1
8	1760	26		1	0.709556	1	0.709556	1	0.710833	1	0.749556	1
12	2961	5		1	0.705822	1	0.705043	1	0.698961	1	0.746104	1
12	2567	9		1	0.708979	1	0.709556	1	0.700841	1	0.749556	1
12	2873	0		1	0.706882	1	0.706554	1	0.699592	1	0.747257	1
12	2573	2		1	0.708979	1	0.709556	1	0.700841	1	0.749556	1
12	2476	0		1	0.708979	1	0.709556	1	0.700841	1	0.749556	1
13	1746	3		1	0.707891	1	0.709556	1	0.69736	1	0.749556	1
13	1609	7		1	0.707891	1	0.709556	1	0.69736	1	0.749556	1
13	1334	4		1	0.707891	1	0.709556	1	0.69736	1	0.749556	1
13	1350	0		1	0.707891	1	0.709556	1	0.69736	1	0.749556	1
13	1475	9		1	0.707891	1	0.709556	1	0.69736	1	0.749556	1
12	2731	1		1	0.708602	1	0.709015	1	0.700616	1	0.74914	1
12	2823	3		1	0.707487	1	0.707417	1	0.699952	1	0.747916	1
12	2792	4		1	0.707862	1	0.707954	1	0.700175	1	0.748327	1
12	2354	4		1	0.708979	1	0.709556	1	0.700841	1	0.749556	1
12	2145	4		1	0.708979	1	0.709556	1	0.700841	1	0.749556	1
12	2119	8		1	0.708979	1	0.709556	1	0.700841	1	0.749556	1
12	2067	0		1	0.708979	1	0.709556	1	0.700841	1	0.749556	1
12	2498	5		1	0.708979	1	0.709556	1	0.700841	1	0.749556	1
12	2379	2		1	0.708979	1	0.709556	1	0.700841	1	0.749556	1
12	2165	3		1	0.708979	1	0.709556	1	0.700841	1	0.749556	1
12	2530	4		1	0.708979	1	0.709556	1	0.700841	1	0.749556	1
12	2855	9		1	0.7071	1	0.706864	1	0.699721	1	0.747494	1
12	2617	0		1	0.708979	1	0.709556	1	0.700841	1	0.749556	1
12	2765	1		1	0.708189	1	0.708423	1	0.70037	1	0.748687	1
12	2091	0		1	0.708979	1	0.709556	1	0.700841	1	0.749556	1
4	9386	0		1	0.635357	1	0.618645	1	0.643109	1	0.657935	1
4	9898	3		1	0.6302	1	0.613256	1	0.637744	1	0.651813	1
4	9844	5		1	0.630743	1	0.613816	1	0.638305	1	0.652446	1
4	9545	4		1	0.633753	1	0.616952	1	0.641435	1	0.656008	1
4	9799	0		1	0.631197	1	0.614284	1	0.638786	1	0.652985	1
13	1925	4		1	0.707891	1	0.709556	1	0.69736	1	0.749556	1
13	1631	4		1	0.707891	1	0.709556	1	0.69736	1	0.749556	1
13	1153	5		1	0.707891	1	0.709556	1	0.69736	1	0.749556	1
13	1231	8		1	0.707891	1	0.709556	1	0.69736	1	0.749556	1
13	1938	4		1	0.707891	1	0.709556	1	0.69736	1	0.749556	1
12	2822	3		1	0.707499	1	0.707434	1	0.699959	1	0.74793	1
12	2751	3		1	0.708359	1	0.708666	1	0.700472	1	0.748873	1
12	2470	1		1	0.708979	1	0.709556	1	0.700841	1	0.749556	1
12	2770	3		1	0.708129	1	0.708336	1	0.700334	1	0.74862	1
12	2579	8		1	0.708979	1	0.709556	1	0.700841	1	0.749556	1
12	1871	9		1	0.708979	1	0.709556	1	0.700841	1	0.749556	1
12	1821	8		1	0.708979	1	0.709556	1	0.700841	1	0.749556	1
12	1780	6		1	0.708979	1	0.709556	1	0.700841	1	0.749556	1
12	1883	7		1	0.708979	1	0.709556	1	0.700841	1	0.749556	1
12	1031	9		1	0.708979	1	0.709556	1	0.700841	1	0.749556	1
12	1137	8		1	0.708979	1	0.709556	1	0.700841	1	0.749556	1
12	1767	1		1	0.708979	1	0.709556	1	0.700841	1	0.749556	1
12	1046	7		1	0.708979	1	0.709556	1	0.700841	1	0.749556	1
12	1012	3		1	0.708979	1	0.709556	1	0.700841	1	0.749556	1
12	1824	9		1	0.708979	1	0.709556	1	0.700841	1	0.749556	1
12	3693	13		1	0.697131	1	0.692881	1	0.693807	1	0.73695	1
12	3499	11		1	0.699425	1	0.696036	1	0.695164	1	0.739304	1
12	3194	10		1	0.703033	1	0.701094	1	0.697304	1	0.743109	1
12	3664	16		1	0.697477	1	0.69335	1	0.694011	1	0.737299	1
12	3163	10		1	0.703402	1	0.701615	1	0.697523	1	0.743503	1
13	2419	53		1	0.707891	1	0.709556	1	0.69736	1	0.749556	1
13	2147	50		1	0.707891	1	0.709556	1	0.69736	1	0.749556	1
13	2225	58		1	0.707891	1	0.709556	1	0.69736	1	0.749556	1
13	2307	59		1	0.707891	1	0.709556	1	0.69736	1	0.749556	1
13	2763	59		1	0.707114	1	0.708434	1	0.696873	1	0.748605	1
11	1881	9		1	0.70951	1	0.709556	1	0.704014	1	0.749556	1
11	1564	3		1	0.70951	1	0.709556	1	0.704014	1	0.749556	1
11	1192	7		1	0.70951	1	0.709556	1	0.704014	1	0.749556	1
11	1078	1		1	0.70951	1	0.709556	1	0.704014	1	0.749556	1
11	1189	6		1	0.70951	1	0.709556	1	0.704014	1	0.749556	1
13	2711	2		1	0.707755	1	0.709359	1	0.697275	1	0.749389	1
13	2501	5		1	0.707891	1	0.709556	1	0.69736	1	0.749556	1
13	2824	9		1	0.706364	1	0.707353	1	0.696403	1	0.747692	1
13	2166	8		1	0.707891	1	0.709556	1	0.69736	1	0.749556	1
13	2844	7		1	0.706118	1	0.707	1	0.696249	1	0.747394	1
12	3356	3		1	0.701111	1	0.698392	1	0.696163	1	0.741072	1
12	3121	5		1	0.703904	1	0.702323	1	0.697821	1	0.744039	1
12	3256	7		1	0.702296	1	0.700056	1	0.696866	1	0.742325	1
12	3392	5		1	0.700685	1	0.697796	1	0.695911	1	0.740624	1
12	3976	2		1	0.693778	1	0.688365	1	0.691502	1	0.733102	1
12	2296	5		1	0.708979	1	0.709556	1	0.700841	1	0.749556	1
12	2685	3		1	0.708979	1	0.709556	1	0.700841	1	0.749556	1
12	2370	2		1	0.708979	1	0.709556	1	0.700841	1	0.749556	1
12	2386	8		1	0.708979	1	0.709556	1	0.700841	1	0.749556	1
12	2380	0		1	0.708979	1	0.709556	1	0.700841	1	0.749556	1
8	1806	69		1	0.709556	1	0.709556	1	0.710833	1	0.749556	1
8	1930	60		1	0.709556	1	0.709556	1	0.710833	1	0.749556	1
8	1834	67		1	0.709556	1	0.709556	1	0.710833	1	0.749556	1
8	1906	66		1	0.709556	1	0.709556	1	0.710833	1	0.749556	1
8	1574	61		1	0.709556	1	0.709556	1	0.710833	1	0.749556	1
1	4463	8		1	0.688835	1	0.681119	1	0.698812	1	0.729165	1
1	4094	9		1	0.693093	1	0.686753	1	0.703257	1	0.735617	1
1	4584	0		1	0.687454	1	0.679306	1	0.697379	1	0.727093	1
1	4820	3		1	0.684732	1	0.675817	1	0.694534	1	0.723098	1
1	4145	7		1	0.6925	1	0.685965	1	0.70264	1	0.734714	1
12	3556	7		1	0.698756	1	0.695104	1	0.694768	1	0.738607	1
12	3415	8		1	0.700414	1	0.697417	1	0.69575	1	0.740339	1
12	3331	1		1	0.701406	1	0.698807	1	0.696338	1	0.741384	1
12	3214	8		1	0.702795	1	0.700759	1	0.697162	1	0.742855	1
12	3771	0		1	0.696202	1	0.691627	1	0.693258	1	0.736018	1
12	2614	3		1	0.708979	1	0.709556	1	0.700841	1	0.749556	1
12	2608	8		1	0.708979	1	0.709556	1	0.700841	1	0.749556	1
12	2896	9		1	0.706605	1	0.706158	1	0.699427	1	0.746954	1
12	2969	7		1	0.705725	1	0.704906	1	0.698904	1	0.746	1
12	2574	9		1	0.708979	1	0.709556	1	0.700841	1	0.749556	1
12	2961	8		1	0.705822	1	0.705043	1	0.698961	1	0.746104	1
12	2234	1		1	0.708979	1	0.709556	1	0.700841	1	0.749556	1
12	2382	5		1	0.708979	1	0.709556	1	0.700841	1	0.749556	1
12	2577	0		1	0.708979	1	0.709556	1	0.700841	1	0.749556	1
12	2816	5		1	0.707571	1	0.707538	1	0.700002	1	0.748009	1
9	1013	11		1	0.709556	1	0.709556	1	0.709077	1	0.749556	1
9	1618	16		1	0.709556	1	0.709556	1	0.709077	1	0.749556	1
9	1973	17		1	0.709556	1	0.709556	1	0.709077	1	0.749556	1
9	1586	15		1	0.709556	1	0.709556	1	0.709077	1	0.749556	1
9	1504	15		1	0.709556	1	0.709556	1	0.709077	1	0.749556	1
12	2199	1		1	0.708979	1	0.709556	1	0.700841	1	0.749556	1
12	2062	3		1	0.708979	1	0.709556	1	0.700841	1	0.749556	1
12	2890	7		1	0.706677	1	0.706261	1	0.69947	1	0.747033	1
12	2730	3		1	0.708614	1	0.709032	1	0.700624	1	0.749154	1
12	2121	2		1	0.708979	1	0.709556	1	0.700841	1	0.749556	1
12	1025	4		1	0.708979	1	0.709556	1	0.700841	1	0.749556	1
12	1469	5		1	0.708979	1	0.709556	1	0.700841	1	0.749556	1
12	1630	5		1	0.708979	1	0.709556	1	0.700841	1	0.749556	1
12	1642	7		1	0.708979	1	0.709556	1	0.700841	1	0.749556	1
12	1503	1		1	0.708979	1	0.709556	1	0.700841	1	0.749556	1
12	1321	4		1	0.708979	1	0.709556	1	0.700841	1	0.749556	1
12	1099	4		1	0.708979	1	0.709556	1	0.700841	1	0.749556	1
12	1431	3		1	0.708979	1	0.709556	1	0.700841	1	0.749556	1
12	1314	1		1	0.708979	1	0.709556	1	0.700841	1	0.749556	1
12	1987	4		1	0.708979	1	0.709556	1	0.700841	1	0.749556	1
9	1011	1		1	0.709556	1	0.709556	1	0.709077	1	0.749556	1
9	1036	3		1	0.709556	1	0.709556	1	0.709077	1	0.749556	1
9	1352	1		1	0.709556	1	0.709556	1	0.709077	1	0.749556	1
9	1803	8		1	0.709556	1	0.709556	1	0.709077	1	0.749556	1
9	1435	4		1	0.709556	1	0.709556	1	0.709077	1	0.749556	1
12	1702	5		1	0.708979	1	0.709556	1	0.700841	1	0.749556	1
12	1707	2		1	0.708979	1	0.709556	1	0.700841	1	0.749556	1
12	1584	3		1	0.708979	1	0.709556	1	0.700841	1	0.749556	1
12	1386	5		1	0.708979	1	0.709556	1	0.700841	1	0.749556	1
12	1045	3		1	0.708979	1	0.709556	1	0.700841	1	0.749556	1
10	2531	4		1	0.709556	1	0.709556	1	0.706782	1	0.749556	1
10	2041	0		1	0.709556	1	0.709556	1	0.706782	1	0.749556	1
10	2464	6		1	0.709556	1	0.709556	1	0.706782	1	0.749556	1
10	2692	8		1	0.709556	1	0.709556	1	0.706782	1	0.749556	1
10	2798	9		1	0.708375	1	0.707869	1	0.706141	1	0.748472	1
12	2568	3		1	0.708979	1	0.709556	1	0.700841	1	0.749556	1
12	2096	3		1	0.708979	1	0.709556	1	0.700841	1	0.749556	1
12	2791	6		1	0.707874	1	0.707971	1	0.700183	1	0.748341	1
12	2315	4		1	0.708979	1	0.709556	1	0.700841	1	0.749556	1
12	2288	5		1	0.708979	1	0.709556	1	0.700841	1	0.749556	1
12	1069	4		1	0.708979	1	0.709556	1	0.700841	1	0.749556	1
12	1240	4		1	0.708979	1	0.709556	1	0.700841	1	0.749556	1
12	1810	8		1	0.708979	1	0.709556	1	0.700841	1	0.749556	1
12	1931	6		1	0.708979	1	0.709556	1	0.700841	1	0.749556	1
12	1345	4		1	0.708979	1	0.709556	1	0.700841	1	0.749556	1
12	1580	9		1	0.708979	1	0.709556	1	0.700841	1	0.749556	1
12	1665	4		1	0.708979	1	0.709556	1	0.700841	1	0.749556	1
12	1865	8		1	0.708979	1	0.709556	1	0.700841	1	0.749556	1
12	1497	7		1	0.708979	1	0.709556	1	0.700841	1	0.749556	1
12	1290	5		1	0.708979	1	0.709556	1	0.700841	1	0.749556	1
8	2858	1		1	0.707655	1	0.706843	1	0.70986	1	0.748006	1
8	2898	5		1	0.707176	1	0.706161	1	0.709615	1	0.747617	1
8	2601	9		1	0.709556	1	0.709556	1	0.710833	1	0.749556	1
8	2663	3		1	0.709556	1	0.709556	1	0.710833	1	0.749556	1
8	2445	5		1	0.709556	1	0.709556	1	0.710833	1	0.749556	1
12	2310	64		1	0.708979	1	0.709556	1	0.700841	1	0.749556	1
12	2223	64		1	0.708979	1	0.709556	1	0.700841	1	0.749556	1
12	2938	63		1	0.706098	1	0.705437	1	0.699126	1	0.746405	1
12	2662	69		1	0.708979	1	0.709556	1	0.700841	1	0.749556	1
12	2405	68		1	0.708979	1	0.709556	1	0.700841	1	0.749556	1
12	1358	6		1	0.708979	1	0.709556	1	0.700841	1	0.749556	1
12	1920	8		1	0.708979	1	0.709556	1	0.700841	1	0.749556	1
12	1466	3		1	0.708979	1	0.709556	1	0.700841	1	0.749556	1
12	1451	5		1	0.708979	1	0.709556	1	0.700841	1	0.749556	1
12	1957	6		1	0.708979	1	0.709556	1	0.700841	1	0.749556	1
8	2285	7		1	0.709556	1	0.709556	1	0.710833	1	0.749556	1
8	2450	3		1	0.709556	1	0.709556	1	0.710833	1	0.749556	1
8	2792	0		1	0.708447	1	0.707972	1	0.710266	1	0.748651	1
8	2825	8		1	0.708051	1	0.707406	1	0.710063	1	0.748328	1
8	2577	3		1	0.709556	1	0.709556	1	0.710833	1	0.749556	1
12	1588	5		1	0.708979	1	0.709556	1	0.700841	1	0.749556	1
12	1750	0		1	0.708979	1	0.709556	1	0.700841	1	0.749556	1
12	1411	6		1	0.708979	1	0.709556	1	0.700841	1	0.749556	1
12	1868	4		1	0.708979	1	0.709556	1	0.700841	1	0.749556	1
12	1650	2		1	0.708979	1	0.709556	1	0.700841	1	0.749556	1
14	2696	3099		1	0.65196	1	0.6391	1	0.631563	1	0.651222	1
14	2991	3808		1	0.637982	1	0.61725	1	0.616331	1	0.626598	1
14	2865	3070		1	0.652452	1	0.63546	1	0.632201	1	0.648934	1
14	2038	3646		1	0.641243	1	0.627563	1	0.619742	1	0.635778	1
14	2700	3651		1	0.641142	1	0.627457	1	0.619636	1	0.635643	1
12	2116	1		1	0.708979	1	0.709556	1	0.700841	1	0.749556	1
12	2005	0		1	0.708979	1	0.709556	1	0.700841	1	0.749556	1
12	2016	6		1	0.708979	1	0.709556	1	0.700841	1	0.749556	1
12	2569	2		1	0.708979	1	0.709556	1	0.700841	1	0.749556	1
12	2960	2		1	0.705834	1	0.70506	1	0.698968	1	0.746118	1
12	1860	0		1	0.708979	1	0.709556	1	0.700841	1	0.749556	1
12	1508	1		1	0.708979	1	0.709556	1	0.700841	1	0.749556	1
12	1590	4		1	0.708979	1	0.709556	1	0.700841	1	0.749556	1
12	1578	5		1	0.708979	1	0.709556	1	0.700841	1	0.749556	1
12	1465	4		1	0.708979	1	0.709556	1	0.700841	1	0.749556	1
13	2870	1		1	0.705799	1	0.706541	1	0.696049	1	0.747008	1
13	2746	4		1	0.707324	1	0.708736	1	0.697004	1	0.748861	1
13	2293	9		1	0.707891	1	0.709556	1	0.69736	1	0.749556	1
13	2267	5		1	0.707891	1	0.709556	1	0.69736	1	0.749556	1
13	2474	5		1	0.707891	1	0.709556	1	0.69736	1	0.749556	1
9	1757	4		1	0.709556	1	0.709556	1	0.709077	1	0.749556	1
9	1794	9		1	0.709556	1	0.709556	1	0.709077	1	0.749556	1
9	1311	8		1	0.709556	1	0.709556	1	0.709077	1	0.749556	1
9	1388	4		1	0.709556	1	0.709556	1	0.709077	1	0.749556	1
9	1233	7		1	0.709556	1	0.709556	1	0.709077	1	0.749556	1
12	3473	1		1	0.69973	1	0.696462	1	0.695345	1	0.739623	1
12	3672	1		1	0.697381	1	0.69322	1	0.693955	1	0.737202	1
12	3405	9		1	0.700532	1	0.697582	1	0.69582	1	0.740463	1
12	3649	7		1	0.697656	1	0.693593	1	0.694117	1	0.73748	1
12	3968	6		1	0.693872	1	0.688492	1	0.691619	1	0.733289	1
10	8695	596		1	0.642464	1	0.609888	1	0.640125	1	0.646972	1
10	8861	586		1	0.640737	1	0.608518	1	0.638217	1	0.644989	1
10	8550	504		1	0.643961	1	0.614257	1	0.641779	1	0.650598	1
10	8921	565		1	0.640116	1	0.608557	1	0.637531	1	0.644592	1
10	8066	590		1	0.649019	1	0.616591	1	0.647379	1	0.655526	1
12	2091	8		1	0.708979	1	0.709556	1	0.700841	1	0.749556	1
12	2344	0		1	0.708979	1	0.709556	1	0.700841	1	0.749556	1
12	2766	3		1	0.708177	1	0.708406	1	0.700363	1	0.748673	1
12	2556	0		1	0.708979	1	0.709556	1	0.700841	1	0.749556	1
12	2146	2		1	0.708979	1	0.709556	1	0.700841	1	0.749556	1
12	1555	0		1	0.708979	1	0.709556	1	0.700841	1	0.749556	1
12	1143	5		1	0.708979	1	0.709556	1	0.700841	1	0.749556	1
12	1979	3		1	0.708979	1	0.709556	1	0.700841	1	0.749556	1
12	1737	4		1	0.708979	1	0.709556	1	0.700841	1	0.749556	1
12	1106	1		1	0.708979	1	0.709556	1	0.700841	1	0.749556	1
12	1348	3		1	0.708979	1	0.709556	1	0.700841	1	0.749556	1
12	1741	8		1	0.708979	1	0.709556	1	0.700841	1	0.749556	1
12	1101	5		1	0.708979	1	0.709556	1	0.700841	1	0.749556	1
12	1815	3		1	0.708979	1	0.709556	1	0.700841	1	0.749556	1
12	1389	5		1	0.708979	1	0.709556	1	0.700841	1	0.749556	1
12	1438	5		1	0.708979	1	0.709556	1	0.700841	1	0.749556	1
12	1005	6		1	0.708979	1	0.709556	1	0.700841	1	0.749556	1
12	1450	3		1	0.708979	1	0.709556	1	0.700841	1	0.749556	1
12	1556	0		1	0.708979	1	0.709556	1	0.700841	1	0.749556	1
12	1244	7		1	0.708979	1	0.709556	1	0.700841	1	0.749556	1
12	3114	8		1	0.703987	1	0.702442	1	0.69787	1	0.744129	1
12	3923	9		1	0.694403	1	0.689203	1	0.692196	1	0.734223	1
12	3788	1		1	0.696001	1	0.691354	1	0.693139	1	0.735815	1
12	3662	9		1	0.697501	1	0.693382	1	0.694025	1	0.737323	1
12	3086	6		1	0.704322	1	0.702915	1	0.698069	1	0.744488	1
8	1331	49		1	0.709556	1	0.709556	1	0.710833	1	0.749556	1
8	1821	49		1	0.709556	1	0.709556	1	0.710833	1	0.749556	1
8	1154	49		1	0.709556	1	0.709556	1	0.710833	1	0.749556	1
8	1530	43		1	0.709556	1	0.709556	1	0.710833	1	0.749556	1
8	1383	43		1	0.709556	1	0.709556	1	0.710833	1	0.749556	1
12	1834	9		1	0.708979	1	0.709556	1	0.700841	1	0.749556	1
12	1163	1		1	0.708979	1	0.709556	1	0.700841	1	0.749556	1
12	1188	9		1	0.708979	1	0.709556	1	0.700841	1	0.749556	1
12	1357	8		1	0.708979	1	0.709556	1	0.700841	1	0.749556	1
12	1674	1		1	0.708979	1	0.709556	1	0.700841	1	0.749556	1
12	2584	6		1	0.708979	1	0.709556	1	0.700841	1	0.749556	1
12	2879	1		1	0.70681	1	0.706451	1	0.699549	1	0.747178	1
12	2206	0		1	0.708979	1	0.709556	1	0.700841	1	0.749556	1
12	2965	4		1	0.705774	1	0.704975	1	0.698932	1	0.746052	1
12	2519	2		1	0.708979	1	0.709556	1	0.700841	1	0.749556	1
15	1725	6		1	0.704108	1	0.709556	1	0.689908	1	0.749556	1
15	1006	9		1	0.704108	1	0.709556	1	0.689908	1	0.749556	1
15	1782	2		1	0.704108	1	0.709556	1	0.689908	1	0.749556	1
15	1414	9		1	0.704108	1	0.709556	1	0.689908	1	0.749556	1
15	1189	3		1	0.704108	1	0.709556	1	0.689908	1	0.749556	1
11	3225	8		1	0.703239	1	0.700664	1	0.700456	1	0.743371	1
11	3493	0		1	0.700092	1	0.696266	1	0.698674	1	0.740339	1
11	3825	9		1	0.696185	1	0.690945	1	0.696467	1	0.736694	1
11	3163	9		1	0.703972	1	0.701695	1	0.700871	1	0.744084	1
11	3911	9		1	0.695175	1	0.689589	1	0.695897	1	0.735769	1
12	2626	7		1	0.708979	1	0.709556	1	0.700841	1	0.749556	1
12	2107	1		1	0.708979	1	0.709556	1	0.700841	1	0.749556	1
12	2037	7		1	0.708979	1	0.709556	1	0.700841	1	0.749556	1
12	2553	4		1	0.708979	1	0.709556	1	0.700841	1	0.749556	1
12	2166	3		1	0.708979	1	0.709556	1	0.700841	1	0.749556	1
12	1651	2		1	0.708979	1	0.709556	1	0.700841	1	0.749556	1
12	1152	7		1	0.708979	1	0.709556	1	0.700841	1	0.749556	1
12	1418	5		1	0.708979	1	0.709556	1	0.700841	1	0.749556	1
12	1766	9		1	0.708979	1	0.709556	1	0.700841	1	0.749556	1
12	1265	4		1	0.708979	1	0.709556	1	0.700841	1	0.749556	1
8	1114	6		1	0.709556	1	0.709556	1	0.710833	1	0.749556	1
8	1687	5		1	0.709556	1	0.709556	1	0.710833	1	0.749556	1
8	1452	4		1	0.709556	1	0.709556	1	0.710833	1	0.749556	1
8	1843	3		1	0.709556	1	0.709556	1	0.710833	1	0.749556	1
8	1192	9		1	0.709556	1	0.709556	1	0.710833	1	0.749556	1
12	1326	2		1	0.708979	1	0.709556	1	0.700841	1	0.749556	1
12	1333	6		1	0.708979	1	0.709556	1	0.700841	1	0.749556	1
12	1206	1		1	0.708979	1	0.709556	1	0.700841	1	0.749556	1
12	1680	0		1	0.708979	1	0.709556	1	0.700841	1	0.749556	1
12	1196	7		1	0.708979	1	0.709556	1	0.700841	1	0.749556	1
15	3274	1		1	0.696709	1	0.698758	1	0.684755	1	0.73842	1
15	3641	8		1	0.69207	1	0.692136	1	0.681553	1	0.731843	1
15	3555	7		1	0.693158	1	0.693669	1	0.682301	1	0.733349	1
15	3566	4		1	0.69302	1	0.693472	1	0.682206	1	0.733155	1
15	3857	2		1	0.689322	1	0.688337	1	0.679667	1	0.728152	1
12	2696	6		1	0.708979	1	0.709556	1	0.700841	1	0.749556	1
12	2412	1		1	0.708979	1	0.709556	1	0.700841	1	0.749556	1
12	2584	8		1	0.708979	1	0.709556	1	0.700841	1	0.749556	1
12	2988	0		1	0.705497	1	0.704582	1	0.698768	1	0.745753	1
12	2017	3		1	0.708979	1	0.709556	1	0.700841	1	0.749556	1
12	1440	2		1	0.708979	1	0.709556	1	0.700841	1	0.749556	1
12	1668	3		1	0.708979	1	0.709556	1	0.700841	1	0.749556	1
12	1934	3		1	0.708979	1	0.709556	1	0.700841	1	0.749556	1
12	1652	5		1	0.708979	1	0.709556	1	0.700841	1	0.749556	1
12	1167	9		1	0.708979	1	0.709556	1	0.700841	1	0.749556	1
13	2349	0		1	0.707891	1	0.709556	1	0.69736	1	0.749556	1
13	2809	1		1	0.706548	1	0.707618	1	0.696518	1	0.747916	1
13	2700	0		1	0.707891	1	0.709556	1	0.69736	1	0.749556	1
13	2975	6		1	0.704514	1	0.704701	1	0.695246	1	0.745462	1
13	2925	8		1	0.705125	1	0.705575	1	0.695628	1	0.746195	1
12	4289	0		1	0.690118	1	0.683485	1	0.686974	1	0.72588	1
12	4331	6		1	0.68963	1	0.682839	1	0.686372	1	0.724929	1
12	4203	2		1	0.691118	1	0.684814	1	0.688211	1	0.727841	1
12	4586	4		1	0.68669	1	0.678962	1	0.682748	1	0.719239	1
12	4561	4		1	0.686977	1	0.679339	1	0.683102	1	0.719791	1
12	1103	7		1	0.708979	1	0.709556	1	0.700841	1	0.749556	1
12	1023	3		1	0.708979	1	0.709556	1	0.700841	1	0.749556	1
12	1027	4		1	0.708979	1	0.709556	1	0.700841	1	0.749556	1
12	1160	3		1	0.708979	1	0.709556	1	0.700841	1	0.749556	1
12	1643	8		1	0.708979	1	0.709556	1	0.700841	1	0.749556	1
12	4664	8		1	0.685787	1	0.677791	1	0.681637	1	0.717528	1
12	4834	6		1	0.68381	1	0.675263	1	0.679207	1	0.713846	1
12	4366	6		1	0.689225	1	0.682303	1	0.685872	1	0.724139	1
12	4942	5		1	0.682561	1	0.673673	1	0.677675	1	0.711539	1
12	4156	0		1	0.691667	1	0.685544	1	0.688889	1	0.72892	1
11	15327	14375		1	0.439629	0	0.377352	0	0.439924	0	0.388986	0
11	16544	18773		1	0.389377	0	0.353486	0	0.401678	0	0.365764	0
11	12638	18558		1	0.391196	0	0.359577	0	0.403689	0	0.373644	0
11	18955	11651		1	0.485752	0	0.385796	0	0.485194	0	0.396675	0
11	19673	10184		1	0.500053	1	0.395177	0	0.500055	1	0.40731	0
12	1132	1		1	0.708979	1	0.709556	1	0.700841	1	0.749556	1
12	1308	7		1	0.708979	1	0.709556	1	0.700841	1	0.749556	1
12	1416	9		1	0.708979	1	0.709556	1	0.700841	1	0.749556	1
12	1405	5		1	0.708979	1	0.709556	1	0.700841	1	0.749556	1
12	1965	0		1	0.708979	1	0.709556	1	0.700841	1	0.749556	1
12	2290	9		1	0.708979	1	0.709556	1	0.700841	1	0.749556	1
12	2572	9		1	0.708979	1	0.709556	1	0.700841	1	0.749556	1
12	2501	6		1	0.708979	1	0.709556	1	0.700841	1	0.749556	1
12	2728	5		1	0.708639	1	0.709067	1	0.700638	1	0.749181	1
12	2472	8		1	0.708979	1	0.709556	1	0.700841	1	0.749556	1
12	2590	4		1	0.708979	1	0.709556	1	0.700841	1	0.749556	1
12	2678	0		1	0.708979	1	0.709556	1	0.700841	1	0.749556	1
12	2535	7		1	0.708979	1	0.709556	1	0.700841	1	0.749556	1
12	2092	2		1	0.708979	1	0.709556	1	0.700841	1	0.749556	1
12	2391	9		1	0.708979	1	0.709556	1	0.700841	1	0.749556	1
12	3214	3		1	0.702795	1	0.700759	1	0.697162	1	0.742855	1
12	3971	3		1	0.693837	1	0.688444	1	0.691575	1	0.733219	1
12	3943	2		1	0.694167	1	0.688887	1	0.691984	1	0.733877	1
12	3892	9		1	0.694769	1	0.689695	1	0.692412	1	0.734587	1
12	3033	3		1	0.704957	1	0.703815	1	0.698447	1	0.74517	1
12	2427	0		1	0.708979	1	0.709556	1	0.700841	1	0.749556	1
12	2221	6		1	0.708979	1	0.709556	1	0.700841	1	0.749556	1
12	2752	4		1	0.708347	1	0.708649	1	0.700464	1	0.74886	1
12	2774	9		1	0.70808	1	0.708267	1	0.700305	1	0.748567	1
12	2435	7		1	0.708979	1	0.709556	1	0.700841	1	0.749556	1
15	1122	7		1	0.704108	1	0.709556	1	0.689908	1	0.749556	1
15	1299	6		1	0.704108	1	0.709556	1	0.689908	1	0.749556	1
15	1136	9		1	0.704108	1	0.709556	1	0.689908	1	0.749556	1
15	1052	5		1	0.704108	1	0.709556	1	0.689908	1	0.749556	1
15	1384	6		1	0.704108	1	0.709556	1	0.689908	1	0.749556	1
